# Supplementary material for: The Transcription Factor Ultraspiracle Influences Honey Bee Social Behavior and Behavior-Related Gene Expression
Source: PubMed Central journal article supplement (PMC3315457; doi:10.1371/journal.pgen.1002596), 2012-03-29
Supplement: pgen.1002596.s002.pdf [file pgen.1002596.s002.pdf]

## GB20061

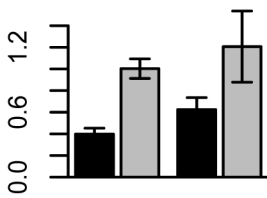

JHA- JHA+

qPCR, Col. 1

$$P_{RNAi} = 0.0002$$

$$P_{JHA} = 0.99$$

$$P_{RNAi \times JHA} = 0.20$$

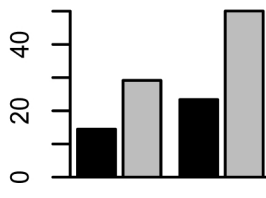

JHA- JHA+

RNA-seq, Col. 1

$$FDR_{RNAi} = 0.03$$

$$FDR_{JHA} = 0.08$$

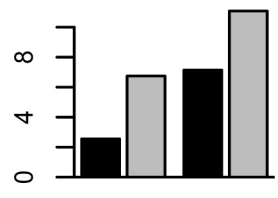

JHA- JHA+

RNA-seq, Col. 2

## GB17733

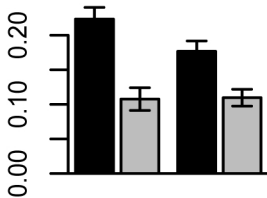

JHA- JHA+

qPCR, Col. 1

$$P_{RNAi} = 0.0001$$

$$P_{JHA} = 0.71$$

$$P_{RNAi \times JHA} = 0.21$$

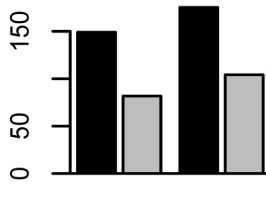

JHA- JHA+

RNA-seq, Col. 1

$$FDR_{RNAi} = 7.7e-5$$

$$FDR_{JHA} = 0.58$$

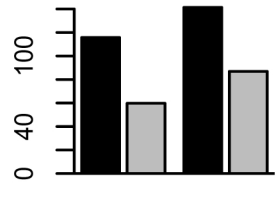

JHA- JHA+

RNA-seq, Col. 2

## GB13933

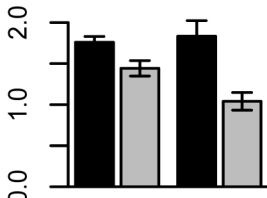

JHA- JHA+

qPCR, Col. 1

$$P_{RNAi} = 0.10$$

$$P_{JHA} = 0.007$$

$$P_{RNAi \times JHA} = 0.049$$

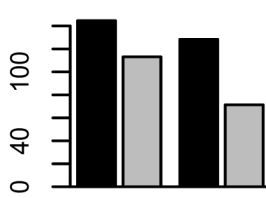

JHA- JHA+

RNA-seq, Col. 1

$$FDR_{RNAi} = 0.047$$

$$FDR_{JHA} = 0.84$$

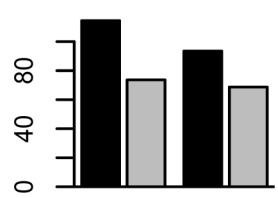

JHA- JHA+

RNA-seq, Col. 2

## GB15002

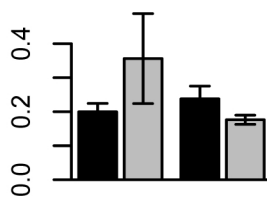

JHA- JHA+

qPCR, Col. 1

$$P_{RNAi} = 0.38$$

$$P_{JHA} = 0.21$$

$$P_{RNAi \times JHA} = 0.24$$

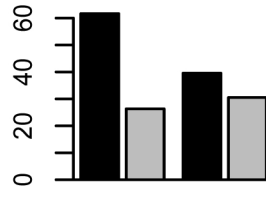

JHA- JHA+

RNA-seq, Col. 1

$$FDR_{RNAi} = 0.0005$$

$$FDR_{JHA} = 0.74$$

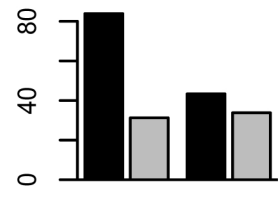

JHA- JHA+

RNA-seq, Col. 2

■ dsUSP

■ dsGFP

Relative mRNA level
