# Supplementary material for: The Transcription Factor Ultraspiracle Influences Honey Bee Social Behavior and Behavior-Related Gene Expression
Source: PubMed Central journal article supplement (PMC3315457; doi:10.1371/journal.pgen.1002596), 2012-03-29

**5ht7**  
 $P = 0.053$

Binding Strength

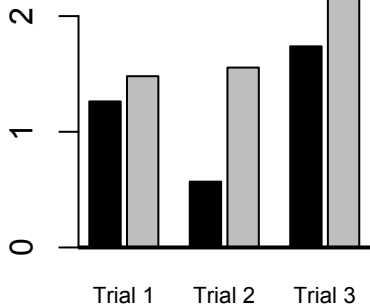

■ pre-bleed  
■ a-USP

**abl**  
 $P = 0.098$

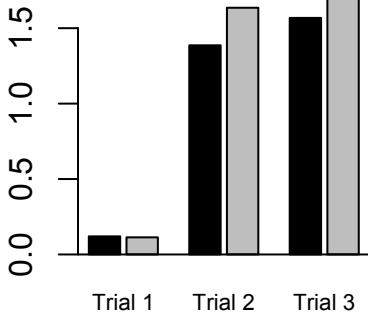

Supplement: pgen.1002596.s004.pdf [file pgen.1002596.s004.pdf]
