# Supplementary material for: The Transcription Factor Ultraspiracle Influences Honey Bee Social Behavior and Behavior-Related Gene Expression
Source: PubMed Central journal article supplement (PMC3315457; doi:10.1371/journal.pgen.1002596), 2012-03-29
Supplement: pgen.1002596.s006.pdf [file pgen.1002596.s006.pdf]

## GB10971

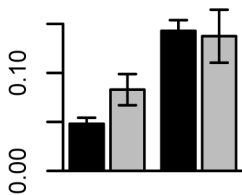

JHA- JHA+

qPCR, Col. 1

$$P_{RNAi} = 0.04$$

$$P_{JHA} = 0.04$$

$$P_{RNAi \times JHA} = 0.05$$

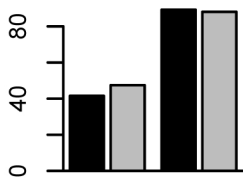

JHA- JHA+

RNA-seq, Col. 1

$$FDR_{RNAi} = 0.52$$

$$FDR_{JHA} = 5.4e-9$$

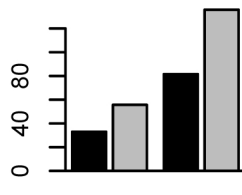

JHA- JHA+

RNA-seq, Col. 2

## GB12679

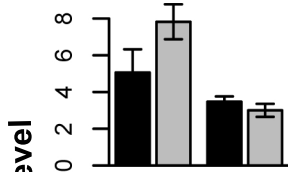

JHA- JHA+

qPCR, Col. 1

$$P_{RNAi} = 0.01$$

$$P_{JHA} = 0.0002$$

$$P_{RNAi \times JHA} = 0.02$$

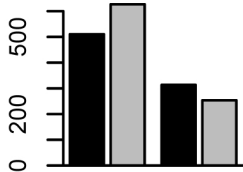

JHA- JHA+

RNA-seq, Col. 1

$$FDR_{RNAi} = 0.99$$

$$FDR_{JHA} = 6.1e-5$$

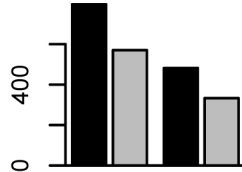

JHA- JHA+

RNA-seq, Col. 2

Relative mRNA level

## GB13621

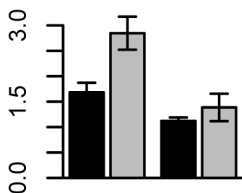

JHA- JHA+

qPCR, Col. 1

$$P_{RNAi} = 0.01$$

$$P_{JHA} = 0.0003$$

$$P_{RNAi \times JHA} = 0.11$$

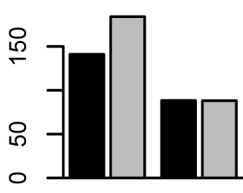

JHA- JHA+

RNA-seq, Col. 1

$$FDR_{RNAi} = 0.99$$

$$FDR_{JHA} = 4.5e-5$$

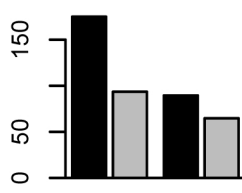

JHA- JHA+

RNA-seq, Col. 2

## GB16848

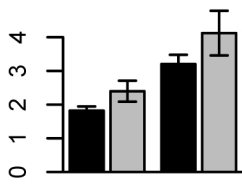

JHA- JHA+

qPCR, Col. 1

$$P_{RNAi} = 0.25$$

$$P_{JHA} = 0.02$$

$$P_{RNAi \times JHA} = 0.79$$

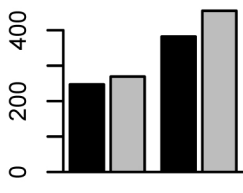

JHA- JHA+

RNA-seq, Col. 1

$$FDR_{RNAi} = 0.99$$

$$FDR_{JHA} = 1.99e-7$$

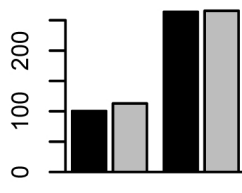

JHA- JHA+

RNA-seq, Col. 2

■ dsUSP

■ dsGFP
