# Supplementary material for: The Transcription Factor Ultraspiracle Influences Honey Bee Social Behavior and Behavior-Related Gene Expression
Source: PubMed Central journal article supplement (PMC3315457; doi:10.1371/journal.pgen.1002596), 2012-03-29
Supplement: pgen.1002596.s008.pdf [file pgen.1002596.s008.pdf]

# Difference in Response to JHA

$\log_2$  ( JHA in dsUSP -- JHA in dsGFP )

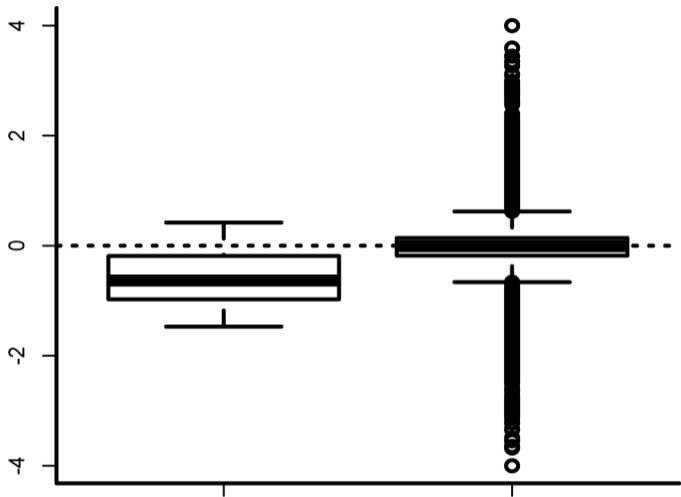

Genes Activated by  
USP and JHA (n=33)

Other Genes  
(n=9484)
