# Supplementary material for: The Transcription Factor Ultraspiracle Influences Honey Bee Social Behavior and Behavior-Related Gene Expression
Source: PubMed Central journal article supplement (PMC3315457; doi:10.1371/journal.pgen.1002596), 2012-03-29

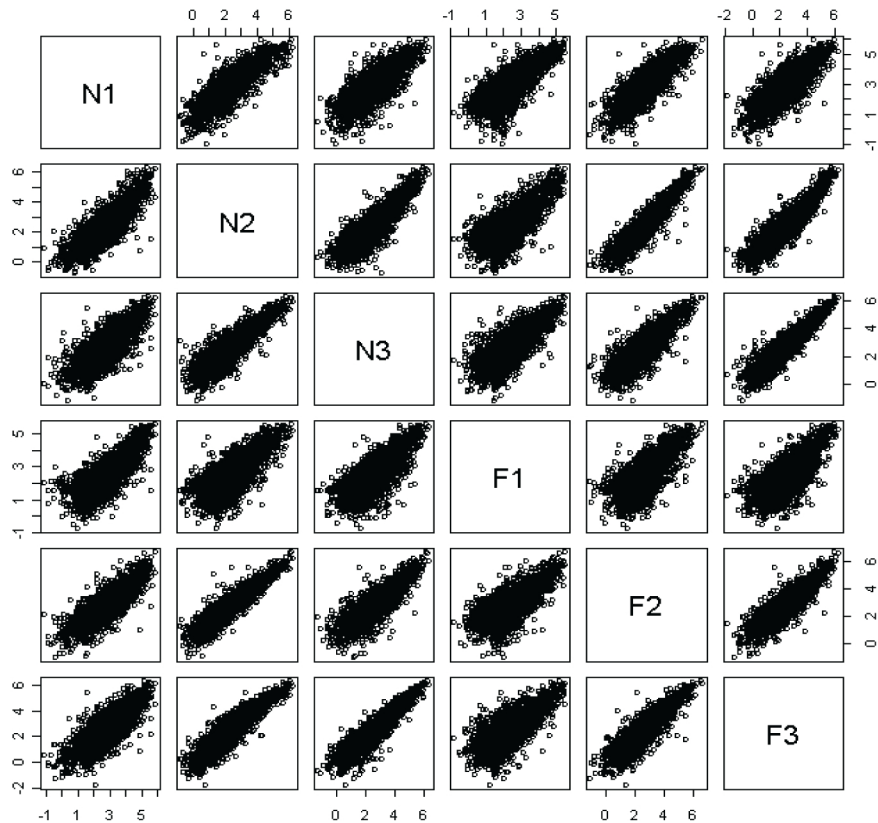

Supplement: pgen.1002596.s009.pdf [file pgen.1002596.s009.pdf]
