# Supplementary material for: The Transcription Factor Ultraspiracle Influences Honey Bee Social Behavior and Behavior-Related Gene Expression
Source: PLoS Genet. 2012 Mar 29;8(3):e1002596. doi: 10.1371/journal.pgen.1002596 (PMC3315457; doi:10.1371/journal.pgen.1002596)
Supplement: Table S2 — USP binding sites characterized by ChIP-chip. For each binding site, we give the chromosomal (group) location, and the locations of any genes located with within 10 kb. (XLS) [file pgen.1002596.s013.xls]

## Sheet: USP_binding_sites_supp_table.cs
group	peak_start	peak_stop	gene	gene_start	gene_stop	gene_strand
Group1.24	840301	841181	GB16461-RA	847617	854584	-
Group1.40	37125	37860	GB13338-RA	47473	48772	-
Group1.44	1	858	GB14784-RA	5669	16314	-
Group1.53	331926	332556	GB10242-RA	321638	322415	+
Group1.53	331926	332556	GB14107-RA	342490	342798	-
Group1.64	311307	311772	GB11468-RA	301163	311252	+
Group1.64	42109	42768	GB14164-RA	47627	84582	-
Group1.64	42109	42768	GB19984-RA	23913	33696	+
Group1.64	42109	42768	GB19984-RB	23913	33696	+
Group1.66	338124	338856	GB13837-RA	348036	351302	-
Group1.67	50720	51459	GB19717-RA	58137	91392	-
Group1.71	177525	178154	GB16226-RA	184323	190028	-
Group1.8	6506	7074	GB30102-RA	7116	184054	-
Group1.9	86426	86868	GB17448-RA	64072	79765	+
Group10.28	134324	134854	GB18850-RA	90098	128536	+
Group10.36	741319	741775	GB17923-RA	750059	753270	-
Group10.40	155811	157257	GB14638-RA	162211	172582	-
Group10.45	319706	320355	GB18311-RA	285189	311391	+
Group10.8	138413	138952	GB18215-RA	139980	160866	-
Group11.28	176508	177262	GB11364-RA	185489	200510	-
Group11.28	176508	177262	GB11364-RB	185489	230167	-
Group11.28	176508	177262	GB11364-RC	185489	264532	-
Group11.28	176508	177262	GB11364-RD	185489	188902	-
Group11.30	344008	344057	GB10642-RA	353819	355068	-
Group11.31	1020219	1020763	GB11950-RA	1024087	1037862	-
Group11.33	576505	577161	GB12542-RA	585787	593460	-
Group11.38	123123	123767	GB11930-RA	132155	135140	-
Group11.39	44922	45573	GB17987-RA	33944	40064	+
Group11.41	222326	222857	GB15191-RA	211739	215575	+
Group11.42	3220	3869	GB16208-RA	12323	14990	-
Group12.17	268214	270177	GB16052-RA	270307	285556	-
Group12.26	102510	103853	GB19265-RA	87876	98282	+
Group12.30	182205	182975	GB10371-RA	80826	178551	+
Group12.4	46508	48063	GB30279-RA	34900	38540	+
Group13.10	129826	130250	GB19794-RA	118692	120567	+
Group13.4	622225	622954	GB12571-RA	611378	613288	+
Group13.5	244204	244851	GB15607-RA	249736	255447	-
Group14.21	272523	273454	GB18222-RA	256832	262639	+
Group14.23	41517	42059	GB14986-RA	50947	52154	-
Group14.23	722426	723270	GB16431-RA	669297	717617	+
Group14.23	711806	712770	GB19664-RA	721995	735974	-
Group14.24	160103	160879	GB17906-RA	146710	152029	+
Group14.24	1398525	1398973	GB20086-RA	1386162	1388630	+
Group15.24	212021	212752	GB13419-RA	200036	202283	+
Group15.24	105409	106563	GB16259-RA	114343	120897	-
Group15.26	50702	51751	GB12883-RA	54915	64961	-
Group15.34	519223	519752	GB11589-RA	508762	510114	+
Group15.34	519223	519752	GB16616-RA	522345	561786	-
Group15.35	598115	598658	GB14472-RA	605221	610991	-
Group15.35	598115	598658	GB16488-RA	585417	593387	+
Group15.37	18212	18865	GB10332-RA	26948	38947	-
Group15.40	13706	14278	GB30580-RA	17509	24454	-
Group16.10	21902	23251	GB18940-RA	9775	13546	+
Group16.11	184313	185160	GB11988-RA	132659	181380	+
Group16.18	481121	482166	GB30070-RA_2	486259	551957	-
Group16.9	725226	725754	GB10341-RA	709230	715878	+
Group2.20	23010	24769	GB19386-RA	6761	19317	+
Group2.31	627720	628055	GB30176-RA	615986	617879	+
Group2.34	303823	304367	GB15917-RA	311325	342711	-
Group2.34	305610	306473	GB15917-RA	311325	342711	-
Group2.35	113905	114454	GB11268-RA	117604	206828	-
Group2.36	379902	380474	GB15437-RA	387826	489598	-
Group2.38	953710	955256	GB10229-RA	938130	948639	+
Group2.38	953710	955256	GB17761-RA	957780	968884	-
Group2.38	865524	866284	GB30192-RA	835711	863569	+
Group2.43	520803	521359	GB11360-RA	509090	512289	+
Group2.43	222626	223370	GB14897-RA	232014	233925	-
Group2.7	13820	14658	GB18205-RA	14777	32500	-
Group3.15	460714	461663	GB18265-RA	469386	476898	-
Group3.16	56125	57270	GB14250-RA	64897	70419	-
Group3.16	72225	72957	GB18566-RA	61747	63267	+
Group3.24	98124	98961	GB12632-RA	85429	88737	+
Group3.33	111821	112466	GB14202-RA	121732	125591	-
Group3.38	161722	162368	GB12930-RA	171755	174418	-
Group3.38	161722	162368	GB16693-RA	172341	174313	-
Group4.22	259704	260153	GB14424-RA	265465	279109	-
Group4.23	1010525	1011254	GB10982-RA	1016793	1030524	-
Group4.23	1010525	1011254	GB10982-RB	1016793	1021436	-
Group4.23	1019904	1020358	GB17469-RA	980733	1012625	+
Group4.23	720717	721875	GB20048-RA	710500	712211	+
Group4.23	823904	824453	GB30207-RA	808390	816790	+
Group4.23	157704	159072	GB30210-RA	24078	157249	+
Group4.27	474302	475355	GB11630-RA	463143	469804	+
Group4.7	988903	989373	GB20051-RA	977787	980505	+
Group4.7	49802	50251	GB20079-RA	35630	40232	+
Group4.7	49802	50251	GB30205-RA	58396	307684	-
Group4.7	49802	50251	GB30205-RB	58396	307684	-
Group4.7	49802	50251	GB30205-RD	58396	307684	-
Group5.21	195023	195657	GB10358-RA	202365	210013	-
Group5.21	301702	302451	GB13440-RA	310928	314428	-
Group5.21	231021	231961	GB17901-RA	220548	224378	+
Group5.33	113224	114975	GB17066-RA	102628	104193	+
Group5.7	220212	220854	GB13160-RA	207207	212747	+
Group6.18	170204	170981	GB16238-RA	153495	166288	+
Group6.28	512510	513364	GB13456-RA	517674	574972	-
Group6.32	291226	291750	GB15612-RA	255786	284030	+
Group7.28	138223	139476	GB16732-RA	127547	131368	+
Group7.29	326222	326654	GB11121-RA	314940	319768	+
Group7.35	927225	927574	GB16607-RA	792575	923688	+
Group7.47	504823	505462	GB16861-RA	469432	503244	+
Group7.6	177323	178363	GB15082-RA	187747	268659	-
Group8.20	866325	866954	GB11343-RA	854333	859611	+
Group8.39	316719	317554	GB12758-RA	300956	311693	+
Group8.44	51114	51671	GB19064-RA	38061	41313	+
Group8.46	182101	182950	GB16705-RA	170688	172950	+
Group9.10	394425	394855	GB15450-RA	400883	460740	-
Group9.2	449224	449776	GB15519-RA	402603	444588	+
Group9.22	208326	208872	GB15696-RA	218400	224438	-
Group9.25	207022	207352	GB17606-RA	193018	201108	+
GroupUn.292	17216	18772	GB30297-RA_2	19819	39001	-
GroupUn.458	19005	19575	GB19194-RA	1738	16627	+
Group1.1	1064915	1065762	GB12075-RA	1066792	1067929	-
Group1.1	1159426	1159950	GB12931-RA	1156360	1172112	+
Group1.1	1064915	1065762	GB14436-RA	1055507	1056587	-
Group1.1	1226615	1227158	GB14808-RA	1231567	1384608	+
Group1.1	1359724	1360666	GB14808-RA	1231567	1384608	+
Group1.1	176910	177356	GB15727-RA	131965	219697	-
Group1.1	199922	200473	GB15727-RA	131965	219697	-
Group1.1	659512	660351	GB19470-RA	659683	660165	-
Group1.18	449017	449456	GB16921-RA	457554	463726	+
Group1.18	449017	449456	GB19445-RA	411509	453015	+
Group1.22	321119	322164	GB10142-RA	325686	328380	-
Group1.22	321119	322164	GB12393-RA	318323	324352	-
Group1.22	321119	322164	GB14221-RA	318323	319141	-
Group1.22	321119	322164	GB15521-RA	240780	335277	+
Group1.22	138725	139784	GB16123-RA	129230	158998	+
Group1.24	113016	113575	GB12554-RA	94120	121340	-
Group1.24	848221	848875	GB16461-RA	847617	854584	-
Group1.26	262810	263356	GB15497-RA	256692	258618	+
Group1.32	43501	44753	GB15064-RA	41155	42282	-
Group1.32	48226	48763	GB15064-RA	41155	42282	-
Group1.35	72806	74153	GB17128-RA	71359	75226	-
Group1.40	316922	317571	GB10180-RA	318076	346387	+
Group1.40	326801	328356	GB10180-RA	318076	346387	+
Group1.40	37125	37860	GB10713-RA	32426	40597	+
Group1.40	37125	37860	GB12475-RA	42727	46950	-
Group1.43	88821	89980	GB15857-RA	66387	99162	-
Group1.44	1	858	GB10225-RA	3668	4291	+
Group1.5	74722	75273	GB12355-RA	35472	134442	-
Group1.5	74722	75273	GB12355-RB	35472	114534	-
Group1.53	173003	173562	GB10152-RA	152131	231359	+
Group1.53	190426	190967	GB10152-RA	152131	231359	+
Group1.53	331926	332556	GB11096-RA	324354	326162	-
Group1.53	331926	332556	GB12218-RA	329754	330446	+
Group1.53	331926	332556	GB13012-RA	333313	333681	-
Group1.53	331926	332556	GB17789-RA	336784	337092	-
Group1.54	92307	92950	GB10613-RA	101599	133795	+
Group1.54	92307	92950	GB11297-RA	99433	100507	-
Group1.54	340805	341854	GB18552-RA	342311	359975	+
Group1.55	144016	144570	GB10650-RA	139097	152445	+
Group1.55	144016	144570	GB10650-RB	137184	152367	+
Group1.55	144016	144570	GB10650-RC	61244	152445	+
Group1.55	88523	89167	GB10650-RC	61244	152445	+
Group1.55	144016	144570	GB10650-RD	61244	152445	+
Group1.55	88523	89167	GB10650-RD	61244	152445	+
Group1.55	302222	302661	GB16181-RB	288575	451987	-
Group1.59	491124	491668	GB14179-RA	452670	496966	-
Group1.6	81626	82375	GB16177-RA	82449	83726	+
Group1.62	293621	294050	GB19438-RA	187408	343021	+
Group1.62	313502	314072	GB19438-RA	187408	343021	+
Group1.64	395916	396472	GB11566-RA	385079	388731	-
Group1.64	74801	75360	GB14164-RA	47627	84582	-
Group1.64	416401	417150	GB16866-RA	412352	433965	-
Group1.66	338124	338856	GB10343-RA	346797	347563	+
Group1.66	159302	159860	GB10494-RA	103597	186411	-
Group1.66	799409	799963	GB12375-RA	806290	817870	+
Group1.66	554815	555554	GB13853-RA	553276	801414	+
Group1.66	799409	799963	GB13853-RA	553276	801414	+
Group1.66	1135922	1136551	GB14122-RA	1144017	1144972	+
Group1.66	1135922	1136551	GB15267-RA	1123307	1133708	-
Group1.66	1296914	1297455	GB19115-RA	1164474	1929000	-
Group1.66	1448420	1448974	GB19115-RA	1164474	1929000	-
Group1.66	1563820	1564365	GB19115-RA	1164474	1929000	-
Group1.66	1567000	1567475	GB19115-RA	1164474	1929000	-
Group1.66	1790804	1791553	GB19115-RA	1164474	1929000	-
Group1.66	1813924	1814673	GB19115-RA	1164474	1929000	-
Group1.66	1870814	1871467	GB19115-RA	1164474	1929000	-
Group1.66	46909	47653	GB19982-RA	34505	100688	-
Group1.7	129223	129553	GB13919-RA	54656	146428	+
Group1.71	624723	625366	GB10373-RA	625748	628150	+
Group1.71	566904	567851	GB10459-RA	566753	580769	+
Group1.71	624723	625366	GB10566-RA	629433	630675	+
Group1.71	624723	625366	GB13207-RA	618268	622460	+
Group1.72	176905	176958	GB30101-RA	30591	240641	-
Group1.72	177402	178470	GB30101-RA	30591	240641	-
Group1.74	276024	276775	GB20094-RA	280901	283502	+
Group1.75	259223	260872	GB10066-RA	213945	260098	-
Group1.78	28419	28969	GB17200-RA	20305	21219	+
Group1.78	28419	28969	GB18733-RA	28374	57320	+
Group1.79	47812	48757	GB15509-RA	36417	55341	+
Group1.79	47812	48757	GB17963-RA	57997	60085	+
Group1.8	21807	22253	GB30102-RA	7116	184054	-
Group1.81	14204	14653	GB18185-RA	13016	113851	+
Group1.81	14826	15957	GB18185-RA	13016	113851	+
Group1.81	2803	3557	GB18185-RA	13016	113851	+
Group1.82	204324	205071	GB12080-RA	146474	243949	+
Group1.82	234004	235151	GB12080-RA	146474	243949	+
Group1.82	782904	783273	GB14440-RA	634277	884314	-
Group1.82	821523	821967	GB14440-RA	634277	884314	-
Group1.9	86426	86868	GB10942-RA	80554	84419	+
Group10.22	44303	44970	GB12434-RA	7278	84639	+
Group10.28	134324	134854	GB11062-RA	142260	151632	+
Group10.29	247312	249366	GB16299-RA	247371	251315	-
Group10.30	140425	140854	GB12774-RA	120438	219891	+
Group10.30	188524	189361	GB12774-RA	120438	219891	+
Group10.31	177624	178153	GB13525-RA	116723	422426	-
Group10.31	336622	337167	GB13525-RA	116723	422426	-
Group10.31	365124	365563	GB13525-RA	116723	422426	-
Group10.32	52625	53675	GB12480-RA	52760	82613	+
Group10.32	73125	73659	GB12480-RA	52760	82613	+
Group10.32	82314	82754	GB12480-RA	52760	82613	+
Group10.33	183724	184263	GB18613-RA	90327	206132	-
Group10.35	18604	19273	GB13445-RA	18536	96647	+
Group10.35	51924	52353	GB13445-RA	18536	96647	+
Group10.36	741319	741775	GB12178-RA	742846	744891	+
Group10.36	741319	741775	GB12766-RA	735637	737489	+
Group10.36	761023	762362	GB13229-RA	757046	782469	-
Group10.36	741319	741775	GB14266-RA	740551	741894	+
Group10.36	741319	741775	GB14289-RA	731790	733184	+
Group10.36	741319	741775	GB14849-RA	745956	747062	+
Group10.36	1092722	1093551	GB16085-RA	1091890	1093680	-
Group10.36	1094103	1095562	GB16085-RA	1091890	1093680	-
Group10.36	741319	741775	GB17516-RA	738329	740057	-
Group10.36	761023	762362	GB17923-RA	750059	753270	-
Group10.36	262412	263051	GB18384-RA	256763	421597	+
Group10.36	288726	289657	GB18384-RA	256763	421597	+
Group10.36	741319	741775	GB19305-RA	748078	749731	+
Group10.37	339005	340269	GB10521-RA	347314	347815	-
Group10.37	339005	340269	GB13641-RA	348410	349163	+
Group10.37	339005	340269	GB18251-RA	344939	346490	-
Group10.39	333401	333970	GB18560-RA	323185	326863	-
Group10.39	101623	102174	GB19998-RA	81862	134276	-
Group10.39	102623	102682	GB19998-RA	81862	134276	-
Group10.40	38625	39562	GB10200-RA	30860	59591	-
Group10.40	155811	157257	GB12770-RA	154367	160801	+
Group10.41	84913	86860	GB11857-RA	84017	85372	-
Group10.42	324302	325451	GB10879-RA	272572	356795	-
Group10.45	87516	88655	GB11405-RA	86601	91055	-
Group11.28	233925	234362	GB11364-RB	185489	230167	-
Group11.28	233925	234362	GB11364-RC	185489	264532	-
Group11.28	260902	261556	GB11364-RC	185489	264532	-
Group11.30	344323	345270	GB10642-RA	353819	355068	-
Group11.31	1392225	1393774	GB10131-RA	1401416	1406160	+
Group11.31	1032405	1034275	GB11950-RA	1024087	1037862	-
Group11.31	1740623	1740961	GB13628-RA	1743697	1745491	+
Group11.31	415826	416561	GB13636-RA	405384	569201	-
Group11.31	516223	516652	GB13636-RA	405384	569201	-
Group11.31	1392225	1393774	GB15420-RA	1398062	1400841	+
Group11.31	1020219	1020763	GB15649-RA	967144	1022211	-
Group11.31	333525	334054	GB16191-RA	333413	334384	-
Group11.31	1342024	1342571	GB16457-RA	1272745	1394758	+
Group11.31	1356418	1356957	GB16457-RA	1272745	1394758	+
Group11.31	1392225	1393774	GB16457-RA	1272745	1394758	+
Group11.31	1599818	1600475	GB17408-RA	1589517	1589975	-
Group11.31	1392225	1393774	GB17600-RA	1395229	1397715	-
Group11.31	333525	334054	GB17920-RA	342410	345139	+
Group11.31	1599818	1600475	GB18443-RA	1601587	1641383	+
Group11.31	1641325	1641761	GB18443-RA	1601587	1641383	+
Group11.31	2071919	2072385	GB19490-RA	2034808	2159809	-
Group11.31	2111222	2111659	GB19490-RA	2034808	2159809	-
Group11.31	1671209	1671668	GB20107-RA	1653640	1689813	+
Group11.31	698221	698875	GB30111-RA	682896	702561	-
Group11.31	703023	703452	GB30111-RA	682896	702561	-
Group11.31	268822	269456	GB30113-RA	278616	283582	+
Group11.33	576505	577161	GB12059-RA	581399	582378	-
Group11.33	435202	435671	GB18621-RA	421763	437622	-
Group11.33	576505	577161	GB18885-RA	583200	585376	+
Group11.33	508408	508972	GB30126-RA	504718	576709	-
Group11.33	576505	577161	GB30126-RA	504718	576709	-
Group11.33	378226	378953	GB30504-RA	341649	395747	-
Group11.34	126	574	GB18041-RA	6266	7606	+
Group11.34	126	574	GB18187-RA	8798	10274	+
Group11.38	123123	123767	GB12893-RA	116151	121293	+
Group11.38	62404	63575	GB18930-RA	35329	72174	+
Group11.38	62404	63575	GB18930-RB	58561	72174	+
Group11.39	44922	45573	GB18909-RA	43028	95272	-
Group11.39	81408	82372	GB18909-RA	43028	95272	-
Group11.39	90202	91556	GB18909-RA	43028	95272	-
Group11.41	83711	84350	GB13815-RA	74664	99754	+
Group11.41	222326	222857	GB15345-RA	216375	234864	+
Group11.42	3220	3869	GB12962-RA	7273	10986	-
Group11.42	3220	3869	GB14831-RA	11445	12269	+
Group11.7	28324	29380	GB15459-RA	23550	28434	-
Group11.9	206323	206781	GB11441-RA	196963	213938	+
Group11.9	46806	47358	GB18111-RA	37602	114035	+
Group11.9	80318	80753	GB18111-RA	37602	114035	+
Group12.1	407202	407753	GB17926-RA	53566	603749	+
Group12.1	439815	440874	GB17926-RA	53566	603749	+
Group12.1	407202	407753	GB17926-RB	41989	603749	+
Group12.1	439815	440874	GB17926-RB	41989	603749	+
Group12.11	38623	39053	GB10111-RA	13553	76953	+
Group12.17	221304	223062	GB13880-RA	58494	222335	-
Group12.20	316604	317153	GB12541-RA	314962	325410	+
Group12.20	1266205	1266975	GB13013-RA	1271691	1373714	+
Group12.20	1290114	1290666	GB13013-RA	1271691	1373714	+
Group12.20	917206	917751	GB13057-RA	880067	1007938	+
Group12.20	1954526	1955270	GB13580-RA	1938567	1952968	-
Group12.20	346303	346852	GB30138-RA	332322	851055	-
Group12.20	346303	346852	GB30138-RB	332322	851055	-
Group12.20	346303	346852	GB30138-RC	332322	851055	-
Group12.20	346303	346852	GB30138-RD	332322	354771	-
Group12.20	346303	346852	GB30138-RE	332322	354771	-
Group12.20	346303	346852	GB30138-RF	332322	354771	-
Group12.20	346303	346852	GB30138-RG	332322	354771	-
Group12.26	102510	103853	GB19183-RA	103752	107433	+
Group12.27	211022	212174	GB30139-RA	187571	210848	-
Group12.27	211022	212174	GB30139-RB	187571	210848	-
Group12.27	327505	327966	GB30140-RA	315254	441300	-
Group12.27	339022	339553	GB30140-RA	315254	441300	-
Group12.27	403524	404159	GB30140-RA	315254	441300	-
Group12.30	1080721	1081060	GB11622-RA	1080877	1114795	-
Group12.30	1080721	1081060	GB15409-RA	1072540	1075365	+
Group12.30	737005	737756	GB16876-RA	708503	790506	-
Group12.30	753802	754466	GB16876-RA	708503	790506	-
Group12.30	182205	182975	GB19330-RA	182482	415825	+
Group12.30	390323	391273	GB19330-RA	182482	415825	+
Group12.30	913911	915675	GB19579-RA	869376	915387	+
Group12.4	46508	48063	GB18464-RA	48495	52599	+
Group12.4	46508	48063	GB19447-RA	43211	47570	+
Group12.4	46508	48063	GB30280-RA	39187	42490	+
Group12.4	46508	48063	GB30281-RA	53638	55461	+
Group12.4	46508	48063	GB30282-RA	55980	57444	+
Group12.5	60106	60655	GB13095-RA	69092	69904	-
Group12.5	60106	60655	GB19948-RA	49746	60833	+
Group13.10	379625	380251	GB11844-RA	379068	398442	-
Group13.10	150423	150952	GB17814-RA	145502	179018	+
Group13.10	507526	508066	GB18866-RA	502887	514704	-
Group13.13	724515	725163	GB14857-RA	721444	723228	+
Group13.13	201522	202154	GB15643-RA	33707	209175	-
Group13.13	201522	202154	GB15643-RB	33707	209175	-
Group13.16	320015	320564	GB16145-RA	317474	320773	-
Group13.17	89925	90475	GB18394-RA	3551	82631	-
Group13.18	75019	75563	GB15328-RA	74931	89377	-
Group13.19	68419	69075	GB10595-RA	34948	75608	+
Group13.19	68419	69075	GB15007-RA	78798	88573	+
Group13.19	106	560	GB17134-RA	607	8756	-
Group13.4	622225	622954	GB13161-RA	614536	624434	-
Group13.4	261002	261251	GB14841-RA	261835	278641	+
Group13.4	261503	262158	GB14841-RA	261835	278641	+
Group13.4	272724	273176	GB14841-RA	261835	278641	+
Group13.5	373419	374757	GB10599-RA	381807	382619	+
Group13.5	400419	400953	GB11281-RA	390571	395175	+
Group13.5	373419	374757	GB14622-RA	351514	371245	-
Group13.5	373419	374757	GB18826-RA	377031	380422	-
Group13.6	420222	420782	GB19937-RA	378741	454144	+
Group13.6	440722	441353	GB19937-RA	378741	454144	+
Group13.6	230315	230854	GB20131-RA	138303	478709	-
Group13.6	232703	233163	GB20131-RA	138303	478709	-
Group13.6	297222	297552	GB20131-RA	138303	478709	-
Group13.6	420222	420782	GB20131-RA	138303	478709	-
Group13.6	440722	441353	GB20131-RA	138303	478709	-
Group13.6	467826	468266	GB20131-RA	138303	478709	-
Group13.9	191823	192775	GB11271-RA	162886	183196	-
Group14.10	96604	97153	GB15632-RA	95730	116452	-
Group14.11	94125	94659	GB19934-RA	99808	206930	+
Group14.13	795524	795974	GB16000-RA	794909	796757	+
Group14.13	440903	441359	GB16656-RA	447737	601143	+
Group14.13	795524	795974	GB18479-RA	802258	851476	+
Group14.15	59017	59672	GB10883-RA	51093	53769	+
Group14.15	59017	59672	GB19082-RA	48593	49899	-
Group14.17	58005	58458	GB11738-RA	27385	109379	-
Group14.17	435122	436562	GB12231-RA	427286	431514	+
Group14.17	435122	436562	GB13223-RA	425385	426230	-
Group14.17	435122	436562	GB14418-RA	431696	432969	+
Group14.17	435122	436562	GB15454-RA	438907	447383	+
Group14.17	435122	436562	GB16904-RA	434112	443174	-
Group14.21	910104	910777	GB10227-RA	897751	941639	+
Group14.21	1012103	1013073	GB15993-RA	959526	1012219	-
Group14.21	997904	998365	GB15993-RA	959526	1012219	-
Group14.21	272523	273454	GB18019-RA	265552	269296	-
Group14.21	272523	273454	GB30164-RA	270708	277058	-
Group14.23	41517	42059	GB10431-RA	45425	47052	+
Group14.23	41517	42059	GB10552-RA	47846	50072	-
Group14.23	639526	639950	GB11654-RA	646789	649767	+
Group14.23	370304	370775	GB16237-RA	343951	393355	+
Group14.23	677601	678250	GB16431-RA	669297	717617	+
Group14.23	711806	712770	GB16431-RA	669297	717617	+
Group14.23	41517	42059	GB16780-RA	43564	44630	-
Group14.23	41517	42059	GB17151-RA	36363	40062	-
Group14.23	766009	766568	GB17397-RA	754386	783248	-
Group14.23	615825	616469	GB19482-RA	603450	616263	-
Group14.23	722426	723270	GB19664-RA	721995	735974	-
Group14.24	160103	160879	GB10449-RA	165242	168478	+
Group14.24	262605	264260	GB12313-RA	259678	293838	-
Group14.24	805803	806952	GB12585-RA	806871	839888	+
Group14.24	160103	160879	GB14256-RA	164120	165090	-
Group14.24	1312018	1313551	GB14790-RA	1311894	1317405	-
Group14.24	1210926	1211250	GB15344-RA	1193899	1258930	+
Group14.24	1213425	1214364	GB15344-RA	1193899	1258930	+
Group14.24	1217124	1217757	GB15344-RA	1193899	1258930	+
Group14.24	1220325	1221154	GB15344-RA	1193899	1258930	+
Group14.24	1232924	1233568	GB15344-RA	1193899	1258930	+
Group14.24	1210926	1211250	GB15344-RD	1193899	1258930	+
Group14.24	1213425	1214364	GB15344-RD	1193899	1258930	+
Group14.24	1217124	1217757	GB15344-RD	1193899	1258930	+
Group14.24	1220325	1221154	GB15344-RD	1193899	1258930	+
Group14.24	1232924	1233568	GB15344-RD	1193899	1258930	+
Group14.24	1398525	1398973	GB17412-RA	1393880	1397807	+
Group14.24	1398525	1398973	GB17412-RB	1391844	1397807	+
Group14.24	160103	160879	GB18650-RA	158941	164027	+
Group14.24	160103	160879	GB18650-RB	158941	164027	+
Group14.24	160103	160879	GB18650-RC	160361	164027	+
Group14.24	1312018	1313551	GB19951-RA	1321921	1326198	+
Group14.24	160103	160879	GB20023-RA	170097	174599	+
Group15.19	17526	18182	GB10804-RA	18961	21770	-
Group15.19	17526	18182	GB14012-RA	15033	18122	+
Group15.19	17526	18182	GB14012-RB	15033	18122	+
Group15.19	17526	18182	GB15338-RA	11403	12434	-
Group15.19	17526	18182	GB17715-RA	14017	14601	-
Group15.19	117420	117954	GB17821-RA	72328	171023	+
Group15.19	17526	18182	GB19572-RA	23510	26175	-
Group15.19	17526	18182	GB30412-RA	8587	10721	-
Group15.19	17526	18182	GB30414-RA	8047	13924	+
Group15.24	206824	207677	GB10057-RA	205079	209185	+
Group15.24	212021	212752	GB10057-RA	205079	209185	+
Group15.24	206824	207677	GB12013-RA	214962	216565	+
Group15.24	212021	212752	GB12013-RA	214962	216565	+
Group15.24	206824	207677	GB13419-RA	200036	202283	+
Group15.24	212021	212752	GB13856-RA	219147	220348	+
Group15.24	212021	212752	GB14757-RA	220436	221874	-
Group15.24	114308	114853	GB16259-RA	114343	120897	-
Group15.24	119016	119553	GB16259-RA	114343	120897	-
Group15.24	125402	126677	GB16259-RA	114343	120897	-
Group15.24	105409	106563	GB16259-RB	114343	115080	-
Group15.24	114308	114853	GB16259-RB	114343	115080	-
Group15.24	119016	119553	GB16259-RB	114343	115080	-
Group15.24	105409	106563	GB17747-RA	103742	104837	-
Group15.24	114308	114853	GB17747-RA	103742	104837	-
Group15.24	206824	207677	GB19626-RA	212094	213814	+
Group15.24	212021	212752	GB19626-RA	212094	213814	+
Group15.24	445025	445554	GB30463-RA_2	449064	449651	+
Group15.24	448217	449261	GB30463-RA_2	449064	449651	+
Group15.26	50702	51751	GB13979-RA	39750	43212	-
Group15.26	50702	51751	GB14645-RA	43469	52845	-
Group15.29	435625	437054	GB15421-RA	410141	433932	-
Group15.29	440023	440565	GB15421-RA	410141	433932	-
Group15.29	113221	113751	GB30052-RA	99469	114271	-
Group15.30	94112	96468	GB10329-RA	86511	87310	+
Group15.30	94112	96468	GB16022-RA	88560	89333	-
Group15.30	94112	96468	GB30034-RA	92411	137166	-
Group15.34	24404	24985	GB11838-RA	34532	36893	+
Group15.34	388203	388981	GB13192-RA	342747	474606	-
Group15.34	24404	24985	GB17712-RA	21293	23445	-
Group15.34	24404	24985	GB17712-RB	21293	23445	-
Group15.34	24404	24985	GB17712-RC	21293	23445	-
Group15.34	24404	24985	GB18693-RA	31267	34066	+
Group15.34	24404	24985	GB18923-RA	14679	20005	-
Group15.34	519223	519752	GB30015-RA	511340	518019	-
Group15.34	519223	519752	GB30015-RB	511340	518019	-
Group15.35	598115	598658	GB11353-RA	596881	604096	-
Group15.40	13706	14278	GB15254-RA	4858	12628	-
Group16.10	21902	23251	GB13491-RA	21984	51748	+
Group16.11	132622	133172	GB11988-RA	132659	181380	+
Group16.11	138222	138872	GB11988-RA	132659	181380	+
Group16.11	141918	142354	GB11988-RA	132659	181380	+
Group16.11	179902	180366	GB11988-RA	132659	181380	+
Group16.11	179902	180366	GB30429-RA	182791	183381	-
Group16.11	184313	185160	GB30429-RA	182791	183381	-
Group16.11	191622	192557	GB30429-RA	182791	183381	-
Group16.12	29913	33361	GB19294-RA	22041	27641	-
Group16.15	67603	68062	GB13997-RA	67946	74971	+
Group16.15	67603	68062	GB30071-RA	7562	120710	+
Group16.15	67603	68062	GB30071-RB	75204	120710	+
Group16.15	67603	68062	GB30071-RE	7562	120710	+
Group16.15	67603	68062	GB30071-RF	7562	120710	+
Group16.15	67603	68062	GB30071-RG	75188	120710	+
Group16.18	492223	493159	GB30070-RA_2	486259	551957	-
Group16.18	493418	493753	GB30070-RA_2	486259	551957	-
Group16.18	75025	75653	GB30436-RA	69618	70114	+
Group16.19	49422	49972	GB11316-RA	8982	71241	-
Group16.19	318324	318968	GB18833-RA	319466	355214	+
Group16.19	354406	355566	GB18833-RA	319466	355214	+
Group16.19	318324	318968	GB30068-RA	306578	309162	-
Group16.20	179921	180475	GB12853-RA	32711	180592	-
Group16.20	179921	180475	GB12853-RB	173078	180592	-
Group16.20	179921	180475	GB12853-RC	32711	180592	-
Group16.20	179921	180475	GB20016-RA	32421	180592	-
Group16.20	319425	319977	GB30062-RA	312064	334030	-
Group16.20	340419	341153	GB30062-RA	312064	334030	-
Group16.20	319425	319977	GB30062-RB	312064	335427	-
Group16.20	340419	341153	GB30062-RB	312064	335427	-
Group16.20	319425	319977	GB30063-RA	299098	310385	-
Group16.21	83401	84057	GB17231-RA	78443	91266	-
Group16.21	83401	84057	GB17489-RA	75702	78072	+
Group16.21	83401	84057	GB17489-RB	75702	78072	+
Group16.9	709024	710251	GB10341-RA	709230	715878	+
Group16.9	192913	193481	GB12262-RA	198076	199341	+
Group16.9	937416	938170	GB19738-RA	937245	966928	+
Group2.11	102518	103156	GB17000-RA	22926	226459	+
Group2.2	69905	70654	GB10844-RA	69738	70535	-
Group2.2	72225	74278	GB10844-RA	69738	70535	-
Group2.20	177802	178268	GB10951-RA	184274	190583	+
Group2.20	177802	178268	GB13541-RA	173195	175146	-
Group2.20	23010	24769	GB15965-RA	19966	38281	-
Group2.20	44201	44668	GB15965-RA	19966	38281	-
Group2.22	34401	35254	GB11029-RA	28692	30003	+
Group2.22	34401	35254	GB13081-RA	30231	32807	-
Group2.22	34401	35254	GB14773-RA	36787	54809	+
Group2.22	34401	35254	GB17092-RA	4462	26839	-
Group2.31	452920	453474	GB11074-RA	459368	462227	-
Group2.31	627720	628055	GB11164-RA	633740	635649	+
Group2.31	627720	628055	GB30174-RA	636334	638105	+
Group2.31	627720	628055	GB30175-RA	626212	627980	+
Group2.31	627720	628055	GB30450-RA	619792	621717	+
Group2.31	627720	628055	GB30451-RA	623618	625494	+
Group2.31	627720	628055	GB30452-RA	629736	631642	+
Group2.34	303823	304367	GB14032-RA	254787	306052	+
Group2.34	305610	306473	GB14032-RA	254787	306052	+
Group2.35	135803	136264	GB11268-RA	117604	206828	-
Group2.36	379902	380474	GB10582-RA	382786	385492	+
Group2.36	379902	380474	GB12924-RA	372343	381154	+
Group2.36	404105	405375	GB15437-RA	387826	489598	-
Group2.36	404105	405375	GB16194-RA	409015	413921	+
Group2.36	890520	891254	GB16234-RA	889832	900910	+
Group2.37	439012	441181	GB10578-RA	430169	433068	-
Group2.37	439012	441181	GB15186-RA	434076	435547	-
Group2.37	439012	441181	GB15263-RA	436223	439302	+
Group2.38	375401	376072	GB12431-RA	383072	390696	+
Group2.38	390214	391058	GB12431-RA	383072	390696	+
Group2.38	126223	126752	GB12566-RA	68565	130184	+
Group2.38	375401	376072	GB14493-RA	376505	377170	+
Group2.38	410315	411358	GB15698-RA	416021	428601	+
Group2.38	413925	414877	GB15698-RA	416021	428601	+
Group2.38	415225	415959	GB15698-RA	416021	428601	+
Group2.38	953710	955256	GB17274-RA	953058	954676	-
Group2.38	959001	960350	GB17274-RA	953058	954676	-
Group2.38	959001	960350	GB17761-RA	957780	968884	-
Group2.38	1024215	1025074	GB17801-RA	1015208	1017316	-
Group2.38	1024215	1025074	GB18192-RA	1018896	1020555	+
Group2.38	722313	722852	GB18541-RA	712373	797922	-
Group2.38	779423	779966	GB18541-RA	712373	797922	-
Group2.38	1024215	1025074	GB18642-RA	1023133	1047039	-
Group2.39	126112	126751	GB19838-RA	120372	186049	-
Group2.39	17004	18753	GB19957-RA	7888	71077	-
Group2.39	21623	22171	GB19957-RA	7888	71077	-
Group2.39	39008	39571	GB19957-RA	7888	71077	-
Group2.39	42304	43068	GB19957-RA	7888	71077	-
Group2.39	68717	69262	GB19957-RA	7888	71077	-
Group2.41	195520	196170	GB10956-RA	189062	202780	-
Group2.41	195520	196170	GB11775-RA	181221	185610	-
Group2.41	195520	196170	GB14050-RA	186479	186791	+
Group2.43	170525	171269	GB11358-RA	163201	231160	+
Group2.43	222626	223370	GB11358-RA	163201	231160	+
Group2.43	520803	521359	GB11591-RA	526241	528724	+
Group2.43	41407	42775	GB12989-RA	31617	32852	+
Group2.43	520803	521359	GB13402-RA	514966	519697	-
Group2.43	271513	272460	GB15551-RA	266174	282806	-
Group2.43	275109	275773	GB15551-RA	266174	282806	-
Group2.43	280605	281175	GB15551-RA	266174	282806	-
Group2.43	520803	521359	GB16605-RA	521277	524151	-
Group2.43	271513	272460	GB16620-RA	250162	264703	-
Group2.43	41407	42775	GB19529-RA	38923	49660	-
Group2.43	280605	281175	GB30166-RA	290030	295971	+
Group2.5	91724	92275	GB10025-RA	95833	96381	+
Group2.6	61603	62055	GB17618-RA	47717	55556	-
Group2.7	44710	45162	GB16416-RA	46914	47798	-
Group2.7	44710	45162	GB30333-RA	42434	43040	+
Group2.7	13820	14658	GB30513-RA_1	307	9884	-
Group3.10	134122	134672	GB10759-RA	125412	227701	-
Group3.10	134123	134452	GB10759-RA	125412	227701	-
Group3.12	116424	117476	GB10569-RA	114536	147607	-
Group3.12	148221	149455	GB10569-RA	114536	147607	-
Group3.15	460714	461663	GB12786-RA	452841	454639	-
Group3.15	460714	461663	GB16196-RA	461335	465928	+
Group3.16	56125	57270	GB12344-RA	58892	60613	+
Group3.16	56125	57270	GB14183-RA	47042	57604	-
Group3.16	56125	57270	GB14183-RB	38889	56322	-
Group3.16	72225	72957	GB14250-RA	64897	70419	-
Group3.16	56125	57270	GB18566-RA	61747	63267	+
Group3.18	534915	535373	GB14685-RA	529671	549658	+
Group3.19	42117	42861	GB13778-RA	32923	121113	+
Group3.21	272723	273467	GB12947-RA	247223	274096	+
Group3.22	263820	264659	GB17380-RA	238782	268121	-
Group3.24	98124	98961	GB10095-RA	101372	101950	-
Group3.24	98124	98961	GB10413-RA	93782	99610	+
Group3.24	98124	98961	GB11314-RA	104398	110041	+
Group3.24	98124	98961	GB13023-RA	89293	91877	-
Group3.24	98124	98961	GB15286-RA	102054	103577	-
Group3.25	931618	932252	GB10253-RA	938839	939545	+
Group3.25	931618	932252	GB12966-RA	863313	955885	-
Group3.25	1001424	1001968	GB14752-RA	1004815	1014251	+
Group3.25	931618	932252	GB17500-RA	931432	932983	+
Group3.25	559505	559964	GB19764-RA	529235	658516	+
Group3.26	186805	187954	GB11503-RA	193996	226307	+
Group3.26	186805	187954	GB13765-RA	177315	178959	+
Group3.26	51023	51558	GB15270-RA	12743	117716	-
Group3.26	73822	74554	GB15270-RA	12743	117716	-
Group3.26	186805	187954	GB19945-RA	186714	190662	-
Group3.28	102223	102761	GB11008-RA	88535	192041	+
Group3.28	82903	83558	GB11008-RA	88535	192041	+
Group3.29	146625	147563	GB16665-RA	157168	157509	+
Group3.29	146625	147563	GB18294-RA	65303	156047	-
Group3.31	281701	282271	GB16863-RA	285311	316631	+
Group3.31	281702	282151	GB16863-RA	285311	316631	+
Group3.31	290625	292261	GB16863-RA	285311	316631	+
Group3.31	293702	294158	GB16863-RA	285311	316631	+
Group3.33	111821	112466	GB10604-RA	119223	121384	+
Group3.33	116625	116971	GB10604-RA	119223	121384	+
Group3.33	116625	116971	GB12610-RA	126879	127834	+
Group3.33	116625	116971	GB14202-RA	121732	125591	-
Group3.33	19422	20166	GB30197-RA	11070	38745	+
Group3.33	25903	26663	GB30197-RA	11070	38745	+
Group3.33	25904	26563	GB30197-RA	11070	38745	+
Group3.33	28702	29256	GB30197-RA	11070	38745	+
Group3.36	555523	556274	GB11926-RA	544770	545645	-
Group3.36	8116	10667	GB12386-RA	4705	5914	+
Group3.36	8116	10667	GB13359-RA	3079	4331	-
Group3.36	8116	10667	GB19473-RA	8029	11314	-
Group4.10	15321	16060	GB12061-RA	23425	25775	-
Group4.10	15321	16060	GB14881-RA	7104	13189	+
Group4.10	15321	16060	GB16564-RA	18922	21710	+
Group4.13	529110	529650	GB10119-RA	533287	930078	+
Group4.13	1038424	1038958	GB11168-RA	1006146	1223318	+
Group4.13	1196321	1196759	GB11168-RA	1006146	1223318	+
Group4.13	57003	57760	GB13787-RA	53516	57282	+
Group4.13	529110	529650	GB18524-RA	524632	528120	+
Group4.13	57003	57760	GB19102-RA	66769	73262	+
Group4.15	414026	415350	GB11420-RA	362813	415512	+
Group4.15	780326	781063	GB14149-RA	778013	780562	+
Group4.15	27205	28666	GB15295-RA	28176	57296	-
Group4.15	38005	38554	GB15295-RA	28176	57296	-
Group4.19	82908	83752	GB12972-RA	82613	83896	-
Group4.19	87210	88061	GB12972-RA	82613	83896	-
Group4.22	89311	89771	GB10633-RA	92918	93373	+
Group4.22	747125	747564	GB11582-RA	737491	738992	-
Group4.22	747809	748881	GB11582-RA	737491	738992	-
Group4.22	747125	747564	GB11860-RA	749317	751333	-
Group4.22	747809	748881	GB11860-RA	749317	751333	-
Group4.22	666624	666963	GB11944-RA	662091	676174	-
Group4.22	89311	89771	GB12394-RA	96646	99769	-
Group4.22	747125	747564	GB13306-RA	744640	746056	+
Group4.22	747809	748881	GB13306-RA	744640	746056	+
Group4.22	747125	747564	GB13739-RA	740514	744389	-
Group4.22	747809	748881	GB13739-RA	740514	744389	-
Group4.22	270622	271573	GB14424-RA	265465	279109	-
Group4.22	272204	272656	GB14424-RA	265465	279109	-
Group4.22	89311	89771	GB14998-RA	89250	90311	-
Group4.22	361026	361457	GB19887-RA	283668	438685	-
Group4.23	205901	206850	GB10517-RA	215332	216561	+
Group4.23	208216	209363	GB10517-RA	215332	216561	+
Group4.23	209403	209871	GB10517-RA	215332	216561	+
Group4.23	1019904	1020358	GB10982-RA	1016793	1030524	-
Group4.23	1025223	1026857	GB10982-RA	1016793	1030524	-
Group4.23	1031806	1033450	GB10982-RA	1016793	1030524	-
Group4.23	1040026	1040568	GB10982-RA	1016793	1030524	-
Group4.23	1019904	1020358	GB10982-RB	1016793	1021436	-
Group4.23	1025223	1026857	GB10982-RB	1016793	1021436	-
Group4.23	720717	721875	GB11116-RA	731347	749770	+
Group4.23	935312	935887	GB11595-RA	928594	980691	+
Group4.23	976603	977572	GB11595-RA	928594	980691	+
Group4.23	1025223	1026857	GB13261-RA	1030798	1035805	-
Group4.23	1031806	1033450	GB13261-RA	1030798	1035805	-
Group4.23	1040026	1040568	GB13261-RA	1030798	1035805	-
Group4.23	720717	721875	GB14985-RA	725323	726351	+
Group4.23	823904	824453	GB16103-RA	818049	819845	-
Group4.23	442615	443174	GB16197-RA	378341	447167	-
Group4.23	720717	721875	GB16355-RA	718938	720479	-
Group4.23	720717	721875	GB16589-RA	726898	729122	-
Group4.23	823904	824453	GB17161-RA	821204	822882	-
Group4.23	823904	824453	GB17329-RA	828261	829235	-
Group4.23	720717	721875	GB17419-RA	712278	714376	-
Group4.23	1010525	1011254	GB17469-RA	980733	1012625	+
Group4.23	976603	977572	GB17469-RA	980733	1012625	+
Group4.23	993024	994466	GB17469-RA	980733	1012625	+
Group4.23	999824	1000674	GB17469-RA	980733	1012625	+
Group4.23	823904	824453	GB18223-RA	830129	832208	+
Group4.23	574125	575350	GB30209-RA	553621	608311	-
Group4.23	124414	124851	GB30210-RA	24078	157249	+
Group4.23	139222	139957	GB30210-RA	24078	157249	+
Group4.23	149120	149854	GB30210-RA	24078	157249	+
Group4.23	25114	26259	GB30210-RA	24078	157249	+
Group4.23	33911	34252	GB30210-RA	24078	157249	+
Group4.23	87101	87775	GB30210-RA	24078	157249	+
Group4.23	94507	95261	GB30210-RA	24078	157249	+
Group4.23	124414	124851	GB30210-RB	24078	126402	+
Group4.23	25114	26259	GB30210-RB	24078	126402	+
Group4.23	33911	34252	GB30210-RB	24078	126402	+
Group4.23	87101	87775	GB30210-RB	24078	126402	+
Group4.23	94507	95261	GB30210-RB	24078	126402	+
Group4.24	15717	17272	GB10138-RA	24745	36781	+
Group4.24	29710	30474	GB10138-RA	24745	36781	+
Group4.24	15717	17272	GB12778-RA	19707	23415	-
Group4.24	29710	30474	GB12778-RA	19707	23415	-
Group4.24	29710	30474	GB18306-RA	37096	38405	+
Group4.27	184723	185071	GB11000-RA	193115	193868	-
Group4.27	185122	185755	GB11000-RA	193115	193868	-
Group4.27	184723	185071	GB11410-RA	166101	190583	+
Group4.27	185122	185755	GB11410-RA	166101	190583	+
Group4.27	289411	290966	GB11807-RA	289530	307431	-
Group4.27	289411	290966	GB12490-RA	270987	279903	-
Group4.27	206324	206757	GB12742-RA	197556	244722	-
Group4.27	474302	475355	GB30199-RA	474468	646880	-
Group4.27	481714	482858	GB30199-RA	474468	646880	-
Group4.27	487725	488259	GB30199-RA	474468	646880	-
Group4.27	541904	542368	GB30199-RA	474468	646880	-
Group4.27	615826	616670	GB30199-RA	474468	646880	-
Group4.7	49802	50251	GB11245-RA	45504	50900	+
Group4.7	1660413	1661067	GB12449-RA	1646058	1661133	+
Group4.7	1505922	1506484	GB16572-RA	1478082	1573889	-
Group4.7	352720	353356	GB18397-RA	328598	378805	-
Group4.7	363023	363872	GB18397-RA	328598	378805	-
Group4.7	352720	353356	GB18397-RB	328598	378805	-
Group4.7	363023	363872	GB18397-RB	328598	378805	-
Group4.7	1660413	1661067	GB30202-RA	1670394	1671421	+
Group4.7	1660413	1661067	GB30203-RA	1663800	1664480	+
Group4.7	1660413	1661067	GB30204-RA	1656489	1657815	-
Group4.7	102918	103958	GB30205-RA	58396	307684	-
Group4.7	177112	177573	GB30205-RA	58396	307684	-
Group4.7	210926	211354	GB30205-RA	58396	307684	-
Group4.7	227824	228173	GB30205-RA	58396	307684	-
Group4.7	91113	92378	GB30205-RA	58396	307684	-
Group4.7	102918	103958	GB30205-RB	58396	307684	-
Group4.7	177112	177573	GB30205-RB	58396	307684	-
Group4.7	210926	211354	GB30205-RB	58396	307684	-
Group4.7	227824	228173	GB30205-RB	58396	307684	-
Group4.7	91113	92378	GB30205-RB	58396	307684	-
Group4.7	102918	103958	GB30205-RD	58396	307684	-
Group4.7	177112	177573	GB30205-RD	58396	307684	-
Group4.7	210926	211354	GB30205-RD	58396	307684	-
Group4.7	227824	228173	GB30205-RD	58396	307684	-
Group4.7	91113	92378	GB30205-RD	58396	307684	-
Group5.10	73317	73860	GB18796-RA	21382	66892	-
Group5.11	446805	448767	GB13431-RA	449775	454459	+
Group5.11	446805	448767	GB18027-RA	441380	445569	+
Group5.12	845304	845973	GB10576-RA	822465	856299	+
Group5.12	1424206	1424855	GB13030-RA	1382105	1500680	+
Group5.12	1254523	1255068	GB17213-RA	1253878	1259064	-
Group5.12	1269920	1270450	GB19918-RA	1279768	1282019	+
Group5.16	255816	256471	GB18348-RA	211247	629912	+
Group5.16	325025	325581	GB18348-RA	211247	629912	+
Group5.16	382410	382875	GB18348-RA	211247	629912	+
Group5.16	405726	406150	GB18348-RA	211247	629912	+
Group5.16	442224	442874	GB18348-RA	211247	629912	+
Group5.16	455912	456753	GB18348-RA	211247	629912	+
Group5.16	463912	464461	GB18348-RA	211247	629912	+
Group5.18	39101	40350	GB10727-RA	39347	184962	+
Group5.18	220313	220758	GB13969-RA	195063	229954	-
Group5.21	301702	302451	GB11718-RA	305233	307130	+
Group5.21	195023	195657	GB13750-RA	189680	197685	+
Group5.21	231021	231961	GB15931-RA	236987	254714	+
Group5.21	301702	302451	GB16784-RA	261289	302487	-
Group5.21	195023	195657	GB19081-RA	198542	201369	-
Group5.21	301702	302451	GB19170-RA	307410	308572	+
Group5.22	591910	594450	GB18706-RA	592428	594433	-
Group5.24	4223	4976	GB14249-RA	10157	11547	+
Group5.24	4223	4976	GB17288-RA	14973	20367	+
Group5.25	275404	275852	GB10714-RA	270173	270640	+
Group5.25	144626	145959	GB15652-RA	19684	229610	-
Group5.25	25523	26854	GB15652-RA	19684	229610	-
Group5.25	275404	275852	GB16786-RA	271685	297773	+
Group5.26	521314	521868	GB17838-RA	501496	592908	+
Group5.29	212710	213266	GB10564-RA	205428	232728	+
Group5.29	143825	144362	GB12802-RA	148868	152382	-
Group5.33	322104	322973	GB11229-RA	320844	329795	-
Group5.33	323404	324572	GB11229-RA	320844	329795	-
Group5.33	156814	158050	GB11241-RA	149301	158526	+
Group5.33	113224	114975	GB11474-RA	115270	116626	+
Group5.33	195524	198055	GB13477-RA	198821	206699	-
Group5.33	207825	208359	GB13477-RA	198821	206699	-
Group5.33	213902	214251	GB13477-RA	198821	206699	-
Group5.33	113224	114975	GB15346-RA	122260	143967	+
Group5.33	113224	114975	GB16101-RA	106644	107045	+
Group5.33	322104	322973	GB16529-RA	310354	314676	-
Group5.33	323404	324572	GB16529-RA	310354	314676	-
Group5.33	113224	114975	GB18273-RA	117851	120836	-
Group5.33	156814	158050	GB19658-RA	147363	148246	+
Group5.33	213902	214251	GB20112-RA	222442	223292	-
Group5.4	654405	654954	GB13244-RA	588254	644505	-
Group5.4	19313	19873	GB14672-RA	4948	549509	+
Group5.4	298903	299457	GB14672-RA	4948	549509	+
Group5.7	220212	220854	GB11942-RA	222116	222517	+
Group5.7	220212	220854	GB14143-RA	217209	221141	-
Group5.7	220212	220854	GB15826-RA	216017	216920	-
Group5.7	220212	220854	GB18380-RA	223016	236093	+
Group5.7	220212	220854	GB18843-RA	213036	214828	-
Group5.8	93122	94062	GB19297-RA	83166	83916	+
Group6.12	102003	102658	GB14519-RA	110503	112501	+
Group6.12	220225	220671	GB17560-RA	213365	216093	+
Group6.15	209105	210781	GB19728-RA	139022	236636	-
Group6.18	170204	170981	GB15174-RA	167076	170806	+
Group6.19	265023	265857	GB16414-RA	221400	306410	+
Group6.21	671125	671671	GB11402-RA	663978	664169	-
Group6.21	671125	671671	GB13753-RA	648051	661151	-
Group6.21	115118	115778	GB16014-RA	40869	256485	-
Group6.21	226822	227154	GB16014-RA	40869	256485	-
Group6.21	620310	621860	GB16598-RA	617206	625019	+
Group6.21	620310	621860	GB18968-RA	629254	634643	+
Group6.22	13610	14756	GB15119-RA	13103	14128	-
Group6.22	13610	14756	GB16854-RA	857	6165	-
Group6.22	13610	14756	GB18419-RA	8125	10357	-
Group6.22	13610	14756	GB18906-RA	19817	23341	-
Group6.26	132322	133074	GB11858-RA	93760	173124	+
Group6.26	132322	133074	GB11858-RB	93760	173124	+
Group6.26	132322	133074	GB11858-RC	93760	173124	+
Group6.26	132322	133074	GB11858-RD	93760	173124	+
Group6.27	110622	111155	GB17651-RA	119617	120446	-
Group6.27	110622	111155	GB19640-RA	24109	116473	-
Group6.28	99904	100758	GB12189-RA	95622	97062	-
Group6.28	735426	735876	GB30226-RA	635241	747637	-
Group6.28	735426	735876	GB30226-RB	635241	729902	-
Group6.29	96525	96769	GB15419-RA	89404	157895	-
Group6.29	97026	97553	GB15419-RA	89404	157895	-
Group6.32	324026	324776	GB11664-RA	302764	343951	-
Group6.32	909411	909968	GB17302-RA	900400	902647	-
Group6.33	54902	55356	GB11556-RA	52408	57451	+
Group6.34	484023	484955	GB11946-RA	334225	556849	+
Group6.40	148516	152173	GB14651-RA	149211	152744	+
Group6.43	171522	172166	GB10677-RA	175155	179621	+
Group6.43	171522	172166	GB16478-RA	26614	172150	+
Group6.43	37402	38050	GB16478-RA	26614	172150	+
Group6.45	55618	56172	GB17100-RA	44041	104982	-
Group6.45	65407	66054	GB17100-RA	44041	104982	-
Group6.45	67600	68055	GB17100-RA	44041	104982	-
Group6.45	81825	82959	GB17100-RA	44041	104982	-
Group6.49	292623	293355	GB10322-RA	127944	292943	-
Group6.52	83220	84064	GB12581-RA	91005	97481	+
Group6.52	83220	84064	GB15893-RA	86661	88312	+
Group6.52	83220	84064	GB18340-RA	78883	82380	+
Group6.52	83220	84064	GB30331-RA	82488	84424	-
Group6.55	103505	103972	GB17945-RA	59138	446829	-
Group6.55	127114	129072	GB17945-RA	59138	446829	-
Group6.55	143302	143852	GB17945-RA	59138	446829	-
Group6.55	166225	167057	GB17945-RA	59138	446829	-
Group6.55	196113	196680	GB17945-RA	59138	446829	-
Group6.55	257310	257981	GB17945-RA	59138	446829	-
Group6.55	282926	283452	GB17945-RA	59138	446829	-
Group6.55	342122	342664	GB17945-RA	59138	446829	-
Group6.55	376616	377250	GB17945-RA	59138	446829	-
Group6.55	59114	59558	GB17945-RA	59138	446829	-
Group6.55	60111	60851	GB17945-RA	59138	446829	-
Group6.55	60112	60666	GB17945-RA	59138	446829	-
Group6.55	75819	76773	GB17945-RA	59138	446829	-
Group7.12	210410	211178	GB10067-RA	220559	298354	+
Group7.13	381601	382162	GB10354-RA	380627	384815	+
Group7.13	381601	382162	GB11166-RA	373518	377537	+
Group7.13	204424	205853	GB12861-RA	91643	207239	+
Group7.13	381601	382162	GB16889-RA	388166	393279	+
Group7.13	381601	382162	GB17417-RA	379233	380043	+
Group7.14	107605	108654	GB18853-RA	113962	116959	+
Group7.16	166902	167556	GB12727-RA	170431	171418	+
Group7.16	166902	167556	GB15835-RA	92515	174089	-
Group7.16	166902	167556	GB19867-RA	174382	177155	+
Group7.17	25914	26368	GB11509-RA	8445	43460	+
Group7.28	138223	139476	GB13199-RA	135979	151312	-
Group7.29	326222	326654	GB19618-RA	325978	328603	-
Group7.3	157026	157360	GB17667-RA	156782	158455	-
Group7.35	834802	835374	GB16607-RA	792575	923688	+
Group7.35	871702	872464	GB16607-RA	792575	923688	+
Group7.35	905709	906250	GB16607-RA	792575	923688	+
Group7.37	24702	25659	GB11105-RA	24830	25930	-
Group7.37	24702	25659	GB11149-RA	14893	21699	-
Group7.39	111317	111851	GB16056-RA	95466	115664	-
Group7.42	133121	133658	GB10116-RA	126477	126827	+
Group7.42	133121	133658	GB13693-RA	136857	138308	+
Group7.42	133121	133658	GB19463-RA	131403	133342	+
Group7.46	533210	533960	GB14811-RA	532298	533080	-
Group7.47	439423	439855	GB11939-RA	443466	445541	+
Group7.47	439423	439855	GB17148-RA	446449	452224	+
Group7.47	100324	101555	GB30234-RA	68364	124312	+
Group8.11	88424	89060	GB15150-RA	36071	88769	+
Group8.16	116520	117050	GB14400-RA	111823	332607	+
Group8.16	148214	148873	GB14400-RA	111823	332607	+
Group8.16	163918	165259	GB14400-RA	111823	332607	+
Group8.16	174604	175054	GB14400-RA	111823	332607	+
Group8.16	180419	181363	GB14400-RA	111823	332607	+
Group8.16	184606	185175	GB14400-RA	111823	332607	+
Group8.16	206101	206865	GB14400-RA	111823	332607	+
Group8.16	215812	216269	GB14400-RA	111823	332607	+
Group8.16	235723	236652	GB14400-RA	111823	332607	+
Group8.16	289801	290352	GB14400-RA	111823	332607	+
Group8.19	683724	684557	GB19929-RA	411085	866409	+
Group8.20	866325	866954	GB11901-RA	865256	999119	-
Group8.24	519823	520152	GB18150-RA	434492	588705	-
Group8.26	182416	182865	GB14873-RA	144169	264560	+
Group8.26	221407	222154	GB14873-RA	144169	264560	+
Group8.28	186322	187280	GB11761-RA	184147	256884	-
Group8.28	238823	240056	GB11761-RA	184147	256884	-
Group8.28	248102	249566	GB11761-RA	184147	256884	-
Group8.28	256615	257569	GB11761-RA	184147	256884	-
Group8.29	273326	273775	GB16304-RA	209284	291491	+
Group8.29	76815	78354	GB19128-RA	76743	80865	+
Group8.29	78805	80459	GB19128-RA	76743	80865	+
Group8.29	86125	87879	GB19128-RA	76743	80865	+
Group8.33	47724	48658	GB18244-RA	47241	71652	+
Group8.35	141813	142482	GB16079-RA	128504	132965	-
Group8.39	336904	337753	GB10347-RA	335518	337355	-
Group8.39	336904	337753	GB12657-RA	331975	333942	-
Group8.39	336904	337753	GB15046-RA	339364	353660	+
Group8.42	551301	552757	GB12796-RA	549776	554835	-
Group8.42	373705	374054	GB14004-RA	382470	383415	+
Group8.42	373705	374054	GB14071-RA	373057	376843	-
Group8.42	64403	64972	GB19563-RA	25994	86930	+
Group8.42	586120	586674	GB30236-RA	582713	602967	-
Group8.42	588511	589455	GB30236-RA	582713	602967	-
Group8.44	51114	51671	GB10069-RA	49767	49943	+
Group8.44	51114	51671	GB12286-RA	53841	58958	+
Group8.44	51114	51671	GB15210-RA	51719	52174	-
Group8.44	51114	51671	GB19724-RA	42417	45410	+
Group8.46	182101	182950	GB13241-RA	176702	178469	+
Group8.46	182101	182950	GB30329-RA	178877	212106	-
Group8.46	182101	182950	GB30329-RB	178877	198689	-
Group8.46	182101	182950	GB30329-RC	178877	212106	-
Group8.46	182101	182950	GB30329-RD	178877	212106	-
Group8.46	182101	182950	GB30329-RE	178877	212106	-
Group8.5	10201	11881	GB30239-RA	9941	131419	-
Group8.5	79714	80673	GB30239-RA	9941	131419	-
Group8.5	92923	93567	GB30239-RA	9941	131419	-
Group8.5	10201	11881	GB30239-RB	10815	128613	-
Group8.5	79714	80673	GB30239-RB	10815	128613	-
Group8.5	92923	93567	GB30239-RB	10815	128613	-
Group8.7	51325	51850	GB14649-RA	30141	54164	-
Group9.10	551825	552375	GB11180-RA	560225	770795	+
Group9.10	551825	552375	GB17617-RA	515711	544562	-
Group9.13	142105	142669	GB15733-RA	136758	144933	-
Group9.13	118103	119357	GB16340-RA	26114	119422	+
Group9.13	27303	27772	GB16340-RA	26114	119422	+
Group9.13	31804	32363	GB16340-RA	26114	119422	+
Group9.13	142105	142669	GB18947-RA	148896	157363	+
Group9.18	188126	188556	GB16412-RA	179375	180670	+
Group9.18	188126	188556	GB16648-RA	186520	215377	-
Group9.21	266212	266975	GB12663-RA	265433	275868	-
Group9.21	266212	266975	GB16170-RA	252926	256988	-
Group9.22	278307	278851	GB14634-RA	261691	273635	-
Group9.22	278307	278851	GB15280-RA	279207	300233	+
Group9.22	208326	208872	GB16973-RA	214072	214617	-
Group9.22	208326	208872	GB17395-RA	205747	206472	-
Group9.23	17011	17659	GB13683-RA	9702	17973	-
Group9.23	1277519	1278754	GB18182-RA	1269403	1296201	+
Group9.23	88923	89362	GB18290-RA	51918	298421	-
Group9.23	90203	90874	GB18290-RA	51918	298421	-
Group9.24	728524	729353	GB11197-RA	732255	771749	+
Group9.24	792704	793664	GB12211-RA	790656	794754	+
Group9.24	792704	793664	GB13198-RA	798535	800411	-
Group9.24	809723	810074	GB13198-RA	798535	800411	-
Group9.24	809723	810074	GB17008-RA	809766	815155	-
Group9.25	233623	234253	GB13825-RA	233504	238553	+
Group9.25	417004	417651	GB14416-RA	425020	426564	-
Group9.25	424322	424751	GB14416-RA	425020	426564	-
Group9.25	425102	426051	GB14416-RA	425020	426564	-
Group9.25	427117	427656	GB14416-RA	425020	426564	-
Group9.25	292202	292672	GB15492-RA	292546	300300	+
Group9.25	207022	207352	GB19882-RA	202307	206434	-
Group9.25	233623	234253	GB30246-RA	241375	244685	+
Group9.7	101125	102354	GB12735-RA	104865	107900	-
Group9.7	102923	103176	GB12735-RA	104865	107900	-
GroupUn.120	2301	2963	GB12913-RA	2880	5023	-
GroupUn.120	2301	2963	GB15076-RA	6860	18592	+
GroupUn.1225	10903	11565	GB12606-RA	17851	20027	+
GroupUn.1225	10903	11565	GB13885-RA	37	17610	-
GroupUn.1339	226	853	GB16126-RA	199	987	-
GroupUn.1408	9302	9763	GB15642-RA	5993	12072	+
GroupUn.1513	20023	20468	GB12687-RA	17069	17571	+
GroupUn.1513	20023	20468	GB19879-RA	6608	10944	-
GroupUn.154	13903	14356	GB13749-RA	5227	9688	-
GroupUn.154	13903	14356	GB15202-RA	22842	23765	+
GroupUn.154	13903	14356	GB15596-RA	2157	4364	-
GroupUn.154	13903	14356	GB18101-RA	24145	26496	+
GroupUn.154	13903	14356	GB18685-RA	12439	18837	-
GroupUn.1707	5	658	GB15788-RA	83	646	-
GroupUn.1707	6	581	GB15788-RA	83	646	-
GroupUn.1758	26	1361	GB16489-RA	56	1183	+
GroupUn.1835	1	759	GB16062-RA	144	440	-
GroupUn.1835	924	1364	GB16062-RA	144	440	-
GroupUn.1853	126	1078	GB18970-RA	79	1134	+
GroupUn.2191	526	1356	GB17234-RA	49	949	+
GroupUn.2216	322	860	GB14912-RA	361	1242	-
GroupUn.2230	100	1052	GB11094-RA	64	930	-
GroupUn.2230	101	960	GB11094-RA	64	930	-
GroupUn.2257	21	1151	GB17077-RA	46	1210	+
GroupUn.2282	216	776	GB16347-RA	145	1633	+
GroupUn.230	38326	38756	GB12981-RA	29934	32570	+
GroupUn.230	38326	38756	GB14280-RA	39480	41395	-
GroupUn.230	38326	38756	GB19285-RA	27149	28776	-
GroupUn.2384	411	1770	GB19744-RA	885	1790	+
GroupUn.2384	411	1770	GB20135-RA	250	435	-
GroupUn.246	59013	59457	GB15021-RA	52363	53533	+
GroupUn.246	59013	59457	GB17276-RA	60683	63807	-
GroupUn.2536	411	1083	GB19926-RA	33	1115	+
GroupUn.2546	101	1761	GB15935-RA	196	2720	-
GroupUn.2546	2123	2755	GB15935-RA	196	2720	-
GroupUn.2627	326	1251	GB12216-RA	394	1266	+
GroupUn.2627	326	1251	GB12755-RA	39	305	+
GroupUn.2742	6	1051	GB13149-RA	107	820	+
GroupUn.2748	26	1063	GB14367-RA	133	1224	+
GroupUn.291	6808	7459	GB10853-RA	2340	5180	-
GroupUn.291	7712	8460	GB10853-RA	2340	5180	-
GroupUn.291	6808	7459	GB18395-RA	14662	17994	+
GroupUn.291	7712	8460	GB18395-RA	14662	17994	+
GroupUn.291	6808	7459	GB19408-RA	9351	12706	-
GroupUn.291	7712	8460	GB19408-RA	9351	12706	-
GroupUn.292	17216	18772	GB19760-RA	16500	16604	-
GroupUn.3080	6	957	GB12233-RA	10	636	-
GroupUn.3101	201	962	GB14917-RA	444	986	+
GroupUn.3127	525	985	GB18343-RA	540	1214	-
GroupUn.3128	26	953	GB12992-RA	1	366	+
GroupUn.3152	1	351	GB18593-RA	1	648	+
GroupUn.3166	226	1262	GB11736-RA	425	1034	+
GroupUn.3185	122	680	GB12197-RA	560	1030	-
GroupUn.3229	26	1155	GB10027-RA	111	1046	-
GroupUn.3351	1622	2159	GB15348-RA	43	2089	-
GroupUn.3411	30124	30681	GB12187-RA	20953	45708	+
GroupUn.3473	426	1350	GB14464-RA	772	1368	-
GroupUn.348	41004	41674	GB20010-RA	42979	59425	+
GroupUn.3539	11	463	GB17318-RA	200	1040	-
GroupUn.354	25324	25968	GB30186-RA_1	21773	27949	-
GroupUn.3552	704	1256	GB12255-RA	36	839	+
GroupUn.3552	704	1256	GB16228-RA	889	1266	-
GroupUn.3575	621	960	GB14661-RA	369	1016	-
GroupUn.3583	26	1076	GB11780-RA	48	689	+
GroupUn.3605	121	1658	GB16993-RA	61	1646	-
GroupUn.3623	6	970	GB14449-RA	101	1045	-
GroupUn.3628	926	1670	GB13020-RA	303	830	-
GroupUn.3628	926	1670	GB17297-RA	903	1697	-
GroupUn.3743	26	1161	GB17880-RA	13	885	+
GroupUn.381	4821	6152	GB30507-RA	3009	14069	+
GroupUn.3888	26	1555	GB18103-RA	26	1486	-
GroupUn.3893	301	972	GB14716-RA	398	1195	-
GroupUn.3928	725	1281	GB10963-RA	56	706	-
GroupUn.3965	26	766	GB10335-RA	71	676	-
GroupUn.3975	6	656	GB10761-RA	610	1209	-
GroupUn.3981	322	957	GB14257-RA	368	1254	-
GroupUn.3987	326	856	GB18823-RA	601	918	-
GroupUn.3995	806	1976	GB10486-RA	470	2210	+
GroupUn.4032	1	865	GB19776-RA	11	589	+
GroupUn.4052	1	764	GB13504-RA	81	614	-
GroupUn.4069	21	1466	GB10639-RA	1173	1502	-
GroupUn.4069	21	1466	GB11138-RA	101	718	+
GroupUn.4113	6	559	GB11185-RA	13	1068	-
GroupUn.4130	221	1159	GB11119-RA	4	888	-
GroupUn.4138	111	864	GB18551-RA	1589	2107	-
GroupUn.4155	126	975	GB16378-RA	196	891	+
GroupUn.4162	106	2953	GB19985-RA	2775	3548	+
GroupUn.4162	3124	3674	GB19985-RA	2775	3548	+
GroupUn.419	10826	11959	GB10512-RA	3513	5129	+
GroupUn.419	10826	11959	GB11606-RA	18246	19819	+
GroupUn.419	10826	11959	GB12652-RA	5421	7153	-
GroupUn.419	10826	11959	GB19385-RA	12147	16185	-
GroupUn.4237	21	664	GB10990-RA	640	1119	+
GroupUn.4240	706	1776	GB14568-RA	606	1196	-
GroupUn.4254	26	462	GB13490-RA	1	831	+
GroupUn.4255	525	960	GB18708-RA	144	1255	-
GroupUn.4272	1006	1555	GB17593-RA	1698	5127	+
GroupUn.4272	3514	4253	GB17593-RA	1698	5127	+
GroupUn.4272	4712	5255	GB17593-RA	1698	5127	+
GroupUn.4284	1701	2281	GB18546-RA	269	1498	+
GroupUn.4284	326	776	GB18546-RA	269	1498	+
GroupUn.4285	1606	2672	GB15222-RA	1032	1772	-
GroupUn.4496	2607	3277	GB11575-RA	2809	3642	+
GroupUn.4497	1022	1478	GB11447-RA	4243	5229	-
GroupUn.4497	3519	4881	GB11447-RA	4243	5229	-
GroupUn.4497	1022	1478	GB11917-RA	2488	3042	+
GroupUn.4497	3519	4881	GB11917-RA	2488	3042	+
GroupUn.4497	1022	1478	GB13650-RA	5751	6281	-
GroupUn.4497	3519	4881	GB13650-RA	5751	6281	-
GroupUn.4497	1022	1478	GB19451-RA	326	2251	+
GroupUn.4497	3519	4881	GB19451-RA	326	2251	+
GroupUn.4520	307	861	GB10248-RA	968	1558	+
GroupUn.4525	426	1071	GB14768-RA	389	1147	-
GroupUn.4564	506	1061	GB15366-RA	62	1063	+
GroupUn.458	19005	19575	GB13821-RA	16860	19414	-
GroupUn.458	19005	19575	GB13821-RB	16860	19414	-
GroupUn.458	19005	19575	GB13821-RC	16860	19414	-
GroupUn.458	19005	19575	GB30518-RA	22126	26264	-
GroupUn.4585	516	965	GB16915-RA	24	791	+
GroupUn.4587	324	1453	GB15868-RA	447	1256	-
GroupUn.4607	116	1077	GB11599-RA	111	1124	-
GroupUn.4640	1	557	GB13439-RA	29	883	-
GroupUn.4740	121	1267	GB10064-RA	14	1279	+
GroupUn.4930	6	762	GB13513-RA	494	868	-
GroupUn.4976	406	978	GB16922-RA	472	1293	-
GroupUn.4999	416	1150	GB19329-RA	421	1230	-
GroupUn.5080	126	1986	GB10527-RA	2330	3403	-
GroupUn.5080	2421	2955	GB10527-RA	2330	3403	-
GroupUn.5080	126	1986	GB30389-RA	792	1370	-
GroupUn.5080	2421	2955	GB30389-RA	792	1370	-
GroupUn.5080	126	1986	GB30390-RA	1373	2263	-
GroupUn.5080	2421	2955	GB30390-RA	1373	2263	-
GroupUn.5197	1	550	GB11841-RA	144	1040	-
GroupUn.5219	26	1561	GB16610-RA	676	1701	+
GroupUn.5220	226	1783	GB14994-RA	828	1772	+
GroupUn.5241	323	1272	GB13691-RA	560	2076	+
GroupUn.5243	1520	1963	GB16374-RA	251	733	+
GroupUn.5243	326	867	GB16374-RA	251	733	+
GroupUn.5263	121	765	GB18298-RA	352	570	+
GroupUn.5284	726	1376	GB15891-RA	837	1313	+
GroupUn.5303	402	1071	GB16851-RA	297	1097	-
GroupUn.5314	206	1758	GB10031-RA	959	1576	-
GroupUn.5330	126	1082	GB13250-RA	201	1082	-
GroupUn.5344	502	1166	GB18134-RA	35	1200	+
GroupUn.5400	909	2257	GB10703-RA	27	2069	+
GroupUn.5404	15	682	GB15926-RA	170	559	+
GroupUn.5404	16	570	GB15926-RA	170	559	+
GroupUn.5418	11	1571	GB14728-RA	243	1427	+
GroupUn.5511	126	690	GB19045-RA	324	782	-
GroupUn.5536	21	864	GB16819-RA	546	1163	-
GroupUn.5569	624	1267	GB16481-RA	40	618	+
GroupUn.5624	126	867	GB17340-RA	178	870	-
GroupUn.5772	126	971	GB10415-RA	216	626	-
GroupUn.5810	1806	2260	GB10962-RA	376	1368	-
GroupUn.5810	1806	2260	GB12625-RA	1569	2279	-
GroupUn.5810	1806	2260	GB16491-RA	11	310	+
GroupUn.5854	500	1256	GB20143-RA	30	905	+
GroupUn.5854	606	1068	GB20143-RA	30	905	+
GroupUn.5856	417	1065	GB12234-RA	1325	1951	-
GroupUn.5886	121	1163	GB18701-RA	688	1380	+
GroupUn.5939	821	1150	GB17307-RA	42	850	+
GroupUn.5999	713	1254	GB14711-RA	24	452	+
GroupUn.6	18124	19367	GB17349-RA	11201	18736	-
GroupUn.6092	221	863	GB17033-RA	423	827	-
GroupUn.6100	6	855	GB17350-RA	17	952	-
GroupUn.6104	921	1464	GB19136-RA	64	1467	+
GroupUn.625	14424	14855	GB13951-RA	2288	5312	-
GroupUn.625	14424	14855	GB15514-RA	7672	8531	+
GroupUn.625	14424	14855	GB16821-RA	11639	15999	+
GroupUn.6295	1011	1464	GB14604-RA	154	1518	-
GroupUn.6488	101	751	GB16938-RA	47	1023	+
GroupUn.6496	326	2160	GB10837-RA	126	674	-
GroupUn.6496	326	2160	GB12333-RA	809	1507	-
GroupUn.6496	326	2160	GB13978-RA	1642	2397	-
GroupUn.6519	226	1252	GB18084-RA	562	882	+
GroupUn.6553	121	1362	GB10682-RA	52	1068	+
GroupUn.6603	625	1158	GB11888-RA	197	697	+
GroupUn.6614	321	958	GB12826-RA	217	1449	-
GroupUn.6621	1	479	GB13131-RA	352	1173	+
GroupUn.6715	5319	6068	GB12454-RA	4747	6981	-
GroupUn.676	11124	11866	GB13481-RA	21427	21738	-
GroupUn.676	11124	11866	GB20150-RA	6129	12398	-
GroupUn.6857	101	662	GB12376-RA	565	1329	-
GroupUn.7	38618	39272	GB13289-RA	19097	29961	-
GroupUn.7069	1616	1959	GB15206-RA	282	1046	-
GroupUn.7069	26	1354	GB15206-RA	282	1046	-
GroupUn.7095	1123	1968	GB13694-RA	808	2316	-
GroupUn.7185	26	672	GB12877-RA	9	770	+
GroupUn.7191	1313	1765	GB13584-RA	2349	3536	+
GroupUn.7191	2114	2664	GB13584-RA	2349	3536	+
GroupUn.7220	226	986	GB10624-RA	210	1169	+
GroupUn.7225	616	1964	GB14119-RA	1282	1965	+
GroupUn.7236	516	1072	GB15250-RA	215	1114	+
GroupUn.7300	11	851	GB14725-RA	69	464	+
GroupUn.7346	619	1057	GB19641-RA	28	570	+
GroupUn.735	14623	15262	GB15081-RA	11541	15104	+
GroupUn.735	14623	15262	GB15360-RA	4191	8570	-
GroupUn.735	14623	15262	GB19364-RA	9314	9886	+
GroupUn.7351	523	959	GB20124-RA	32	1057	-
GroupUn.7366	1101	1555	GB13233-RA	432	857	-
GroupUn.7366	20	460	GB13233-RA	432	857	-
GroupUn.7422	316	2070	GB11109-RA	227	1216	+
GroupUn.7427	326	770	GB16521-RA	267	812	-
GroupUn.7436	616	1072	GB13288-RA	303	1223	+
GroupUn.7463	708	1163	GB19700-RA	547	1407	+
GroupUn.7491	905	1475	GB12258-RA	1109	1780	-
GroupUn.7503	1	679	GB15510-RA	124	982	-
GroupUn.7605	1001	1561	GB17362-RA	48	2248	+
GroupUn.777	1022	1465	GB17578-RA	297	1112	+
GroupUn.777	1526	1973	GB17578-RA	297	1112	+
GroupUn.7787	6	1050	GB10479-RA	224	847	+
GroupUn.7796	226	1265	GB12141-RA	115	1305	-
GroupUn.7837	26	881	GB15251-RA	1	594	+
GroupUn.7918	606	1268	GB18329-RA	140	1275	+
GroupUn.8078	23	1065	GB19339-RA	58	663	-
GroupUn.8108	121	1175	GB15756-RA	175	810	-
GroupUn.8113	1525	3164	GB11653-RA	4606	10132	+
GroupUn.8113	3403	4256	GB11653-RA	4606	10132	+
GroupUn.8113	5323	10061	GB11653-RA	4606	10132	+
GroupUn.8113	1525	3164	GB15022-RA	1466	2026	+
GroupUn.8113	3403	4256	GB15022-RA	1466	2026	+
GroupUn.8113	5323	10061	GB15022-RA	1466	2026	+
GroupUn.8113	1525	3164	GB20073-RA	2050	4163	-
GroupUn.8113	3403	4256	GB20073-RA	2050	4163	-
GroupUn.8113	5323	10061	GB20073-RA	2050	4163	-
GroupUn.829	16	473	GB16004-RA	299	916	-
GroupUn.836	9611	10481	GB18862-RA	5094	7936	+
GroupUn.8399	126	879	GB19153-RA	51	806	+
GroupUn.8453	1709	2367	GB12192-RA	54	2401	+
GroupUn.8453	516	1460	GB12192-RA	54	2401	+
GroupUn.8461	13002	13573	GB11548-RA	13159	18143	+
GroupUn.8461	13002	13573	GB19763-RA	19779	20816	-
GroupUn.8489	410	1769	GB17314-RA	398	1906	+
GroupUn.8493	26	1273	GB19340-RA	180	1686	+
GroupUn.8494	11	486	GB12615-RA	81	1055	-
GroupUn.8577	206	1082	GB17298-RA	480	1370	-
GroupUn.8648	417	1470	GB13177-RA	225	1115	+
GroupUn.8881	6616	7475	GB13878-RA	75	1370	+
GroupUn.9104	26	760	GB10638-RA	133	723	-
GroupUn.984	5602	6965	GB19859-RA	2794	4183	+
GroupUn.984	7502	10476	GB19859-RA	2794	4183	+
Group1.1	621322	621957	NA	NA	NA	NA
Group1.1	638818	639975	NA	NA	NA	NA
Group1.1	648803	649472	NA	NA	NA	NA
Group1.1	705718	706268	NA	NA	NA	NA
Group1.10	14013	14466	NA	NA	NA	NA
Group1.13	47418	48058	NA	NA	NA	NA
Group1.13	59926	60466	NA	NA	NA	NA
Group1.2	441624	442279	NA	NA	NA	NA
Group1.24	312411	313260	NA	NA	NA	NA
Group1.31	1707	2456	NA	NA	NA	NA
Group1.32	60905	61668	NA	NA	NA	NA
Group1.41	6724	7267	NA	NA	NA	NA
Group1.41	78717	79171	NA	NA	NA	NA
Group1.41	207712	208154	NA	NA	NA	NA
Group1.43	45325	46079	NA	NA	NA	NA
Group1.45	109116	110452	NA	NA	NA	NA
Group1.54	56402	57053	NA	NA	NA	NA
Group1.64	187618	188351	NA	NA	NA	NA
Group1.66	233618	234264	NA	NA	NA	NA
Group1.67	46523	47372	NA	NA	NA	NA
Group1.68	95925	96466	NA	NA	NA	NA
Group1.71	533901	534766	NA	NA	NA	NA
Group1.79	324304	325058	NA	NA	NA	NA
Group1.8	484012	484661	NA	NA	NA	NA
Group1.80	5325	6056	NA	NA	NA	NA
Group1.81	143625	144074	NA	NA	NA	NA
Group1.81	266010	266556	NA	NA	NA	NA
Group10.1	194823	195353	NA	NA	NA	NA
Group10.10	22411	22973	NA	NA	NA	NA
Group10.13	38724	39059	NA	NA	NA	NA
Group10.13	60403	60968	NA	NA	NA	NA
Group10.13	95409	95975	NA	NA	NA	NA
Group10.13	121524	122081	NA	NA	NA	NA
Group10.14	23617	24156	NA	NA	NA	NA
Group10.14	78213	79169	NA	NA	NA	NA
Group10.17	145801	146350	NA	NA	NA	NA
Group10.17	172609	173253	NA	NA	NA	NA
Group10.29	59420	59874	NA	NA	NA	NA
Group10.2	108505	109064	NA	NA	NA	NA
Group10.36	237423	237754	NA	NA	NA	NA
Group10.36	974218	976167	NA	NA	NA	NA
Group10.36	1021302	1021958	NA	NA	NA	NA
Group10.36	1022126	1022657	NA	NA	NA	NA
Group10.36	1039703	1040176	NA	NA	NA	NA
Group10.38	177424	178257	NA	NA	NA	NA
Group10.39	346306	346976	NA	NA	NA	NA
Group10.7	59310	59954	NA	NA	NA	NA
Group10.8	45403	46990	NA	NA	NA	NA
Group10.9	33704	34453	NA	NA	NA	NA
Group11.14	261705	262358	NA	NA	NA	NA
Group11.14	309625	310269	NA	NA	NA	NA
Group11.18	107623	108175	NA	NA	NA	NA
Group11.19	84226	84869	NA	NA	NA	NA
Group11.21	127122	127852	NA	NA	NA	NA
Group11.21	368203	369057	NA	NA	NA	NA
Group11.21	399616	400150	NA	NA	NA	NA
Group11.21	439825	440552	NA	NA	NA	NA
Group11.21	528303	529257	NA	NA	NA	NA
Group11.21	560519	561177	NA	NA	NA	NA
Group11.21	672325	672874	NA	NA	NA	NA
Group11.21	697910	699057	NA	NA	NA	NA
Group11.28	92223	92669	NA	NA	NA	NA
Group11.31	170124	170856	NA	NA	NA	NA
Group11.31	259907	261260	NA	NA	NA	NA
Group11.31	669622	670171	NA	NA	NA	NA
Group11.31	1234216	1234853	NA	NA	NA	NA
Group11.31	1525803	1526459	NA	NA	NA	NA
Group11.4	193817	194471	NA	NA	NA	NA
Group11.8	142725	143254	NA	NA	NA	NA
Group11.8	206713	207163	NA	NA	NA	NA
Group11.8	216608	217152	NA	NA	NA	NA
Group12.11	223902	224566	NA	NA	NA	NA
Group12.18	187210	187756	NA	NA	NA	NA
Group12.18	199004	199674	NA	NA	NA	NA
Group12.18	337920	338554	NA	NA	NA	NA
Group12.19	36004	36673	NA	NA	NA	NA
Group12.19	106504	107173	NA	NA	NA	NA
Group12.19	304320	304768	NA	NA	NA	NA
Group12.19	333402	334863	NA	NA	NA	NA
Group12.19	362508	363857	NA	NA	NA	NA
Group12.20	139202	140158	NA	NA	NA	NA
Group12.20	166523	167256	NA	NA	NA	NA
Group12.20	182804	183360	NA	NA	NA	NA
Group12.20	1622304	1622957	NA	NA	NA	NA
Group12.28	285025	285359	NA	NA	NA	NA
Group12.28	491317	491953	NA	NA	NA	NA
Group12.28	551721	552150	NA	NA	NA	NA
Group12.30	69217	69657	NA	NA	NA	NA
Group12.6	237817	238378	NA	NA	NA	NA
Group12.7	105124	105658	NA	NA	NA	NA
Group12.8	36116	36760	NA	NA	NA	NA
Group12.8	43119	46066	NA	NA	NA	NA
Group13.10	1196707	1197154	NA	NA	NA	NA
Group13.11	160105	160555	NA	NA	NA	NA
Group13.13	248702	249368	NA	NA	NA	NA
Group13.13	274202	275662	NA	NA	NA	NA
Group13.13	332826	333951	NA	NA	NA	NA
Group13.13	465419	466460	NA	NA	NA	NA
Group13.13	635426	635958	NA	NA	NA	NA
Group13.13	867525	868058	NA	NA	NA	NA
Group13.14	107024	108960	NA	NA	NA	NA
Group13.14	120125	121453	NA	NA	NA	NA
Group13.15	151220	151953	NA	NA	NA	NA
Group13.15	174706	175060	NA	NA	NA	NA
Group13.15	221319	222162	NA	NA	NA	NA
Group13.16	108423	109256	NA	NA	NA	NA
Group13.18	114821	115475	NA	NA	NA	NA
Group13.4	97503	98456	NA	NA	NA	NA
Group13.4	102205	102759	NA	NA	NA	NA
Group13.4	183212	185458	NA	NA	NA	NA
Group13.4	186625	187759	NA	NA	NA	NA
Group13.4	199225	199759	NA	NA	NA	NA
Group13.4	217209	218050	NA	NA	NA	NA
Group13.5	212616	213250	NA	NA	NA	NA
Group13.9	577925	578571	NA	NA	NA	NA
Group13.9	635617	636281	NA	NA	NA	NA
Group14.10	215823	217176	NA	NA	NA	NA
Group14.10	217726	218578	NA	NA	NA	NA
Group14.21	26426	26967	NA	NA	NA	NA
Group14.23	309618	310757	NA	NA	NA	NA
Group14.23	630211	630860	NA	NA	NA	NA
Group14.23	930820	931269	NA	NA	NA	NA
Group14.24	323725	324254	NA	NA	NA	NA
Group14.24	337120	338759	NA	NA	NA	NA
Group14.24	353420	354254	NA	NA	NA	NA
Group14.24	361923	362781	NA	NA	NA	NA
Group14.24	387205	387757	NA	NA	NA	NA
Group14.24	391906	392866	NA	NA	NA	NA
Group14.24	398726	399257	NA	NA	NA	NA
Group14.24	533607	534156	NA	NA	NA	NA
Group15.14	63202	65163	NA	NA	NA	NA
Group15.20	60223	60650	NA	NA	NA	NA
Group15.24	69620	70669	NA	NA	NA	NA
Group15.24	308926	309868	NA	NA	NA	NA
Group15.29	1242126	1242775	NA	NA	NA	NA
Group15.29	1291317	1291957	NA	NA	NA	NA
Group15.29	1293326	1293875	NA	NA	NA	NA
Group15.29	1294621	1295074	NA	NA	NA	NA
Group15.35	453226	453785	NA	NA	NA	NA
Group15.5	36225	36759	NA	NA	NA	NA
Group16.11	32924	33550	NA	NA	NA	NA
Group16.18	105120	105757	NA	NA	NA	NA
Group16.18	191022	191851	NA	NA	NA	NA
Group16.19	456924	457473	NA	NA	NA	NA
Group16.19	489412	489861	NA	NA	NA	NA
Group16.7	417909	418457	NA	NA	NA	NA
Group16.9	1292124	1292458	NA	NA	NA	NA
Group16.9	1524001	1524670	NA	NA	NA	NA
Group2.15	82709	83271	NA	NA	NA	NA
Group2.23	366705	367256	NA	NA	NA	NA
Group2.24	128709	129368	NA	NA	NA	NA
Group2.25	138614	139168	NA	NA	NA	NA
Group2.25	139505	139954	NA	NA	NA	NA
Group2.25	157326	158071	NA	NA	NA	NA
Group2.26	25617	26272	NA	NA	NA	NA
Group2.26	101818	102350	NA	NA	NA	NA
Group2.26	159525	160156	NA	NA	NA	NA
Group2.26	206614	207264	NA	NA	NA	NA
Group2.27	1001	1465	NA	NA	NA	NA
Group2.29	68710	69459	NA	NA	NA	NA
Group2.29	84423	84852	NA	NA	NA	NA
Group2.30	184811	186054	NA	NA	NA	NA
Group2.30	212311	213453	NA	NA	NA	NA
Group2.30	287326	288150	NA	NA	NA	NA
Group2.30	635420	636368	NA	NA	NA	NA
Group2.30	642717	643266	NA	NA	NA	NA
Group2.33	510619	511157	NA	NA	NA	NA
Group2.33	724423	725375	NA	NA	NA	NA
Group2.34	204122	205051	NA	NA	NA	NA
Group2.35	68722	69151	NA	NA	NA	NA
Group2.35	92925	93965	NA	NA	NA	NA
Group2.38	884723	885563	NA	NA	NA	NA
Group2.38	982712	983151	NA	NA	NA	NA
Group2.38	983702	984161	NA	NA	NA	NA
Group2.5	124210	124862	NA	NA	NA	NA
Group2.6	146905	147552	NA	NA	NA	NA
Group2.9	226803	227353	NA	NA	NA	NA
Group3.11	38818	39162	NA	NA	NA	NA
Group3.12	43317	44254	NA	NA	NA	NA
Group3.17	86624	87160	NA	NA	NA	NA
Group3.20	630310	630864	NA	NA	NA	NA
Group3.24	143224	143877	NA	NA	NA	NA
Group3.27	323024	323470	NA	NA	NA	NA
Group3.30	62222	63068	NA	NA	NA	NA
Group3.31	222819	223456	NA	NA	NA	NA
Group3.36	55422	55951	NA	NA	NA	NA
Group3.36	74918	75354	NA	NA	NA	NA
Group3.36	77807	79463	NA	NA	NA	NA
Group3.36	135508	136052	NA	NA	NA	NA
Group3.36	483809	484354	NA	NA	NA	NA
Group3.36	556618	556762	NA	NA	NA	NA
Group3.36	655006	655580	NA	NA	NA	NA
Group3.4	4521	5160	NA	NA	NA	NA
Group3.5	30523	30953	NA	NA	NA	NA
Group4.15	133112	133466	NA	NA	NA	NA
Group4.15	209118	209659	NA	NA	NA	NA
Group4.15	734602	735456	NA	NA	NA	NA
Group4.20	123010	123759	NA	NA	NA	NA
Group4.22	66322	66861	NA	NA	NA	NA
Group4.22	498816	499274	NA	NA	NA	NA
Group4.23	179404	180271	NA	NA	NA	NA
Group4.27	330725	331459	NA	NA	NA	NA
Group4.2	116510	117180	NA	NA	NA	NA
Group4.2	127910	128381	NA	NA	NA	NA
Group4.4	105613	106171	NA	NA	NA	NA
Group4.4	122526	123150	NA	NA	NA	NA
Group4.7	471414	471953	NA	NA	NA	NA
Group5.12	235623	236573	NA	NA	NA	NA
Group5.16	93805	94359	NA	NA	NA	NA
Group5.18	262215	263054	NA	NA	NA	NA
Group5.20	19322	19757	NA	NA	NA	NA
Group5.21	119912	120551	NA	NA	NA	NA
Group5.22	367023	367660	NA	NA	NA	NA
Group5.22	658111	658570	NA	NA	NA	NA
Group5.29	17303	18062	NA	NA	NA	NA
Group5.2	144025	144758	NA	NA	NA	NA
Group5.33	395323	395752	NA	NA	NA	NA
Group5.3	86501	88458	NA	NA	NA	NA
Group5.3	109410	109953	NA	NA	NA	NA
Group5.4	690022	690651	NA	NA	NA	NA
Group5.7	105507	106682	NA	NA	NA	NA
Group5.7	164206	164864	NA	NA	NA	NA
Group6.13	126525	127069	NA	NA	NA	NA
Group6.21	328925	329452	NA	NA	NA	NA
Group6.21	407716	408378	NA	NA	NA	NA
Group6.26	514910	515569	NA	NA	NA	NA
Group6.28	431218	432158	NA	NA	NA	NA
Group6.28	476124	476574	NA	NA	NA	NA
Group6.28	489918	490757	NA	NA	NA	NA
Group6.30	243922	244361	NA	NA	NA	NA
Group6.30	312520	313161	NA	NA	NA	NA
Group6.30	349222	349955	NA	NA	NA	NA
Group6.32	64425	64763	NA	NA	NA	NA
Group6.32	1378420	1378971	NA	NA	NA	NA
Group6.34	152919	153480	NA	NA	NA	NA
Group6.38	22406	22770	NA	NA	NA	NA
Group6.38	153502	154155	NA	NA	NA	NA
Group6.38	257202	259875	NA	NA	NA	NA
Group6.40	116926	117350	NA	NA	NA	NA
Group6.41	26812	27364	NA	NA	NA	NA
Group6.45	115202	116256	NA	NA	NA	NA
Group6.45	117120	117656	NA	NA	NA	NA
Group6.7	50825	51469	NA	NA	NA	NA
Group6.8	58725	59169	NA	NA	NA	NA
Group6.9	48224	48958	NA	NA	NA	NA
Group7.13	38013	38872	NA	NA	NA	NA
Group7.24	15820	16363	NA	NA	NA	NA
Group7.29	146118	149967	NA	NA	NA	NA
Group7.33	177303	177764	NA	NA	NA	NA
Group7.33	232002	232559	NA	NA	NA	NA
Group7.33	352023	353384	NA	NA	NA	NA
Group7.33	390719	391373	NA	NA	NA	NA
Group7.35	91315	91774	NA	NA	NA	NA
Group7.35	92415	92864	NA	NA	NA	NA
Group7.35	153326	153851	NA	NA	NA	NA
Group7.35	273617	274166	NA	NA	NA	NA
Group7.35	612424	613569	NA	NA	NA	NA
Group7.35	739226	740275	NA	NA	NA	NA
Group7.35	938826	939570	NA	NA	NA	NA
Group7.38	639101	640157	NA	NA	NA	NA
Group7.39	137323	137767	NA	NA	NA	NA
Group7.40	9823	10252	NA	NA	NA	NA
Group7.46	271924	272353	NA	NA	NA	NA
Group7.5	91122	91653	NA	NA	NA	NA
Group7.6	282023	282767	NA	NA	NA	NA
Group7.6	284101	285150	NA	NA	NA	NA
Group7.6	291109	291561	NA	NA	NA	NA
Group7.6	297513	298384	NA	NA	NA	NA
Group7.6	300922	301671	NA	NA	NA	NA
Group7.6	323821	324475	NA	NA	NA	NA
Group7.6	345504	346271	NA	NA	NA	NA
Group7.6	387626	388056	NA	NA	NA	NA
Group8.16	41604	42068	NA	NA	NA	NA
Group8.16	52507	53056	NA	NA	NA	NA
Group8.16	373415	373862	NA	NA	NA	NA
Group8.16	450605	451279	NA	NA	NA	NA
Group8.20	418104	418653	NA	NA	NA	NA
Group8.20	815222	815675	NA	NA	NA	NA
Group8.28	389208	389757	NA	NA	NA	NA
Group8.35	151116	151557	NA	NA	NA	NA
Group8.40	117804	118364	NA	NA	NA	NA
Group8.42	658804	660357	NA	NA	NA	NA
Group8.46	54419	54853	NA	NA	NA	NA
Group8.7	83009	83472	NA	NA	NA	NA
Group9.17	223620	224276	NA	NA	NA	NA
Group9.23	405803	406381	NA	NA	NA	NA
Group9.23	796007	796651	NA	NA	NA	NA
Group9.24	666526	667450	NA	NA	NA	NA
Group9.24	690623	691370	NA	NA	NA	NA
Group9.25	410123	410763	NA	NA	NA	NA
Group9.26	55810	56762	NA	NA	NA	NA
Group9.26	222223	222677	NA	NA	NA	NA
Group9.7	69525	70051	NA	NA	NA	NA
Group9.7	155609	156553	NA	NA	NA	NA
Group9.8	92902	93351	NA	NA	NA	NA
GroupUn.1173	17421	18177	NA	NA	NA	NA
GroupUn.1187	1511	2470	NA	NA	NA	NA
GroupUn.1340	1	1079	NA	NA	NA	NA
GroupUn.134	8122	8564	NA	NA	NA	NA
GroupUn.1367	2001	2767	NA	NA	NA	NA
GroupUn.1454	4602	4951	NA	NA	NA	NA
GroupUn.1630	126	881	NA	NA	NA	NA
GroupUn.1636	221	951	NA	NA	NA	NA
GroupUn.1647	326	871	NA	NA	NA	NA
GroupUn.1718	1	670	NA	NA	NA	NA
GroupUn.1807	322	971	NA	NA	NA	NA
GroupUn.185	1324	1853	NA	NA	NA	NA
GroupUn.2050	501	1066	NA	NA	NA	NA
GroupUn.2081	506	959	NA	NA	NA	NA
GroupUn.2109	421	863	NA	NA	NA	NA
GroupUn.212	1805	2356	NA	NA	NA	NA
GroupUn.2161	16	950	NA	NA	NA	NA
GroupUn.2163	1	1365	NA	NA	NA	NA
GroupUn.2214	116	875	NA	NA	NA	NA
GroupUn.2353	221	782	NA	NA	NA	NA
GroupUn.2389	1222	1751	NA	NA	NA	NA
GroupUn.238	17405	17965	NA	NA	NA	NA
GroupUn.2529	6	458	NA	NA	NA	NA
GroupUn.2547	111	962	NA	NA	NA	NA
GroupUn.2551	1	1155	NA	NA	NA	NA
GroupUn.2577	501	1074	NA	NA	NA	NA
GroupUn.2612	216	1575	NA	NA	NA	NA
GroupUn.2622	16	350	NA	NA	NA	NA
GroupUn.2690	603	1652	NA	NA	NA	NA
GroupUn.2693	26	750	NA	NA	NA	NA
GroupUn.269	24105	24560	NA	NA	NA	NA
GroupUn.2743	217	968	NA	NA	NA	NA
GroupUn.2812	124	1257	NA	NA	NA	NA
GroupUn.2855	101	861	NA	NA	NA	NA
GroupUn.2891	201	678	NA	NA	NA	NA
GroupUn.2	47522	47963	NA	NA	NA	NA
GroupUn.3013	10623	11257	NA	NA	NA	NA
GroupUn.3042	623	1279	NA	NA	NA	NA
GroupUn.3097	11	480	NA	NA	NA	NA
GroupUn.3098	1225	2166	NA	NA	NA	NA
GroupUn.3130	26	761	NA	NA	NA	NA
GroupUn.3148	16	660	NA	NA	NA	NA
GroupUn.3164	6	483	NA	NA	NA	NA
GroupUn.31	320	959	NA	NA	NA	NA
GroupUn.3230	1	1150	NA	NA	NA	NA
GroupUn.3231	1	773	NA	NA	NA	NA
GroupUn.3252	26	1050	NA	NA	NA	NA
GroupUn.3307	926	1675	NA	NA	NA	NA
GroupUn.3468	625	1174	NA	NA	NA	NA
GroupUn.3531	616	1060	NA	NA	NA	NA
GroupUn.3587	722	1464	NA	NA	NA	NA
GroupUn.3600	201	965	NA	NA	NA	NA
GroupUn.3608	11	578	NA	NA	NA	NA
GroupUn.3617	101	963	NA	NA	NA	NA
GroupUn.3624	401	1158	NA	NA	NA	NA
GroupUn.3723	26	558	NA	NA	NA	NA
GroupUn.3734	11	363	NA	NA	NA	NA
GroupUn.3767	1	575	NA	NA	NA	NA
GroupUn.3836	201	1261	NA	NA	NA	NA
GroupUn.3908	226	962	NA	NA	NA	NA
GroupUn.3929	226	1179	NA	NA	NA	NA
GroupUn.3931	206	1557	NA	NA	NA	NA
GroupUn.3951	526	1080	NA	NA	NA	NA
GroupUn.3976	126	963	NA	NA	NA	NA
GroupUn.3985	713	1355	NA	NA	NA	NA
GroupUn.4004	104	767	NA	NA	NA	NA
GroupUn.4005	426	1082	NA	NA	NA	NA
GroupUn.4024	421	1064	NA	NA	NA	NA
GroupUn.4058	21	559	NA	NA	NA	NA
GroupUn.4095	201	965	NA	NA	NA	NA
GroupUn.4103	524	968	NA	NA	NA	NA
GroupUn.4136	11	669	NA	NA	NA	NA
GroupUn.4137	802	1351	NA	NA	NA	NA
GroupUn.4139	121	955	NA	NA	NA	NA
GroupUn.4151	206	1178	NA	NA	NA	NA
GroupUn.4157	711	1279	NA	NA	NA	NA
GroupUn.4170	126	758	NA	NA	NA	NA
GroupUn.4191	915	1482	NA	NA	NA	NA
GroupUn.4193	326	1080	NA	NA	NA	NA
GroupUn.4204	611	1759	NA	NA	NA	NA
GroupUn.4222	1	463	NA	NA	NA	NA
GroupUn.4238	311	858	NA	NA	NA	NA
GroupUn.4259	111	1157	NA	NA	NA	NA
GroupUn.4411	21	1284	NA	NA	NA	NA
GroupUn.4417	116	675	NA	NA	NA	NA
GroupUn.4427	301	880	NA	NA	NA	NA
GroupUn.4428	26	975	NA	NA	NA	NA
GroupUn.4442	16	964	NA	NA	NA	NA
GroupUn.4445	126	785	NA	NA	NA	NA
GroupUn.4461	26	1182	NA	NA	NA	NA
GroupUn.4473	116	1474	NA	NA	NA	NA
GroupUn.4477	16	960	NA	NA	NA	NA
GroupUn.4498	26	1663	NA	NA	NA	NA
GroupUn.4499	126	865	NA	NA	NA	NA
GroupUn.4543	316	951	NA	NA	NA	NA
GroupUn.4544	426	1783	NA	NA	NA	NA
GroupUn.4563	301	1768	NA	NA	NA	NA
GroupUn.4593	119	1282	NA	NA	NA	NA
GroupUn.4610	701	1167	NA	NA	NA	NA
GroupUn.4620	3206	3860	NA	NA	NA	NA
GroupUn.4664	26	1369	NA	NA	NA	NA
GroupUn.4671	709	1166	NA	NA	NA	NA
GroupUn.4709	1	457	NA	NA	NA	NA
GroupUn.4710	11	574	NA	NA	NA	NA
GroupUn.4713	1	1182	NA	NA	NA	NA
GroupUn.4721	216	1071	NA	NA	NA	NA
GroupUn.4737	1	1079	NA	NA	NA	NA
GroupUn.4744	16	478	NA	NA	NA	NA
GroupUn.4745	26	977	NA	NA	NA	NA
GroupUn.4748	9602	9980	NA	NA	NA	NA
GroupUn.4769	301	1155	NA	NA	NA	NA
GroupUn.4775	516	1274	NA	NA	NA	NA
GroupUn.4796	314	1361	NA	NA	NA	NA
GroupUn.4841	226	871	NA	NA	NA	NA
GroupUn.4920	311	1060	NA	NA	NA	NA
GroupUn.4938	902	1559	NA	NA	NA	NA
GroupUn.4955	222	659	NA	NA	NA	NA
GroupUn.500	19326	19763	NA	NA	NA	NA
GroupUn.5017	416	975	NA	NA	NA	NA
GroupUn.5118	311	1173	NA	NA	NA	NA
GroupUn.5149	501	973	NA	NA	NA	NA
GroupUn.5189	1204	1985	NA	NA	NA	NA
GroupUn.5190	21	658	NA	NA	NA	NA
GroupUn.5225	26	960	NA	NA	NA	NA
GroupUn.5236	721	1381	NA	NA	NA	NA
GroupUn.5249	121	653	NA	NA	NA	NA
GroupUn.5261	21	780	NA	NA	NA	NA
GroupUn.5282	6	1261	NA	NA	NA	NA
GroupUn.5288	626	1065	NA	NA	NA	NA
GroupUn.5313	26	1563	NA	NA	NA	NA
GroupUn.5332	26	1177	NA	NA	NA	NA
GroupUn.5335	1	480	NA	NA	NA	NA
GroupUn.5366	426	1054	NA	NA	NA	NA
GroupUn.5371	606	1390	NA	NA	NA	NA
GroupUn.5371	1822	3054	NA	NA	NA	NA
GroupUn.5376	11	968	NA	NA	NA	NA
GroupUn.5452	121	1250	NA	NA	NA	NA
GroupUn.5470	1523	1857	NA	NA	NA	NA
GroupUn.5505	326	783	NA	NA	NA	NA
GroupUn.5517	21	1070	NA	NA	NA	NA
GroupUn.5535	301	1258	NA	NA	NA	NA
GroupUn.5545	212	1168	NA	NA	NA	NA
GroupUn.5546	16	1273	NA	NA	NA	NA
GroupUn.5605	625	1062	NA	NA	NA	NA
GroupUn.5644	11	862	NA	NA	NA	NA
GroupUn.5782	601	1279	NA	NA	NA	NA
GroupUn.5783	26	1782	NA	NA	NA	NA
GroupUn.5792	6	1668	NA	NA	NA	NA
GroupUn.5793	811	1360	NA	NA	NA	NA
GroupUn.5796	307	1155	NA	NA	NA	NA
GroupUn.5808	1	760	NA	NA	NA	NA
GroupUn.5809	612	1069	NA	NA	NA	NA
GroupUn.5827	1226	1758	NA	NA	NA	NA
GroupUn.5832	417	1879	NA	NA	NA	NA
GroupUn.5846	26	876	NA	NA	NA	NA
GroupUn.5852	101	875	NA	NA	NA	NA
GroupUn.5869	926	1252	NA	NA	NA	NA
GroupUn.5891	26	867	NA	NA	NA	NA
GroupUn.5894	1	787	NA	NA	NA	NA
GroupUn.5915	505	1064	NA	NA	NA	NA
GroupUn.5916	11	880	NA	NA	NA	NA
GroupUn.5934	126	858	NA	NA	NA	NA
GroupUn.5944	1424	2064	NA	NA	NA	NA
GroupUn.5945	226	858	NA	NA	NA	NA
GroupUn.5946	301	1351	NA	NA	NA	NA
GroupUn.5978	1	868	NA	NA	NA	NA
GroupUn.6002	406	1450	NA	NA	NA	NA
GroupUn.6004	106	1670	NA	NA	NA	NA
GroupUn.6009	326	950	NA	NA	NA	NA
GroupUn.6010	21	978	NA	NA	NA	NA
GroupUn.6025	226	1262	NA	NA	NA	NA
GroupUn.6027	101	1673	NA	NA	NA	NA
GroupUn.6043	26	653	NA	NA	NA	NA
GroupUn.6067	11	670	NA	NA	NA	NA
GroupUn.6069	1	668	NA	NA	NA	NA
GroupUn.6072	1	1065	NA	NA	NA	NA
GroupUn.6089	11	462	NA	NA	NA	NA
GroupUn.6091	6	662	NA	NA	NA	NA
GroupUn.6467	201	1465	NA	NA	NA	NA
GroupUn.6489	121	865	NA	NA	NA	NA
GroupUn.6497	221	1474	NA	NA	NA	NA
GroupUn.6498	26	1087	NA	NA	NA	NA
GroupUn.6529	6	1065	NA	NA	NA	NA
GroupUn.6538	221	1159	NA	NA	NA	NA
GroupUn.6562	221	772	NA	NA	NA	NA
GroupUn.6569	323	971	NA	NA	NA	NA
GroupUn.6599	26	566	NA	NA	NA	NA
GroupUn.6600	1	668	NA	NA	NA	NA
GroupUn.6642	321	1477	NA	NA	NA	NA
GroupUn.6653	1002	1652	NA	NA	NA	NA
GroupUn.6666	21	567	NA	NA	NA	NA
GroupUn.6672	221	1061	NA	NA	NA	NA
GroupUn.6675	106	773	NA	NA	NA	NA
GroupUn.6691	401	1084	NA	NA	NA	NA
GroupUn.6717	515	1061	NA	NA	NA	NA
GroupUn.7192	6	1066	NA	NA	NA	NA
GroupUn.7194	506	1476	NA	NA	NA	NA
GroupUn.7208	303	959	NA	NA	NA	NA
GroupUn.7224	602	1267	NA	NA	NA	NA
GroupUn.7286	420	972	NA	NA	NA	NA
GroupUn.7297	26	551	NA	NA	NA	NA
GroupUn.7319	26	574	NA	NA	NA	NA
GroupUn.7319	611	1164	NA	NA	NA	NA
GroupUn.7340	26	575	NA	NA	NA	NA
GroupUn.7452	26	860	NA	NA	NA	NA
GroupUn.7479	214	1063	NA	NA	NA	NA
GroupUn.7536	1	362	NA	NA	NA	NA
GroupUn.7639	304	976	NA	NA	NA	NA
GroupUn.7681	11	1064	NA	NA	NA	NA
GroupUn.7757	822	1179	NA	NA	NA	NA
GroupUn.7795	501	1375	NA	NA	NA	NA
GroupUn.7807	526	1561	NA	NA	NA	NA
GroupUn.7838	16	1250	NA	NA	NA	NA
GroupUn.7847	701	1057	NA	NA	NA	NA
GroupUn.7862	520	1161	NA	NA	NA	NA
GroupUn.7865	322	662	NA	NA	NA	NA
GroupUn.7868	726	1165	NA	NA	NA	NA
GroupUn.7874	919	1264	NA	NA	NA	NA
GroupUn.7896	501	1083	NA	NA	NA	NA
GroupUn.7919	405	1260	NA	NA	NA	NA
GroupUn.7931	221	750	NA	NA	NA	NA
GroupUn.7949	201	861	NA	NA	NA	NA
GroupUn.7977	211	867	NA	NA	NA	NA
GroupUn.8004	26	370	NA	NA	NA	NA
GroupUn.8038	217	861	NA	NA	NA	NA
GroupUn.8080	16	657	NA	NA	NA	NA
GroupUn.8110	523	1274	NA	NA	NA	NA
GroupUn.8168	11	1075	NA	NA	NA	NA
GroupUn.8197	2110	2873	NA	NA	NA	NA
GroupUn.8201	21	2360	NA	NA	NA	NA
GroupUn.8260	1006	1757	NA	NA	NA	NA
GroupUn.8305	605	966	NA	NA	NA	NA
GroupUn.8497	421	968	NA	NA	NA	NA
GroupUn.854	24406	24872	NA	NA	NA	NA
GroupUn.8555	1	567	NA	NA	NA	NA
GroupUn.8580	26	956	NA	NA	NA	NA
GroupUn.8631	421	1060	NA	NA	NA	NA
GroupUn.8635	26	667	NA	NA	NA	NA
GroupUn.8727	1222	1859	NA	NA	NA	NA
GroupUn.8728	611	1077	NA	NA	NA	NA
GroupUn.8753	124	1161	NA	NA	NA	NA
GroupUn.877	8502	8958	NA	NA	NA	NA
GroupUn.9107	409	1074	NA	NA	NA	NA
GroupUn.9168	6	551	NA	NA	NA	NA
GroupUn.9192	21	683	NA	NA	NA	NA
GroupUn.9240	326	952	NA	NA	NA	NA
GroupUn.927	101	854	NA	NA	NA	NA
GroupUn.94	901	1467	NA	NA	NA	NA
GroupUn.95	50622	51169	NA	NA	NA	NA
Group10.14	23101	24371	NA	NA	NA	NA
Group10.39	384720	385250	NA	NA	NA	NA
Group10.42	55903	56476	NA	NA	NA	NA
Group11.4	169608	170576	NA	NA	NA	NA
Group14.24	415724	416374	NA	NA	NA	NA
Group15.29	1302806	1303361	NA	NA	NA	NA
Group16.9	871203	871763	NA	NA	NA	NA
Group2.23	119122	120175	NA	NA	NA	NA
Group2.33	523405	523850	NA	NA	NA	NA
Group2.37	210623	211058	NA	NA	NA	NA
Group2.6	160123	160562	NA	NA	NA	NA
Group3.36	47110	47852	NA	NA	NA	NA
Group3.36	643402	644961	NA	NA	NA	NA
Group3.36	668914	669662	NA	NA	NA	NA
Group3.4	20608	21075	NA	NA	NA	NA
Group4.7	951622	952160	NA	NA	NA	NA
Group5.12	196400	196877	NA	NA	NA	NA
Group5.12	1366008	1366553	NA	NA	NA	NA
Group5.21	147821	148251	NA	NA	NA	NA
Group5.21	156300	156854	NA	NA	NA	NA
Group5.8	182516	182953	NA	NA	NA	NA
Group6.32	939818	940254	NA	NA	NA	NA
Group7.14	31817	32575	NA	NA	NA	NA
Group8.16	81802	82369	NA	NA	NA	NA
Group8.39	28420	29154	NA	NA	NA	NA
Group8.42	341707	342585	NA	NA	NA	NA
Group9.17	237509	238059	NA	NA	NA	NA
GroupUn.1647	120	1055	NA	NA	NA	NA
GroupUn.2046	5	467	NA	NA	NA	NA
GroupUn.2155	320	760	NA	NA	NA	NA
GroupUn.2720	215	655	NA	NA	NA	NA
GroupUn.3004	33325	33770	NA	NA	NA	NA
GroupUn.3085	0	475	NA	NA	NA	NA
GroupUn.3608	10	1062	NA	NA	NA	NA
GroupUn.4109	25	455	NA	NA	NA	NA
GroupUn.4707	100	557	NA	NA	NA	NA
GroupUn.5190	20	759	NA	NA	NA	NA
GroupUn.5218	0	474	NA	NA	NA	NA
GroupUn.5558	20	455	NA	NA	NA	NA
GroupUn.6021	221	672	NA	NA	NA	NA
GroupUn.6696	0	778	NA	NA	NA	NA
GroupUn.7809	500	956	NA	NA	NA	NA
GroupUn.7931	0	950	NA	NA	NA	NA
GroupUn.8080	710	1158	NA	NA	NA	NA
