# Supplementary material for: The Transcription Factor Ultraspiracle Influences Honey Bee Social Behavior and Behavior-Related Gene Expression
Source: PLoS Genet. 2012 Mar 29;8(3):e1002596. doi: 10.1371/journal.pgen.1002596 (PMC3315457; doi:10.1371/journal.pgen.1002596)
Supplement: Table S5 — Clusters of genes co-expressed in both brain and fat, and their enrichment for maturation and hormonally-related genes. Clustering was performed using a combination of Weighted Gene Co-expression Network Analysis and CoherentCluster, as described in Methods. For each cluster, we provide the identifiers for the associated microarray features; and statistical enrichments for genes that were differentially expressed in response to maturation, associated with USP (ChIP-chip or usp RNAi transcriptomics), and responsive to juvenile hormone analog treatment, to vitellogenin RNAi, or rich vs. poor diet. Note: to compare RNA-seq data with microarray data, we used the microarray features corresponding to each differentially expressed transcript. (XLS) [file pgen.1002596.s016.xls]

## Sheet: Table S1
Table S5. Coherent Cluster derived from fat data				* CoherentCluster ID named by "WGCNA moduleID-TightClusterID-coherent moduleID"
CoherentCluster ID	Size	Genes	Maturation-related	JHA, Vg or USP related
1-1-1	28	AM07207;AM03055;AM01577;AM00630;AM02348;AM12891;AM00888R;AM00186;AM00379R;AM00971R;AM00594R;AM03889;AM00930R;AM12599;AM00953R;AM00979;AM00448;AM01520;AM00572R;AM04822;AM00820R;AM09297;AM00902;AM02706;AM01261;AM08985;AM02629;AM03123;	FALSE	FALSE
1-1-2	12	AM01062;AM09368;AM07167;AM07048;AM01941;AM01975;AM07056;AM00713;AM12486;AM01646;AM02038;AM01532;	FALSE	FALSE
1-1-3	9	AM12785;AM09957;AM10552;AM04526;AM00870R;AM05622;AM02225;AM00653R;AM12882R;	FALSE	FALSE
1-1-4	7	AM00938R;AM01508;AM04860;AM10844;AM11868;AM12858R;AM06561;	FALSE	FALSE
1-1-5	7	AM01953;AM10107;AM03560;AM06041;AM00304;AM02407;AM04271;	FALSE	FALSE
1-1-6	4	AM01936;AM10369;AM01457;AM08887;	FALSE	FALSE
1-1-7	3	AM12389;AM01890;AM00393;	FALSE	FALSE
1-2-1	19	AM04509;AM02794;AM00499R;AM00197;AM01347;AM08237;AM00854R;AM06105;AM05781;AM07411;AM00046R;AM00575;AM03049;AM12866R;AM09658;AM12876R;AM01108;AM00240;AM00705R;	FALSE	FALSE
1-2-2	10	AM11569;AM06676;AM10143;AM05233;AM11472;AM07523;AM02064;AM02949;AM09075;AM09469;	FALSE	FALSE
1-2-3	8	AM01173;AM09054;AM00764;AM06425;AM00089;AM12814;AM00855R;AM02589;	FALSE	FALSE
1-2-4	4	AM01864;AM01996;AM02392;AM09232;	FALSE	FALSE
1-2-5	4	AM06896;AM10111;AM05450;AM08972;	FALSE	FALSE
1-2-6	3	AM03108;AM05375;AM05565;	FALSE	FALSE
1-3-1	16	AM00488;AM01260;AM05192;AM10493;AM10672;AM00957R;AM00212;AM12239;AM00018;AM00551R;AM01781;AM00399;AM04928;AM08859;AM10669;AM11834;	FALSE	FALSE
1-3-2	7	AM00393R;AM01336;AM01279;AM00736;AM02110;AM02144;AM03536;	FALSE	FALSE
1-4-1	43	AM03622;AM03786;AM12269;AM03747;AM03698;AM07921;AM02107;AM10690;AM09533;AM03507;AM04858;AM05289;AM10537;AM01018;AM07810;AM09588;AM11436;AM06401;AM00384;AM00391;AM04079;AM02543;AM04710;AM05319;AM07767;AM01899;AM02230;AM04367;AM04843;AM09883;AM10819;AM11755;AM12483;AM09463;AM12752;AM00056;AM01077;AM01950;AM03815;AM03231;AM06882;AM00444;AM03663;	TRUE	TURE
1-4-2	20	AM06385;AM02096;AM08143;AM10079;AM10280;AM11397;AM10182;AM02782;AM07561;AM09994;AM11673;AM11989;AM00956;AM12863;AM02426;AM07333;AM03654;AM05557;AM10834;AM12850;	TRUE	TURE
1-4-3	13	AM12234;AM00983;AM03259;AM07516;AM07383;AM10649;AM03752;AM11407;AM03709;AM01613;AM05588;AM08695;AM09904;	TRUE	TURE
1-4-4	12	AM02944;AM11115;AM06924;AM06454;AM02877;AM03430;AM09272;AM05230;AM11646;AM02800;AM10145;AM12272;	FALSE	FALSE
1-4-5	10	AM06154;AM05096;AM08856;AM04493;AM06946;AM04309;AM01887;AM00489;AM09211;AM10154;	FALSE	FALSE
1-4-6	6	AM06315;AM00409;AM10546;AM00518;AM04810;AM03141;	TRUE	TURE
1-4-7	5	AM06814;AM00395R;AM06317;AM03973;AM12143;	FALSE	FALSE
1-4-8	5	AM02506;AM01454;AM02080;AM05917;AM07776;	FALSE	FALSE
1-4-9	3	AM05148;AM06702;AM10785;	FALSE	FALSE
1-4-10	3	AM09183;AM01668;AM11639;	FALSE	FALSE
1-5-1	10	AM02029;AM04755;AM10090;AM03504;AM09405;AM12318;AM02732;AM00703;AM12406;AM02092;	FALSE	FALSE
1-5-2	4	AM06796;AM02185;AM03602;AM03831;	FALSE	FALSE
1-5-3	3	AM00616R;AM02090;AM12847;	FALSE	FALSE
1-5-4	3	AM09836;AM03684;AM03890;	FALSE	FALSE
1-6-1	12	AM04991;AM06175;AM06722;AM01993;AM02165;AM05117;AM03554;AM06051;AM04280;AM07471;AM03228;AM09689;	FALSE	FALSE
1-6-2	3	AM00869;AM00689R;AM09873;	FALSE	FALSE
1-6-3	3	AM01507;AM09462;AM08957;	FALSE	FALSE
1-7-1	14	AM00904;AM01074;AM11337;AM00961;AM01540;AM02056;AM04165;AM01703;AM01322;AM00549R;AM00967R;AM04527;AM06291;AM09988;	FALSE	FALSE
1-7-2	5	AM03267;AM06065;AM03971;AM07101;AM12620;	FALSE	FALSE
1-8-1	5	AM03393;AM00200;AM00846;AM12892R;AM00816R;	FALSE	FALSE
1-9-1	16	AM08649;AM03658;AM08865;AM04194;AM07794;AM06358;AM09552;AM11403;AM04093;AM05164;AM11856;AM05247;AM02595;AM05515;AM06952;AM08121;	FALSE	FALSE
1-9-2	5	AM10773;AM06064;AM00058R;AM05118;AM02622;	FALSE	FALSE
1-9-3	3	AM04492;AM09475;AM00678;	FALSE	FALSE
1-10-1	5	AM08129;AM08687;AM08617;AM09446;AM07946;	FALSE	FALSE
1-11-1	11	AM00473;AM00685R;AM10413;AM00243;AM00699R;AM01478;AM11823;AM02130;AM02876;AM05937;AM05491;	FALSE	FALSE
1-12-1	7	AM01503;AM00733R;AM00804R;AM06487R;AM09979;AM12716;AM04939;	FALSE	FALSE
1-13-1	7	AM01061;AM00183;AM00707R;AM00959R;AM02209;AM05075;AM00862;	FALSE	FALSE
1-14-1	4	AM06888;AM00528;AM03178;AM04340;	FALSE	FALSE
1-15-1	8	AM00219;AM00227;AM00250;AM00467;AM00574R;AM01015;AM03184;AM06929;	FALSE	FALSE
1-16-1	5	AM06674;AM10218;AM05120;AM02884;AM05436;	FALSE	FALSE
1-17-1	5	AM04341;AM07165;AM01363;AM00491R;AM10122;	FALSE	FALSE
1-18-1	6	AM06316;AM12808;AM09998;AM04110;AM04594;AM08300;	FALSE	FALSE
1-18-2	3	AM12803;AM08090;AM00966;	FALSE	FALSE
1-18-3	3	AM00852;AM01007;AM06288;	FALSE	FALSE
1-19-1	3	AM00288;AM00522;AM08365;	FALSE	FALSE
1-19-2	3	AM02785;AM05807;AM07019;	FALSE	FALSE
1-20-1	8	AM01452;AM08147;AM12749;AM00199;AM00280;AM00415R;AM00922R;AM03960;	FALSE	FALSE
1-21-1	3	AM01499;AM04067;AM03416;	FALSE	FALSE
1-21-2	3	AM07381;AM10484;AM11227;	FALSE	FALSE
1-22-1	6	AM00094;AM12418;AM05685;AM07667;AM04389;AM06490R;	FALSE	FALSE
1-23-1	3	AM01574;AM06279;AM01429;	FALSE	FALSE
1-24-1	5	AM00486;AM07363;AM08175;AM09604;AM02040;	FALSE	FALSE
1-25-1	4	AM00187;AM00493R;AM00204;AM00838R;	FALSE	FALSE
1-26-1	4	AM01021;AM12768;AM00867;AM08633;	FALSE	FALSE
1-27-1	3	AM00282;AM03210;AM12268;	FALSE	FALSE
1-28-1	6	AM03629;AM02231;AM12674;AM12629;AM06777;AM12773;	FALSE	FALSE
1-28-2	3	AM04337;AM01250;AM09509;	FALSE	FALSE
1-29-1	7	AM01171;AM05604;AM06044;AM00651R;AM02075;AM08258;AM12257;	FALSE	FALSE
1-30-1	5	AM05409;AM06113;AM09730;AM03269;AM04416;	FALSE	FALSE
1-32-1	4	AM00997R;AM00213;AM00989R;AM11111;	FALSE	FALSE
1-33-1	4	AM02340;AM00397R;AM01357;AM06384;	FALSE	FALSE
2-1-1	105	AM04663;AM08453;AM08568;AM04377;AM12210;AM01111;AM05945;AM11395;AM03074;AM03252;AM12203;AM05292;AM06136;AM06999;AM09229;AM03645;AM03083;AM04655;AM10308;AM05718;AM07801;AM03225;AM06313;AM09731;AM03063;AM08676;AM07634;AM10965;AM04540;AM03402;AM06526;AM02697;AM09389;AM03334;AM08003;AM08063;AM07558;AM10322;AM11958;AM04766;AM07468;AM10301;AM11078;AM11032;AM08387;AM11516;AM04699;AM09181;AM11956;AM05831…	TRUE	TURE
2-1-2	35	AM11846;AM08704;AM07600;AM11910;AM05584;AM09538;AM02861;AM01235;AM12461;AM08787;AM12894;AM07807;AM11523;AM05633;AM02930;AM08212;AM04109;AM03035;AM07698;AM03612;AM03312;AM06622;AM05645;AM02723;AM05492;AM03647;AM06188;AM02394;AM03511;AM04347;AM04514;AM06420;AM03382;AM03952;AM04587;	TRUE	TURE
2-1-3	35	AM10201;AM08243;AM06365;AM01199;AM05654;AM09378;AM10601;AM08437;AM09900;AM11890;AM03541;AM04105;AM08337;AM02914;AM11313;AM05681;AM08883;AM04378;AM10244;AM10676;AM11504;AM11550;AM07517;AM09683;AM08691;AM12745;AM08396;AM11477;AM10261;AM03823;AM05309;AM12046;AM01327;AM03727;AM08541;	TRUE	TURE
2-1-4	18	AM04600;AM04629;AM11052;AM08848;AM05025;AM08001;AM06655;AM10516;AM08609;AM11543;AM01528;AM02436;AM11252;AM10424;AM12194;AM04258;AM10303;AM10198;	TRUE	TURE
2-1-5	16	AM06633;AM06774;AM07053;AM12007;AM05298;AM02959;AM04384;AM05683;AM06296;AM06948;AM08533;AM00889;AM06853;AM07877;AM07879;AM10209;	TRUE	TURE
2-1-6	9	AM06852;AM05991;AM05144;AM06762;AM11136;AM04999;AM11386;AM07234;AM05848;	TRUE	TURE
2-1-7	5	AM09773;AM05934;AM11394;AM00959;AM09242;	TRUE	TURE
2-1-8	3	AM02716;AM03370;AM04164;	FALSE	FALSE
2-1-9	3	AM02688;AM07683;AM06329;	TRUE	TURE
2-2-1	26	AM08100;AM02998;AM03591;AM03995;AM06802;AM03528;AM04900;AM07528;AM06958;AM07180;AM10059;AM05336;AM11124;AM07960;AM04989;AM11359;AM02882;AM08339;AM09174;AM09510;AM02974;AM09582;AM09073;AM12105;AM03951;AM10996;	TRUE	TURE
2-2-2	11	AM04272;AM12462;AM10530;AM09619;AM10465;AM02728;AM11149;AM04410;AM06287;AM07003;AM11501;	FALSE	FALSE
2-2-3	9	AM06239;AM09168;AM11449;AM08898;AM11200;AM11858;AM12903;AM06368;AM08456;	TRUE	TURE
2-2-4	6	AM02808;AM12856R;AM07145;AM10780;AM03854;AM09750;	TRUE	TURE
2-3-1	17	AM00481;AM05816;AM08768;AM03672;AM07766;AM07890;AM00043;AM01585;AM05417;AM10579;AM10336;AM11531;AM02369;AM00096;AM00109;AM05062;AM03191;	FALSE	FALSE
2-3-2	6	AM07455;AM00323;AM02568;AM10385;AM10291;AM10837;	FALSE	FALSE
2-3-3	5	AM06682;AM03202;AM08821;AM00466;AM01595;	FALSE	FALSE
2-3-4	3	AM11788;AM02542;AM04474;	FALSE	FALSE
2-3-5	3	AM02821;AM08538;AM10653;	FALSE	FALSE
2-4-1	23	AM09318;AM09848;AM10975;AM06200;AM06215;AM10779;AM11742;AM05159;AM06189;AM07196;AM03101;AM06790;AM12801;AM04310;AM10559;AM03997;AM09517;AM04807;AM06382;AM07230;AM12578;AM03461;AM03801;	FALSE	FALSE
2-4-2	8	AM11660;AM03371;AM09896;AM12303;AM03807;AM07606;AM00785;AM01010;	FALSE	FALSE
2-4-3	5	AM11714;AM02881;AM12320;AM06986;AM09158;	FALSE	FALSE
2-4-4	3	AM04553;AM05142;AM04445;	FALSE	FALSE
2-5-1	21	AM09961;AM02991;AM05686;AM09172;AM09865;AM10335;AM06943;AM10858;AM11866;AM03851;AM11849;AM12328;AM12355;AM02368;AM04595;AM06828;AM08080;AM03037;AM07792;AM06985;AM05763;	FALSE	FALSE
2-5-2	10	AM09776;AM06133;AM09241;AM09662;AM11391;AM09129;AM09341;AM02940;AM07537;AM08544;	FALSE	FALSE
2-5-3	5	AM08388;AM11964;AM12652;AM02545;AM06910;	FALSE	FALSE
2-6-1	14	AM00776;AM01648;AM04808;AM00868R;AM03529;AM08285;AM08730;AM08888;AM03821;AM10762;AM05166;AM07336;AM00172;AM09690;	FALSE	FALSE
2-6-2	4	AM12028;AM11717;AM01434;AM03938;	FALSE	FALSE
2-7-1	6	AM12477;AM05895;AM02538;AM05754;AM11421;AM11558;	FALSE	FALSE
2-7-2	5	AM11815;AM09474;AM07730;AM01695;AM03702;	FALSE	FALSE
2-7-3	3	AM04151;AM08436;AM10889;	FALSE	FALSE
2-7-4	3	AM10608;AM11732;AM12375;	FALSE	FALSE
2-8-1	8	AM02751;AM10138;AM07034;AM09549;AM03883;AM04734;AM08597;AM04196;	TRUE	TURE
2-9-1	11	AM02680;AM09012;AM01099;AM01428;AM02077;AM04050;AM05925;AM12676;AM02053;AM03380;AM07128;	FALSE	FALSE
2-9-2	5	AM03581;AM05326;AM04836;AM05091;AM04481;	FALSE	FALSE
2-10-1	6	AM05850;AM07503;AM00887;AM03531;AM12836;AM02247;	FALSE	FALSE
2-11-1	5	AM01116;AM00664;AM00744R;AM02522;AM05789;	FALSE	FALSE
2-11-2	7	AM04256;AM09590;AM10853;AM07086;AM02579;AM03920;AM09188;	FALSE	FALSE
2-12-1	5	AM00427R;AM11683;AM00926R;AM03656;AM00409R;	FALSE	FALSE
2-12-2	3	AM02708;AM04104;AM10011;	FALSE	FALSE
2-13-1	5	AM10200;AM08577;AM10783;AM06659;AM09136;	FALSE	FALSE
2-13-2	4	AM09203;AM02835;AM03287;AM10233;	FALSE	FALSE
2-14-1	6	AM10991;AM11556;AM05978;AM03763;AM03104;AM07373;	FALSE	FALSE
2-14-2	4	AM03818;AM10004;AM03853;AM05283;	FALSE	FALSE
2-15-1	8	AM07873;AM10940;AM11220;AM01380;AM06357;AM08693;AM08700;AM03834;	FALSE	FALSE
2-15-2	3	AM05052;AM09664;AM11797;	FALSE	FALSE
2-16-1	4	AM00082;AM00047;AM08345;AM05728;	FALSE	FALSE
2-17-1	6	AM11013;AM00805;AM06043;AM02217;AM07548;AM09734;	FALSE	FALSE
2-18-1	3	AM01036;AM01414;AM07854;	FALSE	FALSE
2-20-1	4	AM06278;AM11285;AM03405;AM04303;	FALSE	FALSE
2-21-1	5	AM09657;AM03563;AM06800;AM09472;AM08694;	FALSE	FALSE
2-22-1	4	AM04248;AM09632;AM08712;AM06591;	TRUE	TURE
2-23-1	4	AM01214;AM01490;AM08713;AM12626;	FALSE	FALSE
2-25-1	3	AM04026;AM04682;AM12899R;	FALSE	FALSE
2-26-1	3	AM08780;AM09167;AM12884R;	FALSE	FALSE
2-27-1	4	AM07635;AM09148;AM11276;AM11404;	FALSE	FALSE
3-1-1	30	AM08654;AM10157;AM05725;AM09547;AM04146;AM04646;AM04733;AM06784;AM08124;AM06101;AM11494;AM11800;AM06062;AM06404;AM12560;AM06300;AM07815;AM06373;AM07881;AM05806;AM06322;AM08015;AM11070;AM11353;AM11474;AM10037;AM08987;AM02767;AM11009;AM10100;	FALSE	FALSE
3-1-2	11	AM06518;AM07320;AM03295;AM09844;AM03484;AM07089;AM07488;AM09529;AM07175;AM03051;AM05511;	TRUE	TURE
3-1-3	6	AM08850;AM09542;AM09813;AM11400;AM12190;AM05125;	FALSE	FALSE
3-1-4	3	AM05268;AM10323;AM03966;	FALSE	FALSE
3-1-5	3	AM02907;AM08991;AM09052;	FALSE	FALSE
3-2-1	37	AM05219;AM08185;AM09770;AM10123;AM00412;AM03311;AM01468;AM03922;AM06721;AM05010;AM06469;AM07152;AM08689;AM06171;AM06551;AM10969;AM04637;AM08864;AM08615;AM04628;AM08221;AM10937;AM08759;AM10272;AM01505;AM12039;AM04942;AM09329;AM06928;AM08529;AM09182;AM06628;AM11097;AM10267;AM10288;AM02722;AM04761;	FALSE	FALSE
3-2-2	11	AM05620;AM07974;AM12740;AM12074;AM01917;AM01312;AM04385;AM09645;AM01793;AM12828R;AM06266;	FALSE	FALSE
3-2-3	8	AM10074;AM05455;AM11634;AM02526;AM06642;AM10750;AM03241;AM07975;	FALSE	FALSE
3-2-4	3	AM06339;AM07926;AM10436;	FALSE	FALSE
3-2-5	3	AM06877;AM11768;AM12003;	TRUE	TURE
3-3-1	11	AM04244;AM03525;AM07080;AM07322;AM05322;AM10778;AM02033;AM05103;AM03666;AM05057;AM07013;	FALSE	FALSE
3-3-2	7	AM00429;AM00447;AM00793;AM05176;AM05877;AM05957;AM12667;	FALSE	FALSE
3-3-3	3	AM12634;AM06333;AM05320;	FALSE	FALSE
3-3-4	4	AM07721;AM01220;AM09398;AM09926;	FALSE	FALSE
3-4-1	16	AM03741;AM05211;AM11134;AM07657;AM09064;AM02924;AM11332;AM05847;AM11585;AM12520;AM05332;AM05566;AM11491;AM11702;AM03129;AM09379;	FALSE	FALSE
3-4-2	7	AM05915;AM07896;AM11827;AM07568;AM04677;AM08930;AM11264;	FALSE	FALSE
3-5-1	18	AM02446;AM00485;AM01725;AM02006;AM02408;AM08107;AM08763;AM00396;AM03623;AM01534;AM09822;AM02047;AM12159;AM01702;AM06178;AM08035;AM03957;AM11230;	FALSE	FALSE
3-5-2	5	AM01273;AM06705;AM02032;AM09724;AM02264;	TRUE	TURE
3-5-3	5	AM00753;AM00758;AM09154;AM09048;AM10188;	TRUE	TURE
3-6-1	10	AM07624;AM09674;AM04968;AM05311;AM08353;AM12101;AM00626;AM05177;AM05397;AM06330;	FALSE	FALSE
3-6-2	5	AM04246;AM04066;AM08252;AM06683;AM11647;	FALSE	FALSE
3-6-3	3	AM00928R;AM02707;AM08236;	FALSE	FALSE
3-7-1	13	AM02044;AM09059;AM06686;AM04482;AM04531;AM02920;AM04035;AM09993;AM11651;AM12614;AM09358;AM03901;AM09958;	FALSE	FALSE
3-7-2	3	AM06889;AM02311;AM12346;	FALSE	FALSE
3-8-1	6	AM01276;AM08740;AM02510;AM03320;AM08747;AM01408;	TRUE	TURE
3-8-2	3	AM05839;AM03072;AM11864;	FALSE	FALSE
3-9-1	5	AM00812;AM00550;AM05363;AM08664;AM11886;	FALSE	FALSE
3-9-2	3	AM02614;AM00734;AM01242;	FALSE	FALSE
3-10-1	5	AM04598;AM07065;AM05615;AM03331;AM08007;	FALSE	FALSE
3-10-2	3	AM11051;AM04713;AM07577;	FALSE	FALSE
3-11-1	9	AM02761;AM05531;AM07427;AM09201;AM12274;AM07015;AM07864;AM11166;AM05127;	TRUE	TURE
3-12-1	8	AM00017;AM10623;AM04471;AM00720;AM02438;AM03353;AM06135;AM06855;	FALSE	FALSE
3-13-1	5	AM07131;AM11497;AM05845;AM07948;AM01198;	FALSE	FALSE
3-14-1	9	AM03595;AM05138;AM05773;AM06899;AM11608;AM02948;AM10519;AM04106;AM11328;	FALSE	FALSE
3-15-1	5	AM05695;AM07447;AM07584;AM11370;AM11542;	TRUE	TURE
3-16-1	5	AM11221;AM06253;AM03105;AM09548;AM03505;	FALSE	FALSE
3-16-2	4	AM06621;AM10457;AM02729;AM04401;	FALSE	FALSE
3-17-1	8	AM00533;AM01795;AM01938;AM04781;AM05780;AM05857;AM07134;AM08357;	FALSE	FALSE
3-18-1	6	AM02097;AM00445R;AM02285;AM01442;AM08818;AM11983;	FALSE	FALSE
3-18-2	3	AM02062;AM03769;AM09670;	FALSE	FALSE
3-19-1	5	AM06332;AM09431;AM03179;AM10160;AM11802;	FALSE	FALSE
3-20-1	5	AM08591;AM00562;AM03780;AM07122;AM07341;	FALSE	FALSE
3-21-1	3	AM04652;AM08312;AM02757;	FALSE	FALSE
3-22-1	4	AM07460;AM09869;AM03342;AM05353;	FALSE	FALSE
3-24-1	3	AM09084;AM09856;AM05315;	FALSE	FALSE
3-25-1	5	AM12371;AM03279;AM05423;AM10981;AM11084;	FALSE	FALSE
3-26-1	3	AM02239;AM05401;AM08514;	TRUE	TURE
3-27-1	3	AM06491;AM11896;AM12230;	FALSE	FALSE
4-1-1	12	AM00478;AM03149;AM08349;AM08836;AM04262;AM05562;AM08187;AM08299;AM09003;AM07941;AM09257;AM10092;	TRUE	TURE
4-1-2	3	AM09786;AM02752;AM09622;	FALSE	FALSE
4-2-1	9	AM02846;AM10759;AM05879;AM11471;AM03187;AM04402;AM08301;AM09789;AM07161;	FALSE	FALSE
4-3-1	23	AM06376;AM10826;AM01980;AM02945;AM05029;AM05941;AM09141;AM09918;AM10584;AM11505;AM12435;AM04908;AM09677;AM10505;AM07462;AM12550;AM03064;AM03188;AM11715;AM02809;AM08833;AM09243;AM12013;	TRUE	TURE
4-3-2	3	AM04009;AM10055;AM12717;	FALSE	FALSE
4-4-1	9	AM07071;AM12789;AM02188;AM05280;AM08041;AM10099;AM04748;AM07804;AM08062;	FALSE	FALSE
4-4-2	4	AM08134;AM07687;AM11041;AM12152;	FALSE	FALSE
4-5-1	12	AM04138;AM04312;AM08026;AM08224;AM08661;AM11127;AM06457;AM07384;AM08571;AM12420;AM08282;AM12352;	TRUE	TURE
4-6-1	9	AM00425;AM02786;AM02879;AM06460;AM07459;AM07546;AM09050;AM10485;AM12278;	FALSE	FALSE
4-7-1	8	AM02214;AM05236;AM07380;AM07448;AM08378;AM09086;AM11401;AM11982;	FALSE	FALSE
4-8-1	6	AM06914;AM04586;AM09380;AM12602;AM06709;AM10168;	TRUE	TURE
4-9-1	8	AM04003;AM06805;AM07506;AM09268;AM10982;AM12096;AM06381;AM07566;	FALSE	FALSE
4-10-1	5	AM00495;AM05008;AM09555;AM03021;AM05954;	FALSE	FALSE
4-11-1	7	AM04565;AM06267;AM07262;AM08347;AM09521;AM12050;AM04290;	TRUE	TURE
4-12-1	12	AM01206;AM02989;AM03006;AM03301;AM03420;AM05359;AM06486;AM09422;AM11253;AM12870R;AM07079;AM10730;	FALSE	FALSE
4-13-1	3	AM04083;AM08600;AM08435;	TRUE	TURE
4-14-1	5	AM07573;AM08477;AM03383;AM07619;AM03715;	FALSE	FALSE
4-14-2	3	AM10874;AM12528;AM12649;	FALSE	FALSE
4-15-1	6	AM02980;AM05947;AM10373;AM03137;AM02912;AM03495;	FALSE	FALSE
4-16-1	5	AM12083;AM12136;AM02309;AM04562;AM01774;	FALSE	FALSE
4-17-1	8	AM02616;AM06468;AM07437;AM10032;AM10754;AM11048;AM12297;AM05800;	FALSE	FALSE
4-18-1	5	AM03157;AM06283;AM10278;AM11093;AM04747;	FALSE	FALSE
4-19-1	5	AM04287;AM05013;AM10437;AM11512;AM12205;	FALSE	FALSE
4-20-1	6	AM07962;AM11325;AM01565;AM05064;AM09863;AM10865;	FALSE	FALSE
4-21-1	5	AM10428;AM01597;AM06029;AM10127;AM11840;	FALSE	FALSE
4-22-1	7	AM05712;AM07483;AM07649;AM11288;AM03323;AM04640;AM07544;	FALSE	FALSE
4-23-1	4	AM04123;AM12564;AM04977;AM12615;	FALSE	FALSE
4-24-1	6	AM12366;AM02816;AM03664;AM04234;AM06235;AM07979;	FALSE	FALSE
4-25-1	5	AM04552;AM10365;AM04940;AM08149;AM12910;	FALSE	FALSE
4-26-1	6	AM05558;AM09165;AM11206;AM04020;AM09382;AM10215;	FALSE	FALSE
4-27-1	5	AM03476;AM06176;AM05165;AM06848;AM05602;	FALSE	FALSE
4-27-2	3	AM04148;AM06825;AM07575;	FALSE	FALSE
4-28-1	5	AM03237;AM04818;AM05003;AM06903;AM09716;	FALSE	FALSE
4-29-1	4	AM02905;AM09798;AM12336;AM10352;	TRUE	TURE
4-30-1	4	AM05114;AM08882;AM10195;AM02805;	FALSE	FALSE
4-31-1	4	AM09559;AM06297;AM09030;AM09888;	FALSE	FALSE
5-1-1	64	AM01510;AM02553;AM03139;AM03869;AM04360;AM04409;AM07530;AM07931;AM08273;AM08907;AM09861;AM12207;AM03577;AM04130;AM04895;AM05063;AM05392;AM10221;AM11510;AM02632;AM03590;AM07733;AM08875;AM04188;AM09494;AM10569;AM10656;AM11719;AM01465;AM04286;AM08766;AM04515;AM04829;AM05338;AM05797;AM06887;AM09142;AM10083;AM11208;AM11299;AM12387;AM04593;AM07825;AM08728;AM04596;AM05488;AM08408;AM05249;AM06740;AM08023…	TRUE	TURE
5-1-2	8	AM11979;AM07939;AM08391;AM12628;AM01325;AM10330;AM05898;AM09196;	FALSE	FALSE
5-1-3	8	AM01329;AM06362;AM11540;AM11743;AM08372;AM02880;AM11676;AM11685;	TRUE	TURE
5-2-1	13	AM01815;AM00743R;AM08593;AM00020R;AM03915;AM05851;AM03943;AM07955;AM09046;AM11277;AM09108;AM01724;AM03587;	FALSE	FALSE
5-2-2	10	AM06447;AM10081;AM02760;AM03537;AM05228;AM02270;AM11921;AM07449;AM03575;AM01660;	FALSE	FALSE
5-2-3	5	AM04425;AM01298;AM05030;AM01883;AM09186;	FALSE	FALSE
5-2-4	4	AM04798;AM06755;AM07116;AM06830;	FALSE	FALSE
5-2-5	3	AM09637;AM03232;AM10825;	FALSE	FALSE
5-3-1	30	AM09663;AM10329;AM02744;AM09459;AM10163;AM00101;AM05589;AM01618;AM07778;AM08126;AM08213;AM08868;AM10337;AM10712;AM12259;AM05262;AM05690;AM06426;AM10102;AM10411;AM10602;AM11415;AM02801;AM05878;AM07489;AM09707;AM10944;AM07663;AM11059;AM11678;	TRUE	TURE
5-3-2	6	AM08684;AM01176;AM06822;AM06290;AM12017;AM10033;	FALSE	FALSE
5-3-3	3	AM07535;AM04891;AM10704;	FALSE	FALSE
5-4-1	13	AM02674;AM02797;AM03907;AM04979;AM05913;AM05983;AM06109;AM06375;AM06427;AM09390;AM10524;AM11063;AM11099;	FALSE	FALSE
5-5-1	14	AM01607;AM03551;AM03919;AM04674;AM04976;AM08466;AM12119;AM11721;AM12415;AM12746;AM02360;AM02790;AM06009;AM07366;	FALSE	FALSE
5-6-1	8	AM05337;AM12487;AM08013;AM11457;AM12176;AM07078;AM04689;AM10455;	FALSE	FALSE
5-7-1	9	AM03214;AM03294;AM08554;AM09233;AM00093;AM03257;AM06449;AM11932;AM12288;	FALSE	FALSE
5-8-1	7	AM02916;AM11758;AM01521;AM00287;AM00482R;AM00474R;AM00834;	FALSE	FALSE
5-8-2	3	AM00915;AM00990;AM02432;	FALSE	FALSE
5-9-1	8	AM05016;AM06804;AM07340;AM10938;AM11054;AM05004;AM06843;AM07007;	FALSE	FALSE
5-9-2	3	AM06553;AM11766;AM10119;	FALSE	FALSE
5-10-1	5	AM08935;AM00807R;AM08646;AM02384;AM09935;	FALSE	FALSE
5-11-1	8	AM04180;AM07169;AM02656;AM03479;AM04706;AM04851;AM06938;AM10085;	TRUE	TURE
5-12-1	3	AM01407;AM01657;AM01932;	FALSE	FALSE
5-12-2	3	AM03806;AM07918;AM06423;	FALSE	FALSE
5-13-1	9	AM00998;AM05206;AM05818;AM05834;AM06463;AM07552;AM08999;AM09324;AM09826;	FALSE	FALSE
5-14-1	3	AM03506;AM03208;AM07880;	FALSE	FALSE
5-15-1	6	AM02434;AM02601;AM03636;AM06265;AM11937;AM01859;	FALSE	FALSE
5-16-1	5	AM02850;AM04650;AM07255;AM10585;AM02982;	FALSE	FALSE
5-17-1	3	AM02678;AM04266;AM01911;	FALSE	FALSE
5-18-1	3	AM04081;AM10325;AM11215;	FALSE	FALSE
5-19-1	5	AM04592;AM05095;AM11256;AM08385;AM11928;	FALSE	FALSE
5-20-1	3	AM07305;AM09581;AM10124;	FALSE	FALSE
5-21-1	4	AM00119;AM03462;AM08683;AM00433;	FALSE	FALSE
6-1-1	38	AM03744;AM04260;AM05927;AM05932;AM06199;AM06542;AM06568;AM07464;AM10047;AM11026;AM11462;AM11603;AM02551;AM03162;AM05537;AM08291;AM09522;AM12454;AM02892;AM03680;AM03968;AM08081;AM10051;AM03768;AM04743;AM06146;AM06183;AM07622;AM08861;AM08866;AM03884;AM07493;AM08777;AM09024;AM05000;AM07775;AM07607;AM11448;	FALSE	FALSE
6-1-2	7	AM10471;AM09045;AM03850;AM07150;AM08952;AM09214;AM11036;	TRUE	TURE
6-1-3	3	AM10901;AM05785;AM06693;	FALSE	FALSE
6-2-1	17	AM03394;AM04077;AM06036;AM07754;AM03375;AM05869;AM05376;AM07074;AM08159;AM09541;AM09823;AM03584;AM09420;AM10967;AM05386;AM10454;AM11711;	FALSE	FALSE
6-2-2	4	AM05891;AM07596;AM10121;AM05946;	FALSE	FALSE
6-3-1	11	AM01825;AM04363;AM05682;AM06445;AM06898;AM10206;AM11137;AM12853;AM07111;AM10678;AM11792;	FALSE	FALSE
6-4-1	11	AM02203;AM04512;AM04936;AM05306;AM06530;AM08885;AM09270;AM10266;AM11554;AM01284;AM04306;	FALSE	FALSE
6-5-1	7	AM11113;AM12369;AM01782;AM02815;AM11725;AM04739;AM09192;	FALSE	FALSE
6-5-2	3	AM11771;AM04494;AM07670;	TRUE	TURE
6-6-1	9	AM00646;AM08835;AM10854;AM00216;AM00713R;AM11748;AM00588;AM10217;AM10327;	FALSE	FALSE
6-6-2	7	AM03809;AM05661;AM01751;AM00847;AM03847;AM06837;AM11519;	FALSE	FALSE
6-6-3	5	AM01063;AM12456;AM02613;AM03054;AM10509;	FALSE	FALSE
6-6-4	4	AM01754;AM00461;AM02651;AM11828;	FALSE	FALSE
6-6-5	3	AM06927;AM02319;AM11620;	FALSE	FALSE
6-7-1	6	AM02758;AM03828;AM05235;AM05715;AM02350;AM09164;	FALSE	FALSE
6-8-1	6	AM03906;AM05709;AM06282;AM09671;AM10044;AM11244;	FALSE	FALSE
6-9-1	7	AM03923;AM06798;AM07984;AM09728;AM10024;AM11384;AM11680;	FALSE	FALSE
6-10-1	7	AM03159;AM03984;AM08404;AM09028;AM12695;AM07302;AM09736;	TRUE	TURE
6-11-1	9	AM03310;AM06466;AM07181;AM08034;AM08257;AM09104;AM09250;AM10528;AM11762;	FALSE	FALSE
6-12-1	6	AM01358;AM00497;AM00717;AM02114;AM12845;AM00543;	FALSE	FALSE
6-13-1	7	AM06641;AM08973;AM09049;AM10920;AM01790;AM05243;AM06485;	FALSE	FALSE
6-14-1	4	AM01987;AM04434;AM06074;AM02561;	TRUE	TURE
6-15-1	7	AM03116;AM05296;AM06745;AM08513;AM09427;AM12187;AM12804;	FALSE	FALSE
6-16-1	4	AM03497;AM04995;AM09536;AM04795;	FALSE	FALSE
6-17-1	3	AM07751;AM07928;AM10023;	FALSE	FALSE
6-18-1	5	AM01767;AM04772;AM04883;AM11442;AM07031;	FALSE	FALSE
6-19-1	6	AM05580;AM08154;AM08705;AM10983;AM12238;AM12651;	FALSE	FALSE
6-20-1	5	AM03195;AM05563;AM10573;AM12183;AM09655;	FALSE	FALSE
6-21-1	5	AM02769;AM03401;AM04839;AM06019;AM10995;	FALSE	FALSE
6-22-1	5	AM03837;AM03865;AM04866;AM06558;AM11734;	FALSE	FALSE
7-1-1	53	AM01485;AM00660;AM00307;AM01268;AM01719;AM00767R;AM00818;AM00582;AM00624R;AM01681;AM02094;AM05813;AM06486R;AM12800;AM00295;AM11915;AM12250;AM00367R;AM00525R;AM00643;AM00711R;AM00723R;AM00806;AM00935R;AM02349;AM02787;AM05506;AM09087;AM09198;AM00181;AM03677;AM00381;AM00790R;AM00811R;AM01626;AM01269;AM01533;AM07001;AM01912;AM06488R;AM05077;AM06489;AM07107;AM00301;AM02116;AM03206;AM03704;AM11665;AM12…	FALSE	FALSE
7-1-2	10	AM00788;AM00819;AM01640;AM07315;AM01906;AM02743;AM02470;AM06383;AM00681R;AM04679;	FALSE	FALSE
7-1-3	9	AM02212;AM02399;AM00600;AM01470;AM07212;AM01598;AM01620;AM02145;AM02509;	FALSE	FALSE
7-1-4	4	AM00417R;AM05581;AM03936;AM06547;	FALSE	FALSE
7-1-5	4	AM00938;AM10830;AM06851;AM12787;	FALSE	FALSE
7-1-6	4	AM12206;AM06559;AM01885;AM12171;	FALSE	FALSE
7-2-1	19	AM02135;AM04034;AM05662;AM06129;AM00715R;AM00900R;AM01267;AM02423;AM05961;AM07507;AM00586;AM12690;AM04460;AM05216;AM03313;AM00312;AM06063;AM09515;AM09526;	FALSE	FALSE
7-2-2	7	AM02396;AM03501;AM04558;AM07473;AM03128;AM01212;AM01870;	FALSE	FALSE
7-2-3	3	AM11942;AM01226;AM02002;	FALSE	FALSE
7-3-1	32	AM01854;AM02289;AM03539;AM04505;AM01094;AM03296;AM04926;AM07287;AM12298;AM03117;AM10259;AM12501;AM03601;AM04415;AM05330;AM05590;AM12499;AM04614;AM11623;AM06440;AM07820;AM08207;AM07945;AM11066;AM03107;AM04609;AM12301;AM10264;AM09014;AM10949;AM05106;AM02385;	FALSE	FALSE
7-3-2	7	AM07389;AM08989;AM12108;AM02535;AM01252;AM02456;AM03391;	TRUE	TURE
7-3-3	3	AM06663;AM06879;AM00633;	FALSE	FALSE
7-4-1	9	AM00657R;AM03360;AM06337;AM11829;AM00632R;AM07256;AM00189;AM04114;AM09944;	FALSE	FALSE
7-4-2	4	AM02715;AM00024;AM00697;AM02606;	FALSE	FALSE
7-5-1	5	AM07661;AM09889;AM11691;AM00468;AM01222;	FALSE	FALSE
7-6-1	11	AM00262;AM01158;AM01271;AM01908;AM00647;AM02750;AM01258;AM10851;AM00932R;AM00836;AM01492;	FALSE	FALSE
7-6-2	3	AM00049R;AM11010;AM12885;	FALSE	FALSE
7-7-1	8	AM00943R;AM01948;AM02527;AM03795;AM05883;AM10153;AM01256;AM00897;	FALSE	FALSE
7-8-1	11	AM03488;AM03644;AM10990;AM02957;AM04664;AM07409;AM04185;AM04750;AM10812;AM00542;AM02937;	FALSE	FALSE
7-8-2	5	AM08440;AM11490;AM05365;AM08209;AM04826;	FALSE	FALSE
7-9-1	7	AM01791;AM00642;AM01084;AM02069;AM07046;AM12723;AM12849;	FALSE	FALSE
7-10-1	4	AM00535R;AM08284;AM00436;AM09287;	FALSE	FALSE
7-11-1	5	AM00330;AM08908;AM00924R;AM02564;AM11533;	FALSE	FALSE
7-12-1	3	AM01401;AM04017;AM01834;	FALSE	FALSE
7-13-1	3	AM00749R;AM03095;AM01700;	FALSE	FALSE
7-14-1	4	AM00524;AM03913;AM04756;AM07998;	FALSE	FALSE
7-16-1	5	AM00796R;AM03174;AM05687;AM09940;AM11219;	FALSE	FALSE
8-1-1	13	AM01197;AM01548;AM01584;AM01800;AM01804;AM02102;AM01161;AM01785;AM02500;AM01047;AM01763;AM01946;AM01416;	FALSE	FALSE
8-1-2	4	AM01371;AM12902;AM01251;AM02176;	FALSE	FALSE
8-2-1	23	AM00395;AM00453;AM00603;AM00831;AM01348;AM01373;AM01758;AM01821;AM01895;AM02008;AM02146;AM02433;AM02455;AM02541;AM05614;AM07744;AM08176;AM10364;AM10513;AM10700;AM11305;AM12359;AM06399;	TRUE	TURE
8-3-1	8	AM00799;AM01031;AM01954;AM02099;AM03986;AM02152;AM05345;AM06890;	FALSE	FALSE
8-4-1	9	AM00065;AM01369;AM01770;AM01865;AM02517;AM04295;AM07812;AM09801;AM02232;	FALSE	FALSE
8-5-1	13	AM00452;AM01070;AM01290;AM01604;AM02425;AM02485;AM02586;AM02812;AM03330;AM06025;AM07144;AM12043;AM02216;	FALSE	FALSE
8-6-1	6	AM01167;AM01411;AM01746;AM01753;AM02025;AM07932;	FALSE	FALSE
8-7-1	4	AM01306;AM11487;AM01150;AM08841;	FALSE	FALSE
8-8-1	5	AM00382;AM01029;AM01313;AM10447;AM02301;	TRUE	TURE
8-9-1	6	AM12833;AM12884;AM00837;AM01301;AM01539;AM06187;	TRUE	TURE
8-10-1	6	AM01573;AM04267;AM05472;AM05884;AM12066;AM12580;	FALSE	FALSE
8-11-1	6	AM05592;AM06379;AM06498;AM08382;AM01332;AM08152;	FALSE	FALSE
8-12-1	7	AM05116;AM06894;AM08796;AM10374;AM11024;AM11117;AM12063;	FALSE	FALSE
8-13-1	4	AM01204;AM01631;AM02313;AM01755;	FALSE	FALSE
9-1-1	21	AM09855;AM03432;AM04103;AM05795;AM06675;AM02906;AM12661;AM05024;AM12088;AM05672;AM06809;AM03912;AM08174;AM03324;AM08589;AM06976;AM08470;AM12361;AM08476;AM09441;AM03944;	TRUE	TURE
9-1-2	9	AM07163;AM11068;AM04728;AM12455;AM05209;AM11209;AM06306;AM06263;AM11326;	TRUE	TURE
9-1-3	3	AM03407;AM01958;AM02654;	FALSE	FALSE
9-2-1	14	AM03558;AM03930;AM07844;AM09508;AM11499;AM11962;AM02831;AM12112;AM02754;AM03339;AM03118;AM08776;AM03737;AM05290;	TRUE	TURE
9-3-1	7	AM01067;AM04370;AM05948;AM07717;AM03942;AM04794;AM06717;	FALSE	FALSE
9-4-1	9	AM05774;AM06730;AM12117;AM06586;AM08997;AM09076;AM12758;AM02711;AM10593;	FALSE	FALSE
9-4-2	3	AM01833;AM04366;AM12110;	FALSE	FALSE
9-5-1	7	AM04566;AM07898;AM07940;AM11171;AM06456;AM07726;AM01729;	FALSE	FALSE
9-5-2	3	AM02976;AM02607;AM09996;	FALSE	FALSE
9-6-1	8	AM05561;AM06114;AM07876;AM10131;AM04300;AM05824;AM07861;AM09630;	FALSE	FALSE
9-7-1	7	AM03165;AM04320;AM09556;AM06562;AM08449;AM08725;AM09685;	FALSE	FALSE
9-8-1	10	AM00492;AM02468;AM01140;AM03579;AM02218;AM02636;AM09237;AM09308;AM01188;AM08812;	FALSE	FALSE
9-8-2	4	AM11578;AM00517R;AM03281;AM03762;	FALSE	FALSE
9-8-3	3	AM09213;AM07702;AM09558;	TRUE	TURE
9-9-1	7	AM04175;AM04723;AM09412;AM03034;AM03039;AM08398;AM11509;	TRUE	TURE
9-10-1	5	AM06037;AM07285;AM07549;AM04177;AM07220;	FALSE	FALSE
9-11-1	5	AM04304;AM07705;AM02988;AM04040;AM07971;	FALSE	FALSE
9-12-1	5	AM09985;AM10507;AM10775;AM02763;AM03566;	FALSE	FALSE
9-13-1	3	AM03365;AM07742;AM11163;	FALSE	FALSE
9-14-1	3	AM04803;AM05648;AM06612;	TRUE	TURE
9-15-1	5	AM07327;AM07510;AM05428;AM07479;AM11530;	FALSE	FALSE
9-16-1	5	AM04962;AM03671;AM08623;AM10738;AM10816;	FALSE	FALSE
10-1-1	13	AM00002;AM01059;AM01491;AM01710;AM01722;AM02373;AM03115;AM04392;AM00611;AM05761;AM12848R;AM01418;AM00733;	FALSE	FALSE
10-2-1	6	AM04516;AM02972;AM05403;AM09445;AM09681;AM07030;	FALSE	FALSE
10-3-1	5	AM01896;AM04002;AM00976;AM01381;AM01984;	FALSE	FALSE
10-4-1	7	AM02725;AM03978;AM04612;AM06699;AM09345;AM10426;AM10709;	FALSE	FALSE
10-5-1	5	AM02068;AM01464;AM02251;AM02496;AM12565;	FALSE	FALSE
10-6-1	5	AM04207;AM10682;AM12061;AM12228;AM12426;	FALSE	FALSE
10-7-1	4	AM12581;AM02508;AM04624;AM04882;	FALSE	FALSE
10-8-1	4	AM04448;AM08912;AM09578;AM12622;	FALSE	FALSE
10-9-1	6	AM00722;AM04313;AM09428;AM10926;AM11619;AM12281;	FALSE	FALSE
10-10-1	4	AM00802;AM10705;AM00699;AM09767;	FALSE	FALSE
10-11-1	4	AM01005;AM01773;AM10120;AM02968;	FALSE	FALSE
10-12-1	4	AM01243;AM07617;AM08710;AM00766;	FALSE	FALSE
10-13-1	6	AM01699;AM01740;AM01801;AM11061;AM12624;AM08647;	TRUE	TURE
11-1-1	8	AM01379;AM08290;AM07916;AM00234;AM00364;AM04853;AM11357;AM00225;	FALSE	FALSE
11-1-2	3	AM09945;AM01046;AM03881;	FALSE	FALSE
11-2-1	7	AM00669R;AM00670;AM01142;AM04535;AM10298;AM12322;AM09929;	FALSE	FALSE
11-3-1	9	AM00934;AM04930;AM00779R;AM00828;AM00981;AM01732;AM05739;AM08781;AM09537;	FALSE	FALSE
11-4-1	6	AM08332;AM12753R;AM12905;AM02873;AM07978;AM09062;	FALSE	FALSE
11-5-1	6	AM01549;AM02295;AM12779;AM06049;AM09628;AM11296;	FALSE	FALSE
11-6-1	5	AM00687R;AM11738;AM11888;AM02439;AM11650;	FALSE	FALSE
11-6-2	3	AM05381;AM10170;AM11106;	FALSE	FALSE
11-7-1	5	AM00334;AM01071;AM09875;AM10945;AM11135;	FALSE	FALSE
11-8-1	4	AM00411;AM02067;AM04604;AM10959;	FALSE	FALSE
11-9-1	7	AM03332;AM07595;AM11123;AM00268;AM00318;AM00871;AM10155;	FALSE	FALSE
11-10-1	5	AM09170;AM00794;AM01900;AM02495;AM12706R;	FALSE	FALSE
11-11-1	4	AM02612;AM12266;AM00344;AM03526;	FALSE	FALSE
12-1-1	7	AM12685;AM11658;AM05109;AM06108;AM00769R;AM07247;AM08261;	FALSE	FALSE
12-1-2	4	AM06883;AM06906;AM00627;AM09365;	FALSE	FALSE
12-1-3	4	AM01143;AM04259;AM01021R;AM01483;	FALSE	FALSE
12-2-1	5	AM07002;AM03194;AM06930;AM03309;AM08703;	FALSE	FALSE
12-2-2	3	AM08650;AM03783;AM03857;	FALSE	FALSE
12-3-1	4	AM05930;AM01020;AM01395;AM00606R;	FALSE	FALSE
12-4-1	5	AM10594;AM00850R;AM09828;AM00942;AM04877;	FALSE	FALSE
12-5-1	4	AM04036;AM01040;AM00639R;AM02826;	FALSE	FALSE
12-5-2	3	AM05639;AM07197;AM07481;	FALSE	FALSE
12-6-1	5	AM00679;AM08194;AM02714;AM03229;AM05229;	FALSE	FALSE
12-6-2	4	AM09824;AM00651;AM00718;AM04745;	FALSE	FALSE
12-7-1	4	AM02569;AM02598;AM08171;AM08814;	FALSE	FALSE
12-12-1	3	AM00261;AM00385;AM03471;	FALSE	FALSE
12-13-1	3	AM05302;AM08855;AM09205;	FALSE	FALSE
13-1-1	5	AM03903;AM09981;AM04879;AM06390;AM08778;	FALSE	FALSE
13-1-2	4	AM04971;AM02157;AM03764;AM05259;	TRUE	TURE
13-2-1	4	AM08040;AM11654;AM12806;AM11521;	FALSE	FALSE
13-3-1	3	AM07706;AM09029;AM11816;	FALSE	FALSE
13-4-1	3	AM09416;AM02709;AM12367;	FALSE	FALSE
14-1-1	6	AM00987;AM07716;AM08401;AM03020;AM11260;AM12282;	FALSE	FALSE
14-1-2	5	AM02085;AM09564;AM12638;AM04023;AM12354;	FALSE	FALSE
14-1-3	3	AM05078;AM08433;AM08769;	FALSE	FALSE
14-2-1	7	AM05447;AM03969;AM08743;AM09966;AM11380;AM04589;AM08765;	FALSE	FALSE
14-3-1	3	AM12841R;AM07414;AM10836;	TRUE	TURE
14-4-1	4	AM04642;AM06046;AM07569;AM01282;	FALSE	FALSE
14-5-1	4	AM04613;AM00086;AM03742;AM06521;	FALSE	FALSE
14-6-1	4	AM08767;AM10162;AM02549;AM01559;	FALSE	FALSE
14-6-2	3	AM05382;AM07004;AM10932;	FALSE	FALSE
14-7-1	7	AM09056;AM01441;AM07678;AM12627;AM03395;AM04169;AM07106;	FALSE	FALSE
14-8-1	5	AM05642;AM04978;AM06026;AM08130;AM05150;	FALSE	FALSE
14-9-1	4	AM07991;AM02901;AM01756;AM08087;	FALSE	FALSE
14-10-1	4	AM01370;AM06068;AM03812;AM05553;	FALSE	FALSE
14-12-1	3	AM05335;AM07710;AM09930;	FALSE	FALSE
14-13-1	3	AM08863;AM09252;AM01486;	FALSE	FALSE
14-14-1	5	AM00517;AM01965;AM10588;AM11604;AM03908;	FALSE	FALSE
15-1-1	21	AM03770;AM04203;AM11210;AM04915;AM06314;AM03364;AM02531;AM03173;AM04166;AM09121;AM10900;AM11335;AM00523;AM07337;AM12323;AM04429;AM12048;AM05112;AM08981;AM03333;AM12871;	TRUE	TURE
15-1-2	8	AM09051;AM11668;AM02737;AM10657;AM11549;AM04759;AM07491;AM12292;	TRUE	TURE
15-1-3	8	AM10294;AM01191;AM00099;AM04615;AM08324;AM08726;AM09027;AM11850;	TRUE	TURE
15-1-4	6	AM08344;AM02339;AM05992;AM08279;AM12908;AM06842;	TRUE	TURE
15-1-5	5	AM05512;AM07470;AM03745;AM11945;AM02211;	TRUE	TURE
15-1-6	4	AM11056;AM07729;AM09591;AM09923;	TRUE	TURE
15-1-7	4	AM10500;AM11293;AM08102;AM12508;	TRUE	TURE
15-2-1	7	AM02860;AM04033;AM00556;AM08328;AM05844;AM06653;AM09039;	TRUE	TURE
15-2-2	6	AM02325;AM05294;AM12231;AM03615;AM02855;AM06528;	TRUE	TURE
15-2-3	5	AM05968;AM03147;AM05366;AM04136;AM09953;	TRUE	TURE
15-2-4	4	AM09289;AM03480;AM04959;AM10631;	TRUE	TURE
15-2-5	3	AM02540;AM02167;AM02635;	TRUE	TURE
15-3-1	3	AM12887;AM04168;AM05380;	FALSE	FALSE
15-3-2	3	AM10862;AM01231;AM07286;	FALSE	FALSE
15-4-1	5	AM03958;AM04639;AM04830;AM05638;AM09885;	TRUE	TURE
15-5-1	3	AM04546;AM04439;AM10770;	FALSE	FALSE
15-6-1	3	AM00513;AM08251;AM10460;	TRUE	TURE
15-7-1	3	AM06202;AM06519;AM11377;	TRUE	TURE
15-8-1	4	AM10829;AM00719;AM08751;AM09255;	TRUE	TURE
16-1-1	29	AM02293;AM02451;AM10677;AM05006;AM05371;AM07886;AM10512;AM11812;AM06302;AM04157;AM12151;AM04263;AM04656;AM07611;AM08232;AM10036;AM01362;AM02497;AM03346;AM03774;AM07731;AM09079;AM09839;AM03289;AM07532;AM11331;AM04903;AM11191;AM01480;	TRUE	TURE
16-1-2	5	AM06926;AM03369;AM04601;AM03197;AM01563;	FALSE	FALSE
16-1-3	4	AM12826;AM06149;AM10115;AM09609;	FALSE	FALSE
16-1-4	3	AM06573;AM10737;AM04707;	FALSE	FALSE
16-2-1	10	AM01450;AM09892;AM05727;AM06442;AM03103;AM04308;AM06714;AM01599;AM05071;AM05396;	FALSE	FALSE
16-2-2	5	AM04468;AM12163;AM04549;AM05597;AM08318;	FALSE	FALSE
16-3-1	3	AM00884;AM06066;AM03084;	FALSE	FALSE
16-4-1	4	AM01123;AM07735;AM10897;AM04837;	FALSE	FALSE
16-5-1	6	AM05255;AM08038;AM04427;AM11581;AM09078;AM10150;	FALSE	FALSE
16-6-1	6	AM03040;AM04442;AM06414;AM09596;AM12064;AM07920;	FALSE	FALSE
16-7-1	3	AM05995;AM08217;AM03403;	FALSE	FALSE
16-8-1	7	AM04251;AM04862;AM05796;AM06226;AM08132;AM10801;AM11161;	FALSE	FALSE
16-10-1	5	AM11737;AM06555;AM07037;AM12869;AM04213;	FALSE	FALSE
17-1-1	17	AM00759;AM00963R;AM01146;AM01566;AM02262;AM02862;AM03743;AM04975;AM05367;AM07553;AM08136;AM10110;AM10366;AM11936;AM12700;AM12756;AM12878;	TRUE	TURE
17-2-1	5	AM02701;AM01893;AM02372;AM02670;AM03691;	FALSE	FALSE
17-2-2	4	AM00457;AM00410;AM00556R;AM01042;	FALSE	FALSE
17-2-3	3	AM04574;AM01928;AM00681;	FALSE	FALSE
17-3-1	5	AM12135;AM06846;AM08779;AM06451;AM02795;	FALSE	FALSE
17-3-2	4	AM00464;AM03494;AM05971;AM08079;	TRUE	TURE
17-4-1	9	AM00244;AM00361;AM04740;AM11854;AM00360;AM02738;AM10109;AM09386;AM09554;	TRUE	TURE
17-5-1	9	AM12798;AM00352;AM00353;AM00354;AM00355;AM00356;AM00357;AM00358;AM00359;	FALSE	FALSE
17-6-1	5	AM03437;AM02499;AM03632;AM10029;AM11481;	FALSE	FALSE
17-7-1	3	AM06214;AM00438;AM12887R;	TRUE	TURE
18-2-1	5	AM08862;AM12218;AM05749;AM07531;AM09557;	FALSE	FALSE
18-3-1	6	AM11194;AM05769;AM07444;AM10679;AM05393;AM08071;	TRUE	TURE
18-5-1	6	AM02476;AM11251;AM10935;AM03209;AM02296;AM08153;	FALSE	FALSE
18-5-2	3	AM03348;AM01009;AM03204;	FALSE	FALSE
18-5-3	3	AM02049;AM02076;AM02562;	FALSE	FALSE
18-6-1	3	AM05468;AM03909;AM07688;	FALSE	FALSE
19-1-1	11	AM02927;AM05253;AM05349;AM06484;AM06738;AM08263;AM09387;AM09615;AM11570;AM11616;AM12536;	TRUE	TURE
19-2-1	11	AM06744;AM09031;AM09109;AM11801;AM06715;AM06350;AM07576;AM07757;AM08416;AM11722;AM12184;	FALSE	FALSE
19-3-1	8	AM01004;AM03238;AM03872;AM04087;AM06904;AM08025;AM11844;AM11874;	FALSE	FALSE
19-4-1	8	AM12893;AM00235;AM01653;AM03802;AM01187;AM08715;AM09096;AM10348;	FALSE	FALSE
19-4-2	4	AM01931;AM05976;AM07252;AM04703;	FALSE	FALSE
19-5-1	8	AM01506;AM03182;AM06649;AM07422;AM09496;AM10048;AM12021;AM12882;	FALSE	FALSE
19-6-1	5	AM01172;AM03207;AM05244;AM05348;AM06076;	FALSE	FALSE
20-1-1	4	AM03694;AM03827;AM09756;AM00496;	FALSE	FALSE
21-1-1	8	AM07799;AM08914;AM09017;AM09072;AM10136;AM10340;AM11242;AM11329;	TRUE	TURE
21-2-1	5	AM03785;AM05981;AM06110;AM06590;AM03711;	FALSE	FALSE
21-3-1	3	AM04338;AM08672;AM05951;	FALSE	FALSE
21-4-1	3	AM09879;AM00923;AM03203;	FALSE	FALSE
22-1-1	7	AM03874;AM05356;AM06861;AM07274;AM08085;AM06884;AM11160;	TRUE	TURE
22-1-2	3	AM01100;AM08274;AM09132;	TRUE	TURE
22-2-1	3	AM11900;AM03163;AM12781;	TRUE	TURE
22-3-1	5	AM00092;AM09871;AM06484R;AM09057;AM04793;	FALSE	FALSE
22-3-2	4	AM02314;AM01403;AM01201;AM02204;	FALSE	FALSE
22-3-3	4	AM01055;AM01734;AM06596;AM12129;	TRUE	TURE
22-4-1	3	AM05514;AM09326;AM11525;	FALSE	FALSE
23-1-1	5	AM08825;AM10332;AM03514;AM04405;AM05675;	FALSE	FALSE
23-2-1	6	AM03679;AM05777;AM08177;AM10689;AM11754;AM06733;	FALSE	FALSE
23-3-1	5	AM03396;AM05593;AM09105;AM10434;AM12914;	FALSE	FALSE
23-4-1	5	AM02942;AM03434;AM04395;AM09986;AM10433;	FALSE	FALSE
24-1-1	7	AM00658R;AM05085;AM02328;AM02342;AM12855R;AM00659R;AM01502;	FALSE	FALSE
24-1-2	3	AM00371R;AM01863;AM01892;	FALSE	FALSE
24-2-1	3	AM00745R;AM01614;AM07752;	FALSE	FALSE
25-1-1	5	AM02825;AM04647;AM07850;AM10375;AM07679;	FALSE	FALSE
25-2-1	7	AM03428;AM05184;AM05347;AM09175;AM10038;AM10425;AM11699;	FALSE	FALSE
25-3-1	7	AM01097;AM03089;AM05072;AM06195;AM07988;AM11839;AM12153;	FALSE	FALSE
25-4-1	6	AM04719;AM07266;AM07642;AM07722;AM11055;AM11197;	FALSE	FALSE
25-5-1	6	AM00077;AM00958;AM01489;AM05611;AM05924;AM12559;	FALSE	FALSE
25-6-1	3	AM02803;AM03240;AM04153;	FALSE	FALSE
25-8-1	3	AM05738;AM00531R;AM00773R;	FALSE	FALSE
25-8-2	3	AM00128;AM05424;AM07291;	FALSE	FALSE
26-1-1	10	AM00021;AM00645;AM03091;AM05426;AM05655;AM06657;AM07541;AM09829;AM11248;AM11315;	FALSE	FALSE
26-2-1	6	AM01760;AM04423;AM05467;AM08227;AM11202;AM12899;	FALSE	FALSE
26-3-1	5	AM01340;AM06878;AM07346;AM07451;AM11865;	FALSE	FALSE
26-4-1	5	AM00937;AM02174;AM02079;AM09197;AM11782;	FALSE	FALSE
27-1-1	4	AM05582;AM03932;AM10488;AM09116;	TRUE	TURE
27-2-1	5	AM03570;AM04957;AM08267;AM11003;AM12012;	FALSE	FALSE
28-1-1	3	AM02730;AM03860;AM07787;	FALSE	FALSE
28-2-1	5	AM02886;AM01799;AM02378;AM07221;AM09660;	FALSE	FALSE
28-3-1	5	AM03826;AM04140;AM08977;AM11830;AM12603;	FALSE	FALSE
29-1-1	9	AM02488;AM04665;AM05528;AM06038;AM07771;AM09155;AM09163;AM10501;AM11948;	FALSE	FALSE
29-2-1	4	AM07222;AM07229;AM07780;AM02954;	FALSE	FALSE
29-3-1	4	AM03524;AM07364;AM12229;AM12506;	FALSE	FALSE
29-4-1	4	AM04591;AM08206;AM10361;AM02683;	FALSE	FALSE
30-1-1	7	AM04342;AM04817;AM08677;AM02691;AM05203;AM05577;AM11537;	TRUE	TURE
30-2-1	4	AM08975;AM12090;AM12547;AM07888;	TRUE	TURE
30-3-1	6	AM02966;AM04249;AM08057;AM10644;AM12224;AM12600;	TRUE	TURE
30-4-1	4	AM02755;AM07829;AM10612;AM05770;	FALSE	FALSE
31-1-1	8	AM03538;AM04316;AM04466;AM05678;AM06691;AM07914;AM08709;AM09830;	FALSE	FALSE
31-2-1	4	AM06058;AM07987;AM08044;AM06467;	FALSE	FALSE
32-1-1	3	AM02588;AM10929;AM12271;	FALSE	FALSE
32-2-1	5	AM02639;AM04161;AM06346;AM10191;AM10234;	FALSE	FALSE
35-1-1	4	AM06002;AM02897;AM02899;AM08793;	FALSE	FALSE
35-2-1	4	AM03143;AM03600;AM04323;AM10788;	FALSE	FALSE
35-3-1	3	AM00751R;AM06681;AM07008;	FALSE	FALSE

## Sheet: Sheet1
Coherent Cluster derived from fat data				* CoherentCluster ID named by "WGCNA moduleID-TightClusterID-coherent moduleID"
Coherent Clusters			Maturation				USP				JHA				Vg				Summary
ID	Size	Genes	Fat list pvalue	Overlapping genes in fat list	Brain list pvalue	Overlapping genes in brain list	ChIP list pvalue	Overlapping genes in ChIP list	RNAi list pvalue	Overlapping genes in RNAi list	Fat list pvalue	Overlapping genes in fat list	Brain list pvalue	Overlapping genes in brain list	Fat list pvalue	Overlapping genes in fat list	Brain list pvalue	Overlapping genes in brain list	Maturation-related	JHA, Vg or USP related
1-1-1	28	AM07207;AM03055;AM01577;AM00630;AM02348;AM12891;AM00888R;AM00186;AM00379R;AM00971R;AM00594R;AM03889;AM00930R;AM12599;AM00953R;AM00979;AM00448;AM01520;AM00572R;AM04822;AM00820R;AM09297;AM00902;AM02706;AM01261;AM08985;AM02629;AM03123;	0.984829	AM02348;AM08985	0.956521	AM00979	1	NA	1	NA	1	NA	0.810103	AM01577	1	NA	0.928077	AM00594R;AM01520;AM04822;AM00902	FALSE	FALSE
1-1-2	12	AM01062;AM09368;AM07167;AM07048;AM01941;AM01975;AM07056;AM00713;AM12486;AM01646;AM02038;AM01532;	1	NA	1	NA	1	NA	1	NA	1	NA	1	NA	1	NA	0.315068	AM01062;AM00713;AM01646;AM01532	FALSE	FALSE
1-1-3	9	AM12785;AM09957;AM10552;AM04526;AM00870R;AM05622;AM02225;AM00653R;AM12882R;	1	NA	0.63471	AM10552	1	NA	1	NA	1	NA	1	NA	1	NA	0.913696	AM00653R	FALSE	FALSE
1-1-4	7	AM00938R;AM01508;AM04860;AM10844;AM11868;AM12858R;AM06561;	1	NA	1	NA	1	NA	1	NA	1	NA	1	NA	1	NA	0.851222	AM10844	FALSE	FALSE
1-1-5	7	AM01953;AM10107;AM03560;AM06041;AM00304;AM02407;AM04271;	1	NA	1	NA	1	NA	1	NA	1	NA	1	NA	0.317531	AM01953;AM00304	0.525327	AM01953;AM04271	FALSE	FALSE
1-1-6	4	AM01936;AM10369;AM01457;AM08887;	1	NA	1	NA	1	NA	1	NA	1	NA	1	NA	1	NA	0.663312	AM10369	FALSE	FALSE
1-1-7	3	AM12389;AM01890;AM00393;	1	NA	1	NA	1	NA	1	NA	1	NA	1	NA	1	NA	1	NA	FALSE	FALSE
1-2-1	19	AM04509;AM02794;AM00499R;AM00197;AM01347;AM08237;AM00854R;AM06105;AM05781;AM07411;AM00046R;AM00575;AM03049;AM12866R;AM09658;AM12876R;AM01108;AM00240;AM00705R;	1	NA	1	NA	1	NA	1	NA	1	NA	0.675962	AM01108	0.96541	AM12866R	0.960644	AM12866R;AM00240	FALSE	FALSE
1-2-2	10	AM11569;AM06676;AM10143;AM05233;AM11472;AM07523;AM02064;AM02949;AM09075;AM09469;	1	NA	0.673395	AM06676	1	NA	1	NA	1	NA	1	NA	1	NA	0.934271	AM11569	FALSE	FALSE
1-2-3	8	AM01173;AM09054;AM00764;AM06425;AM00089;AM12814;AM00855R;AM02589;	1	NA	1	NA	1	NA	1	NA	1	NA	1	NA	0.757283	AM00089	1	NA	FALSE	FALSE
1-2-4	4	AM01864;AM01996;AM02392;AM09232;	1	NA	1	NA	1	NA	1	NA	1	NA	1	NA	1	NA	0.242007	AM01864;AM02392	FALSE	FALSE
1-2-5	4	AM06896;AM10111;AM05450;AM08972;	1	NA	1	NA	1	NA	1	NA	1	NA	1	NA	1	NA	1	NA	FALSE	FALSE
1-2-6	3	AM03108;AM05375;AM05565;	1	NA	1	NA	1	NA	1	NA	1	NA	1	NA	1	NA	1	NA	FALSE	FALSE
1-3-1	16	AM00488;AM01260;AM05192;AM10493;AM10672;AM00957R;AM00212;AM12239;AM00018;AM00551R;AM01781;AM00399;AM04928;AM08859;AM10669;AM11834;	0.972197	AM10669	0.83318	AM00018	1	NA	1	NA	1	NA	1	NA	1	NA	0.159685	AM05192;AM12239;AM01781;AM00399;AM04928;AM10669	FALSE	FALSE
1-3-2	7	AM00393R;AM01336;AM01279;AM00736;AM02110;AM02144;AM03536;	1	NA	0.1643	AM02110;AM03536	1	NA	1	NA	1	NA	0.339644	AM02110	1	NA	0.219515	AM01336;AM01279;AM02110	FALSE	FALSE
1-4-1	43	AM03622;AM03786;AM12269;AM03747;AM03698;AM07921;AM02107;AM10690;AM09533;AM03507;AM04858;AM05289;AM10537;AM01018;AM07810;AM09588;AM11436;AM06401;AM00384;AM00391;AM04079;AM02543;AM04710;AM05319;AM07767;AM01899;AM02230;AM04367;AM04843;AM09883;AM10819;AM11755;AM12483;AM09463;AM12752;AM00056;AM01077;AM01950;AM03815;AM03231;AM06882;AM00444;AM03663;	0.00683676	AM03622;AM03698;AM09533;AM04858;AM01018;AM07810;AM00391;AM02543;AM04710;AM11755;AM12752;AM00056;AM01077;AM01950;AM06882;AM03663	1.86122e-05	AM03786;AM03747;AM07921;AM10690;AM03507;AM04858;AM01018;AM07810;AM06401;AM10819;AM11755;AM12483;AM06882;AM00444;AM03663	0.791923	AM03698;AM03231	1	NA	1	NA	0.922132	AM11755	0.396446	AM07921;AM06401;AM04079;AM02543;AM02230;AM04367;AM11755;AM01077	0.986353	AM03698;AM12483;AM12752;AM01077;AM00444	TRUE	TURE
1-4-2	20	AM06385;AM02096;AM08143;AM10079;AM10280;AM11397;AM10182;AM02782;AM07561;AM09994;AM11673;AM11989;AM00956;AM12863;AM02426;AM07333;AM03654;AM05557;AM10834;AM12850;	0.590869	AM02096;AM10079;AM11989;AM12850	0.0146051	AM06385;AM10079;AM02782;AM12863;AM05557;AM12850	1	NA	1	NA	1	NA	0.321154	AM10182;AM03654	0.651872	AM10079;AM05557;AM12850	0.73736	AM07561;AM03654;AM10834;AM12850	TRUE	TURE
1-4-3	13	AM12234;AM00983;AM03259;AM07516;AM07383;AM10649;AM03752;AM11407;AM03709;AM01613;AM05588;AM08695;AM09904;	0.254146	AM11407;AM05588;AM08695;AM09904	0.0409194	AM10649;AM11407;AM03709;AM05588	0.0513575	AM03259;AM11407;AM09904	1	NA	0.237676	AM05588	1	NA	0.647642	AM07516;AM10649	0.376305	AM10649;AM11407;AM03709;AM09904	TRUE	TURE
1-4-4	12	AM02944;AM11115;AM06924;AM06454;AM02877;AM03430;AM09272;AM05230;AM11646;AM02800;AM10145;AM12272;	0.443457	AM11115;AM02877;AM05230	0.367758	AM05230;AM10145	0.563992	AM09272	1	NA	1	NA	1	NA	0.115664	AM02944;AM02877;AM05230;AM02800	0.81865	AM02877;AM02800	FALSE	FALSE
1-4-5	10	AM06154;AM05096;AM08856;AM04493;AM06946;AM04309;AM01887;AM00489;AM09211;AM10154;	0.121678	AM05096;AM04309;AM00489;AM09211	0.286542	AM06154;AM08856	1	NA	1	NA	1	NA	0.447274	AM01887	0.21225	AM05096;AM04309;AM01887	0.00259067	AM06154;AM08856;AM04493;AM06946;AM04309;AM01887;AM00489	FALSE	FALSE
1-4-6	6	AM06315;AM00409;AM10546;AM00518;AM04810;AM03141;	0.09945	AM00409;AM04810;AM03141	0.00157174	AM00409;AM00518;AM04810;AM03141	0.339627	AM04810	1	NA	1	NA	1	NA	0.252377	AM00409;AM00518	0.0316954	AM00409;AM00518;AM04810;AM03141	TRUE	TURE
1-4-7	5	AM06814;AM00395R;AM06317;AM03973;AM12143;	0.673407	AM06317	1	NA	1	NA	1	NA	1	NA	1	NA	1	NA	0.0914568	AM00395R;AM06317;AM12143	FALSE	FALSE
1-4-8	5	AM02506;AM01454;AM02080;AM05917;AM07776;	0.263731	AM02506;AM02080	1	NA	1	NA	1	NA	1	NA	1	NA	0.187578	AM02506;AM01454	0.342374	AM01454;AM05917	FALSE	FALSE
1-4-9	3	AM05148;AM06702;AM10785;	0.488991	AM05148	0.285096	AM10785	1	NA	1	NA	1	NA	0.162906	AM10785	0.411887	AM05148	1	NA	FALSE	FALSE
1-4-10	3	AM09183;AM01668;AM11639;	0.10446	AM09183;AM01668	1	NA	0.187347	AM09183	1	NA	1	NA	1	NA	0.411887	AM01668	1	NA	FALSE	FALSE
1-5-1	10	AM02029;AM04755;AM10090;AM03504;AM09405;AM12318;AM02732;AM00703;AM12406;AM02092;	0.893388	AM09405	1	NA	0.140531	AM03504;AM12406	1	NA	1	NA	0.447274	AM03504	1	NA	0.934271	AM04755	FALSE	FALSE
1-5-2	4	AM06796;AM02185;AM03602;AM03831;	1	NA	1	NA	1	NA	1	NA	1	NA	1	NA	1	NA	1	NA	FALSE	FALSE
1-5-3	3	AM00616R;AM02090;AM12847;	1	NA	1	NA	1	NA	1	NA	1	NA	1	NA	1	NA	1	NA	FALSE	FALSE
1-5-4	3	AM09836;AM03684;AM03890;	1	NA	0.285096	AM03890	1	NA	1	NA	1	NA	1	NA	0.411887	AM03684	1	NA	FALSE	FALSE
1-6-1	12	AM04991;AM06175;AM06722;AM01993;AM02165;AM05117;AM03554;AM06051;AM04280;AM07471;AM03228;AM09689;	0.931881	AM05117	1	NA	0.563992	AM06722	1	NA	1	NA	1	NA	0.602555	AM06175;AM01993	0.961877	AM06051	FALSE	FALSE
1-6-2	3	AM00869;AM00689R;AM09873;	1	NA	1	NA	0.187347	AM09873	1	NA	1	NA	1	NA	1	NA	0.557986	AM00869	FALSE	FALSE
1-6-3	3	AM01507;AM09462;AM08957;	1	NA	0.285096	AM01507	1	NA	1	NA	1	NA	0.162906	AM01507	1	NA	0.143201	AM01507;AM09462	FALSE	FALSE
1-7-1	14	AM00904;AM01074;AM11337;AM00961;AM01540;AM02056;AM04165;AM01703;AM01322;AM00549R;AM00967R;AM04527;AM06291;AM09988;	0.956479	AM00904	0.7913	AM06291	0.620356	AM06291	1	NA	1	NA	0.00684678	AM01074;AM01540;AM02056;AM01703	1	NA	0.977891	AM01322	FALSE	FALSE
1-7-2	5	AM03267;AM06065;AM03971;AM07101;AM12620;	0.673407	AM06065	1	NA	1	NA	1	NA	1	NA	1	NA	1	NA	1	NA	FALSE	FALSE
1-8-1	5	AM03393;AM00200;AM00846;AM12892R;AM00816R;	1	NA	1	NA	1	NA	1	NA	1	NA	1	NA	1	NA	1	NA	FALSE	FALSE
1-9-1	16	AM08649;AM03658;AM08865;AM04194;AM07794;AM06358;AM09552;AM11403;AM04093;AM05164;AM11856;AM05247;AM02595;AM05515;AM06952;AM08121;	0.650145	AM03658;AM05515;AM08121	0.235957	AM09552;AM05515;AM08121	1	NA	1	NA	1	NA	0.612815	AM05164	1	NA	0.987179	AM05515	FALSE	FALSE
1-9-2	5	AM10773;AM06064;AM00058R;AM05118;AM02622;	1	NA	1	NA	1	NA	1	NA	1	NA	1	NA	1	NA	1	NA	FALSE	FALSE
1-9-3	3	AM04492;AM09475;AM00678;	0.488991	AM04492	0.285096	AM00678	1	NA	1	NA	1	NA	1	NA	1	NA	0.557986	AM00678	FALSE	FALSE
1-10-1	5	AM08129;AM08687;AM08617;AM09446;AM07946;	1	NA	0.428442	AM07946	1	NA	1	NA	1	NA	1	NA	1	NA	1	NA	FALSE	FALSE
1-11-1	11	AM00473;AM00685R;AM10413;AM00243;AM00699R;AM01478;AM11823;AM02130;AM02876;AM05937;AM05491;	1	NA	1	NA	1	NA	1	NA	0.20516	AM02130	0.479106	AM02130	1	NA	1	NA	FALSE	FALSE
1-12-1	7	AM01503;AM00733R;AM00804R;AM06487R;AM09979;AM12716;AM04939;	0.791286	AM12716	1	NA	1	NA	1	NA	1	NA	1	NA	1	NA	1	NA	FALSE	FALSE
1-13-1	7	AM01061;AM00183;AM00707R;AM00959R;AM02209;AM05075;AM00862;	0.791286	AM05075	1	NA	0.383765	AM00862	1	NA	1	NA	0.339644	AM02209	1	NA	1	NA	FALSE	FALSE
1-14-1	4	AM06888;AM00528;AM03178;AM04340;	0.591472	AM04340	0.360772	AM04340	1	NA	1	NA	1	NA	1	NA	1	NA	1	NA	FALSE	FALSE
1-15-1	8	AM00219;AM00227;AM00250;AM00467;AM00574R;AM01015;AM03184;AM06929;	1	NA	1	NA	1	NA	1	NA	1	NA	1	NA	0.381223	AM00219;AM01015	1	NA	FALSE	FALSE
1-16-1	5	AM06674;AM10218;AM05120;AM02884;AM05436;	1	NA	1	NA	1	NA	1	NA	1	NA	1	NA	1	NA	1	NA	FALSE	FALSE
1-17-1	5	AM04341;AM07165;AM01363;AM00491R;AM10122;	1	NA	1	NA	0.29233	AM07165	1	NA	1	NA	1	NA	1	NA	1	NA	FALSE	FALSE
1-18-1	6	AM06316;AM12808;AM09998;AM04110;AM04594;AM08300;	0.738914	AM12808	0.488954	AM04110	1	NA	1	NA	1	NA	1	NA	0.0579814	AM12808;AM09998;AM04594	0.437952	AM09998;AM08300	FALSE	FALSE
1-18-2	3	AM12803;AM08090;AM00966;	0.488991	AM00966	1	NA	1	NA	1	NA	1	NA	0.162906	AM12803	1	NA	0.013511	AM12803;AM08090;AM00966	FALSE	FALSE
1-18-3	3	AM00852;AM01007;AM06288;	1	NA	1	NA	1	NA	1	NA	1	NA	1	NA	1	NA	0.143201	AM00852;AM06288	FALSE	FALSE
1-19-1	3	AM00288;AM00522;AM08365;	1	NA	0.285096	AM00522	1	NA	1	NA	1	NA	1	NA	1	NA	0.557986	AM00522	FALSE	FALSE
1-19-2	3	AM02785;AM05807;AM07019;	0.488991	AM05807	1	NA	0.187347	AM05807	1	NA	0.0606837	AM05807	1	NA	0.411887	AM05807	1	NA	FALSE	FALSE
1-20-1	8	AM01452;AM08147;AM12749;AM00199;AM00280;AM00415R;AM00922R;AM03960;	1	NA	0.591446	AM12749	1	NA	1	NA	1	NA	1	NA	1	NA	1	NA	FALSE	FALSE
1-21-1	3	AM01499;AM04067;AM03416;	1	NA	1	NA	1	NA	1	NA	1	NA	1	NA	1	NA	1	NA	FALSE	FALSE
1-21-2	3	AM07381;AM10484;AM11227;	1	NA	1	NA	1	NA	1	NA	1	NA	1	NA	1	NA	1	NA	FALSE	FALSE
1-22-1	6	AM00094;AM12418;AM05685;AM07667;AM04389;AM06490R;	1	NA	1	NA	0.339627	AM07667	1	NA	1	NA	1	NA	1	NA	1	NA	FALSE	FALSE
1-23-1	3	AM01574;AM06279;AM01429;	1	NA	1	NA	1	NA	1	NA	1	NA	1	NA	1	NA	1	NA	FALSE	FALSE
1-24-1	5	AM00486;AM07363;AM08175;AM09604;AM02040;	1	NA	1	NA	0.29233	AM07363	1	NA	1	NA	1	NA	0.587203	AM00486	0.743546	AM02040	FALSE	FALSE
1-25-1	4	AM00187;AM00493R;AM00204;AM00838R;	1	NA	1	NA	1	NA	1	NA	1	NA	1	NA	1	NA	1	NA	FALSE	FALSE
1-26-1	4	AM01021;AM12768;AM00867;AM08633;	0.591472	AM01021	1	NA	0.0244332	AM12768;AM08633	1	NA	1	NA	1	NA	0.507278	AM12768	0.663312	AM00867	FALSE	FALSE
1-27-1	3	AM00282;AM03210;AM12268;	1	NA	1	NA	1	NA	1	NA	1	NA	1	NA	1	NA	1	NA	FALSE	FALSE
1-28-1	6	AM03629;AM02231;AM12674;AM12629;AM06777;AM12773;	0.345872	AM12629;AM12773	0.125886	AM12629;AM06777	1	NA	1	NA	1	NA	1	NA	0.252377	AM12674;AM12773	0.804665	AM12674	FALSE	FALSE
1-28-2	3	AM04337;AM01250;AM09509;	1	NA	0.285096	AM01250	0.187347	AM04337	1	NA	1	NA	1	NA	1	NA	0.143201	AM04337;AM01250	FALSE	FALSE
1-29-1	7	AM01171;AM05604;AM06044;AM00651R;AM02075;AM08258;AM12257;	0.791286	AM12257	1	NA	0.383765	AM06044	1	NA	1	NA	1	NA	0.710275	AM12257	0.851222	AM08258	FALSE	FALSE
1-30-1	5	AM05409;AM06113;AM09730;AM03269;AM04416;	0.673407	AM09730	1	NA	1	NA	1	NA	1	NA	1	NA	0.587203	AM09730	1	NA	FALSE	FALSE
1-32-1	4	AM00997R;AM00213;AM00989R;AM11111;	1	NA	1	NA	0.241651	AM11111	1	NA	1	NA	1	NA	1	NA	0.663312	AM11111	FALSE	FALSE
1-33-1	4	AM02340;AM00397R;AM01357;AM06384;	1	NA	1	NA	1	NA	1	NA	1	NA	1	NA	1	NA	1	NA	FALSE	FALSE
2-1-1	105	AM04663;AM08453;AM08568;AM04377;AM12210;AM01111;AM05945;AM11395;AM03074;AM03252;AM12203;AM05292;AM06136;AM06999;AM09229;AM03645;AM03083;AM04655;AM10308;AM05718;AM07801;AM03225;AM06313;AM09731;AM03063;AM08676;AM07634;AM10965;AM04540;AM03402;AM06526;AM02697;AM09389;AM03334;AM08003;AM08063;AM07558;AM10322;AM11958;AM04766;AM07468;AM10301;AM11078;AM11032;AM08387;AM11516;AM04699;AM09181;AM11956;AM05831…	0.0608417	AM08568;AM09229;AM03645;AM03083;AM04540;AM03402;AM09389;AM08003;AM04766;AM11032;AM04699;AM11057;AM09668;AM05190;AM06522;AM11630;AM07192;AM08027;AM08030;AM10242;AM09491;AM10886;AM10359;AM06735;AM11761;AM12289;AM03653;AM12645	0.0491717	AM04377;AM05945;AM11395;AM06136;AM03645;AM07801;AM03063;AM10965;AM02697;AM11516;AM08558;AM12542;AM09668;AM11630;AM08030;AM10242;AM06128	0.711076	AM02697;AM05831;AM09775;AM05342;AM03148;AM03653	1	NA	1	NA	0.400648	AM05718;AM03402;AM05831;AM12542;AM09775;AM11720;AM04330	0.0471528	AM09229;AM03083;AM05718;AM03225;AM03402;AM02697;AM11078;AM11032;AM09181;AM06758;AM12542;AM09668;AM05190;AM03463;AM06141;AM06522;AM11630;AM05551;AM08027;AM08030;AM09491;AM12289;AM03653;AM00892	0.00978241	AM05945;AM12203;AM05292;AM10308;AM09389;AM10322;AM04766;AM07468;AM11032;AM04699;AM11956;AM12542;AM02946;AM12122;AM04666;AM11720;AM09913;AM11630;AM08005;AM05551;AM11039;AM07192;AM08027;AM03148;AM05861;AM08030;AM09491;AM10886;AM10359;AM06735;AM11761;AM03553;AM04330;AM07827;AM06128;AM00892	TRUE	TURE
2-1-2	35	AM11846;AM08704;AM07600;AM11910;AM05584;AM09538;AM02861;AM01235;AM12461;AM08787;AM12894;AM07807;AM11523;AM05633;AM02930;AM08212;AM04109;AM03035;AM07698;AM03612;AM03312;AM06622;AM05645;AM02723;AM05492;AM03647;AM06188;AM02394;AM03511;AM04347;AM04514;AM06420;AM03382;AM03952;AM04587;	0.00532326	AM11846;AM07600;AM01235;AM12461;AM08787;AM12894;AM08212;AM04109;AM03647;AM06188;AM02394;AM04514;AM06420;AM03382	0.731653	AM12461;AM06622;AM03952	0.417233	AM05633;AM02723;AM06420	1	NA	1	NA	0.00331887	AM11846;AM11910;AM07807;AM05633;AM03612;AM03647;AM03382	0.51113	AM11846;AM08787;AM07698;AM03647;AM02394;AM06420	2.36237e-05	AM11846;AM08704;AM11910;AM01235;AM08787;AM07807;AM11523;AM05633;AM02930;AM04109;AM07698;AM03612;AM02723;AM05492;AM03647;AM06188;AM03511;AM04347;AM04514;AM03382	TRUE	TURE
2-1-3	35	AM10201;AM08243;AM06365;AM01199;AM05654;AM09378;AM10601;AM08437;AM09900;AM11890;AM03541;AM04105;AM08337;AM02914;AM11313;AM05681;AM08883;AM04378;AM10244;AM10676;AM11504;AM11550;AM07517;AM09683;AM08691;AM12745;AM08396;AM11477;AM10261;AM03823;AM05309;AM12046;AM01327;AM03727;AM08541;	0.000142756	AM08243;AM06365;AM01199;AM05654;AM08437;AM03541;AM02914;AM11313;AM05681;AM10676;AM07517;AM09683;AM08691;AM12745;AM03823;AM12046;AM03727	0.309952	AM05681;AM10244;AM03823;AM05309;AM03727	1	NA	1	NA	1	NA	0.606231	AM10201;AM10601	0.00692184	AM10201;AM09378;AM08437;AM09900;AM03541;AM05681;AM08883;AM10244;AM07517;AM08691;AM12745;AM05309	9.79984e-05	AM10201;AM08243;AM08437;AM03541;AM02914;AM11313;AM08883;AM04378;AM10244;AM10676;AM11504;AM07517;AM12745;AM08396;AM11477;AM10261;AM05309;AM01327;AM03727	TRUE	TURE
2-1-4	18	AM04600;AM04629;AM11052;AM08848;AM05025;AM08001;AM06655;AM10516;AM08609;AM11543;AM01528;AM02436;AM11252;AM10424;AM12194;AM04258;AM10303;AM10198;	0.0517656	AM04629;AM06655;AM08609;AM01528;AM02436;AM11252;AM10198	0.0349192	AM04600;AM04629;AM08848;AM01528;AM10198	1	NA	1	NA	1	NA	0.081299	AM08001;AM02436;AM12194	0.332288	AM04600;AM04629;AM06655;AM08609	0.0438694	AM04600;AM04629;AM08001;AM08609;AM01528;AM02436;AM12194;AM10303	TRUE	TURE
2-1-5	16	AM06633;AM06774;AM07053;AM12007;AM05298;AM02959;AM04384;AM05683;AM06296;AM06948;AM08533;AM00889;AM06853;AM07877;AM07879;AM10209;	0.860477	AM06633;AM05298	0.00436294	AM06633;AM04384;AM05683;AM06296;AM08533;AM07877	0.66944	AM02959	1	NA	1	NA	1	NA	0.253932	AM06633;AM07053;AM04384;AM10209	0.159685	AM07053;AM12007;AM02959;AM05683;AM00889;AM10209	TRUE	TURE
2-1-6	9	AM06852;AM05991;AM05144;AM06762;AM11136;AM04999;AM11386;AM07234;AM05848;	0.0197513	AM05991;AM05144;AM11136;AM07234;AM05848	1	NA	1	NA	1	NA	1	NA	0.4135	AM05991	0.442215	AM05144;AM11136	0.670589	AM05991;AM07234	TRUE	TURE
2-1-7	5	AM09773;AM05934;AM11394;AM00959;AM09242;	0.00677361	AM09773;AM05934;AM11394;AM09242	0.428442	AM00959	1	NA	1	NA	0.0990867	AM05934	1	NA	1	NA	0.743546	AM05934	TRUE	TURE
2-1-8	3	AM02716;AM03370;AM04164;	0.10446	AM02716;AM03370	0.285096	AM02716	1	NA	1	NA	1	NA	0.162906	AM02716	1	NA	0.557986	AM02716	FALSE	FALSE
2-1-9	3	AM02688;AM07683;AM06329;	0.10446	AM02688;AM07683	0.00118303	AM02688;AM07683;AM06329	1	NA	1	NA	1	NA	1	NA	0.0703402	AM02688;AM07683	0.557986	AM07683	TRUE	TURE
2-2-1	26	AM08100;AM02998;AM03591;AM03995;AM06802;AM03528;AM04900;AM07528;AM06958;AM07180;AM10059;AM05336;AM11124;AM07960;AM04989;AM11359;AM02882;AM08339;AM09174;AM09510;AM02974;AM09582;AM09073;AM12105;AM03951;AM10996;	0.000136357	AM03591;AM03995;AM03528;AM07528;AM07180;AM10059;AM05336;AM11124;AM02882;AM09582;AM09073;AM12105;AM03951;AM10996	0.0502819	AM03591;AM06958;AM10059;AM07960;AM04989;AM09510	1	NA	1	NA	1	NA	1	NA	0.627777	AM10059;AM05336;AM04989;AM10996	7.97694e-06	AM02998;AM03591;AM03995;AM10059;AM05336;AM11124;AM07960;AM04989;AM11359;AM02882;AM08339;AM09174;AM02974;AM09582;AM09073;AM12105;AM03951	TRUE	TURE
2-2-2	11	AM04272;AM12462;AM10530;AM09619;AM10465;AM02728;AM11149;AM04410;AM06287;AM07003;AM11501;	0.162167	AM04272;AM09619;AM02728;AM06287	0.102301	AM09619;AM10465;AM11501	1	NA	1	NA	1	NA	1	NA	0.0879677	AM09619;AM02728;AM07003;AM11501	0.507861	AM04272;AM04410;AM11501	FALSE	FALSE
2-2-3	9	AM06239;AM09168;AM11449;AM08898;AM11200;AM11858;AM12903;AM06368;AM08456;	0.0197513	AM06239;AM09168;AM11449;AM11858;AM12903	0.245336	AM08898;AM08456	0.0184109	AM06239;AM09168;AM11858	1	NA	1	NA	1	NA	0.00791694	AM06239;AM11449;AM11200;AM11858;AM12903	0.0402759	AM06239;AM11449;AM08898;AM11200;AM06368	TRUE	TURE
2-2-4	6	AM02808;AM12856R;AM07145;AM10780;AM03854;AM09750;	0.017091	AM12856R;AM07145;AM10780;AM09750	0.488954	AM02808	1	NA	1	NA	1	NA	1	NA	0.252377	AM02808;AM09750	0.804665	AM09750	TRUE	TURE
2-3-1	17	AM00481;AM05816;AM08768;AM03672;AM07766;AM07890;AM00043;AM01585;AM05417;AM10579;AM10336;AM11531;AM02369;AM00096;AM00109;AM05062;AM03191;	1	NA	0.850856	AM00096	0.100364	AM08768;AM05417;AM03191	1	NA	0.298785	AM05816	0.635123	AM08768	0.78825	AM08768;AM00109	0.93825	AM07766;AM00043	FALSE	FALSE
2-3-2	6	AM07455;AM00323;AM02568;AM10385;AM10291;AM10837;	1	NA	1	NA	1	NA	1	NA	1	NA	1	NA	1	NA	1	NA	FALSE	FALSE
2-3-3	5	AM06682;AM03202;AM08821;AM00466;AM01595;	0.263731	AM00466;AM01595	0.428442	AM01595	1	NA	1	NA	1	NA	0.256502	AM08821	0.587203	AM06682	0.743546	AM01595	FALSE	FALSE
2-3-4	3	AM11788;AM02542;AM04474;	0.488991	AM11788	1	NA	1	NA	1	NA	1	NA	1	NA	0.411887	AM11788	0.557986	AM02542	FALSE	FALSE
2-3-5	3	AM02821;AM08538;AM10653;	0.488991	AM08538	1	NA	1	NA	1	NA	1	NA	0.162906	AM08538	1	NA	1	NA	FALSE	FALSE
2-4-1	23	AM09318;AM09848;AM10975;AM06200;AM06215;AM10779;AM11742;AM05159;AM06189;AM07196;AM03101;AM06790;AM12801;AM04310;AM10559;AM03997;AM09517;AM04807;AM06382;AM07230;AM12578;AM03461;AM03801;	0.307404	AM09848;AM10779;AM05159;AM12801;AM04310;AM03461	0.716169	AM04310;AM03461	1	NA	1	NA	1	NA	0.384931	AM10559;AM03461	0.0235639	AM10975;AM06215;AM10779;AM11742;AM05159;AM06189;AM12801;AM03997	0.0744441	AM06200;AM10779;AM05159;AM07196;AM03101;AM06790;AM04310;AM10559;AM03997	FALSE	FALSE
2-4-2	8	AM11660;AM03371;AM09896;AM12303;AM03807;AM07606;AM00785;AM01010;	0.0566866	AM03371;AM09896;AM03807;AM07606	0.591446	AM01010	1	NA	1	NA	1	NA	0.377666	AM03807	0.757283	AM03371	0.0222068	AM11660;AM03371;AM09896;AM03807;AM01010	FALSE	FALSE
2-4-3	5	AM11714;AM02881;AM12320;AM06986;AM09158;	0.0582705	AM12320;AM06986;AM09158	1	NA	1	NA	1	NA	1	NA	1	NA	0.587203	AM11714	0.342374	AM11714;AM06986	FALSE	FALSE
2-4-4	3	AM04553;AM05142;AM04445;	0.488991	AM05142	1	NA	1	NA	1	NA	1	NA	1	NA	1	NA	0.557986	AM04553	FALSE	FALSE
2-5-1	21	AM09961;AM02991;AM05686;AM09172;AM09865;AM10335;AM06943;AM10858;AM11866;AM03851;AM11849;AM12328;AM12355;AM02368;AM04595;AM06828;AM08080;AM03037;AM07792;AM06985;AM05763;	0.822951	AM09865;AM12355;AM04595	0.175829	AM10335;AM06943;AM03851;AM08080	0.766175	AM02368	1	NA	1	NA	1	NA	0.245921	AM02991;AM06943;AM03851;AM11849;AM06828	0.215943	AM02991;AM06943;AM11866;AM12328;AM12355;AM04595;AM08080	FALSE	FALSE
2-5-2	10	AM09776;AM06133;AM09241;AM09662;AM11391;AM09129;AM09341;AM02940;AM07537;AM08544;	0.121678	AM09129;AM09341;AM02940;AM08544	0.0805112	AM09776;AM09129;AM02940	1	NA	1	NA	1	NA	0.447274	AM02940	0.0639315	AM09776;AM09341;AM02940;AM08544	0.197238	AM09776;AM09129;AM02940;AM08544	FALSE	FALSE
2-5-3	5	AM08388;AM11964;AM12652;AM02545;AM06910;	0.263731	AM08388;AM12652	0.428442	AM12652	1	NA	1	NA	1	NA	1	NA	0.187578	AM08388;AM12652	0.743546	AM12652	FALSE	FALSE
2-6-1	14	AM00776;AM01648;AM04808;AM00868R;AM03529;AM08285;AM08730;AM08888;AM03821;AM10762;AM05166;AM07336;AM00172;AM09690;	0.956479	AM07336	0.445105	AM03529;AM07336	0.620356	AM04808	1	NA	0.253433	AM10762	1	NA	1	NA	0.977891	AM00172	FALSE	FALSE
2-6-2	4	AM12028;AM11717;AM01434;AM03938;	0.591472	AM12028	1	NA	1	NA	1	NA	1	NA	1	NA	0.507278	AM01434	1	NA	FALSE	FALSE
2-7-1	6	AM12477;AM05895;AM02538;AM05754;AM11421;AM11558;	0.738914	AM11421	0.488954	AM05754	0.339627	AM05895	1	NA	1	NA	0.299304	AM11558	0.0579814	AM12477;AM02538;AM11421	0.151218	AM12477;AM02538;AM05754	FALSE	FALSE
2-7-2	5	AM11815;AM09474;AM07730;AM01695;AM03702;	1	NA	1	NA	1	NA	1	NA	1	NA	0.0294382	AM09474;AM03702	0.587203	AM01695	0.342374	AM09474;AM01695	FALSE	FALSE
2-7-3	3	AM04151;AM08436;AM10889;	1	NA	1	NA	1	NA	1	NA	1	NA	1	NA	1	NA	1	NA	FALSE	FALSE
2-7-4	3	AM10608;AM11732;AM12375;	0.488991	AM12375	0.285096	AM10608	1	NA	1	NA	1	NA	1	NA	0.0703402	AM10608;AM12375	0.557986	AM11732	FALSE	FALSE
2-8-1	8	AM02751;AM10138;AM07034;AM09549;AM03883;AM04734;AM08597;AM04196;	0.010499	AM02751;AM07034;AM09549;AM03883;AM08597	1	NA	0.424957	AM07034	1	NA	1	NA	0.377666	AM08597	0.0278819	AM09549;AM03883;AM04734;AM08597	0.0222068	AM02751;AM07034;AM04734;AM08597;AM04196	TRUE	TURE
2-9-1	11	AM02680;AM09012;AM01099;AM01428;AM02077;AM04050;AM05925;AM12676;AM02053;AM03380;AM07128;	0.162167	AM01099;AM01428;AM02077;AM07128	0.707986	AM02680	1	NA	1	NA	1	NA	0.12896	AM01099;AM02053	0.0879677	AM01428;AM02077;AM05925;AM07128	8.33301e-05	AM01099;AM01428;AM02077;AM04050;AM05925;AM12676;AM02053;AM03380;AM07128	FALSE	FALSE
2-9-2	5	AM03581;AM05326;AM04836;AM05091;AM04481;	0.673407	AM04836	1	NA	1	NA	1	NA	1	NA	1	NA	1	NA	0.743546	AM04836	FALSE	FALSE
2-10-1	6	AM05850;AM07503;AM00887;AM03531;AM12836;AM02247;	0.738914	AM02247	0.488954	AM07503	1	NA	1	NA	1	NA	0.299304	AM02247	0.654169	AM12836	0.151218	AM03531;AM12836;AM02247	FALSE	FALSE
2-11-1	5	AM01116;AM00664;AM00744R;AM02522;AM05789;	1	NA	0.428442	AM05789	1	NA	1	NA	1	NA	0.256502	AM05789	0.587203	AM02522	0.743546	AM02522	FALSE	FALSE
2-11-2	7	AM04256;AM09590;AM10853;AM07086;AM02579;AM03920;AM09188;	0.424683	AM04256;AM02579	1	NA	0.0747951	AM03920;AM09188	1	NA	1	NA	1	NA	0.710275	AM03920	1	NA	FALSE	FALSE
2-12-1	5	AM00427R;AM11683;AM00926R;AM03656;AM00409R;	1	NA	0.428442	AM11683	1	NA	1	NA	1	NA	1	NA	0.587203	AM11683	1	NA	FALSE	FALSE
2-12-2	3	AM02708;AM04104;AM10011;	1	NA	1	NA	1	NA	1	NA	1	NA	1	NA	1	NA	1	NA	FALSE	FALSE
2-13-1	5	AM10200;AM08577;AM10783;AM06659;AM09136;	0.673407	AM06659	0.428442	AM08577	1	NA	1	NA	1	NA	1	NA	1	NA	0.0914568	AM10200;AM10783;AM09136	FALSE	FALSE
2-13-2	4	AM09203;AM02835;AM03287;AM10233;	1	NA	0.0580681	AM02835;AM10233	1	NA	1	NA	1	NA	1	NA	1	NA	0.242007	AM09203;AM02835	FALSE	FALSE
2-14-1	6	AM10991;AM11556;AM05978;AM03763;AM03104;AM07373;	0.09945	AM11556;AM05978;AM03104	0.488954	AM11556	1	NA	1	NA	1	NA	1	NA	0.654169	AM03104	0.0316954	AM11556;AM05978;AM03763;AM07373	FALSE	FALSE
2-14-2	4	AM03818;AM10004;AM03853;AM05283;	1	NA	1	NA	1	NA	1	NA	1	NA	1	NA	1	NA	1	NA	FALSE	FALSE
2-15-1	8	AM07873;AM10940;AM11220;AM01380;AM06357;AM08693;AM08700;AM03834;	0.204137	AM10940;AM01380;AM06357	0.204377	AM06357;AM08700	1	NA	1	NA	1	NA	1	NA	0.126454	AM10940;AM06357;AM08693	0.292362	AM07873;AM10940;AM11220	FALSE	FALSE
2-15-2	3	AM05052;AM09664;AM11797;	0.488991	AM09664	1	NA	1	NA	1	NA	1	NA	0.162906	AM09664	0.00425929	AM05052;AM09664;AM11797	1	NA	FALSE	FALSE
2-16-1	4	AM00082;AM00047;AM08345;AM05728;	1	NA	1	NA	1	NA	1	NA	1	NA	0.211089	AM05728	1	NA	1	NA	FALSE	FALSE
2-17-1	6	AM11013;AM00805;AM06043;AM02217;AM07548;AM09734;	0.345872	AM11013;AM09734	1	NA	0.339627	AM06043	1	NA	1	NA	1	NA	0.654169	AM11013	0.437952	AM06043;AM07548	FALSE	FALSE
2-18-1	3	AM01036;AM01414;AM07854;	0.10446	AM01036;AM01414	1	NA	1	NA	1	NA	1	NA	1	NA	0.0703402	AM01036;AM01414	0.143201	AM01036;AM07854	FALSE	FALSE
2-20-1	4	AM06278;AM11285;AM03405;AM04303;	0.181547	AM06278;AM11285	0.360772	AM06278	1	NA	1	NA	1	NA	1	NA	1	NA	0.663312	AM04303	FALSE	FALSE
2-21-1	5	AM09657;AM03563;AM06800;AM09472;AM08694;	0.263731	AM09657;AM06800	0.428442	AM09657	1	NA	1	NA	1	NA	1	NA	0.587203	AM09472	0.342374	AM09657;AM09472	FALSE	FALSE
2-22-1	4	AM04248;AM09632;AM08712;AM06591;	0.0273724	AM04248;AM08712;AM06591	0.0580681	AM04248;AM09632	1	NA	1	NA	1	NA	1	NA	0.125713	AM09632;AM06591	0.0443947	AM04248;AM09632;AM06591	TRUE	TURE
2-23-1	4	AM01214;AM01490;AM08713;AM12626;	1	NA	1	NA	1	NA	1	NA	1	NA	1	NA	0.507278	AM08713	0.242007	AM01214;AM01490	FALSE	FALSE
2-25-1	3	AM04026;AM04682;AM12899R;	1	NA	1	NA	0.187347	AM04026	1	NA	1	NA	1	NA	1	NA	0.557986	AM12899R	FALSE	FALSE
2-26-1	3	AM08780;AM09167;AM12884R;	0.10446	AM09167;AM12884R	1	NA	1	NA	1	NA	1	NA	1	NA	0.0703402	AM09167;AM12884R	0.143201	AM08780;AM12884R	FALSE	FALSE
2-27-1	4	AM07635;AM09148;AM11276;AM11404;	0.181547	AM07635;AM09148	0.360772	AM07635	1	NA	1	NA	1	NA	0.0183585	AM09148;AM11276	0.125713	AM07635;AM09148	0.242007	AM07635;AM09148	FALSE	FALSE
3-1-1	30	AM08654;AM10157;AM05725;AM09547;AM04146;AM04646;AM04733;AM06784;AM08124;AM06101;AM11494;AM11800;AM06062;AM06404;AM12560;AM06300;AM07815;AM06373;AM07881;AM05806;AM06322;AM08015;AM11070;AM11353;AM11474;AM10037;AM08987;AM02767;AM11009;AM10100;	0.39569	AM04146;AM11494;AM07815;AM08015;AM11474;AM11009;AM10100	0.393933	AM12560;AM06373;AM07881;AM08015	0.874658	AM05806	1	NA	1	NA	0.0267918	AM06101;AM12560;AM05806;AM02767;AM11009	0.202881	AM08654;AM09547;AM07815;AM05806;AM11474;AM02767;AM11009	0.00514272	AM04646;AM06101;AM11800;AM06062;AM12560;AM06300;AM07815;AM07881;AM05806;AM06322;AM08015;AM10037;AM08987;AM10100	FALSE	FALSE
3-1-2	11	AM06518;AM07320;AM03295;AM09844;AM03484;AM07089;AM07488;AM09529;AM07175;AM03051;AM05511;	0.0508227	AM03295;AM03484;AM07089;AM09529;AM03051	0.0224054	AM07320;AM03295;AM09529;AM05511	1	NA	1	NA	1	NA	1	NA	0.258857	AM03295;AM09529;AM05511	0.0965321	AM06518;AM07320;AM03295;AM09529;AM05511	TRUE	TURE
3-1-3	6	AM08850;AM09542;AM09813;AM11400;AM12190;AM05125;	0.345872	AM09813;AM05125	0.125886	AM09542;AM05125	0.339627	AM11400	1	NA	1	NA	1	NA	0.654169	AM09813	0.0316954	AM09542;AM09813;AM11400;AM05125	FALSE	FALSE
3-1-4	3	AM05268;AM10323;AM03966;	0.488991	AM05268	0.285096	AM05268	1	NA	1	NA	1	NA	1	NA	0.411887	AM05268	0.143201	AM10323;AM03966	FALSE	FALSE
3-1-5	3	AM02907;AM08991;AM09052;	0.10446	AM08991;AM09052	0.285096	AM08991	0.187347	AM08991	1	NA	1	NA	0.162906	AM08991	0.00425929	AM02907;AM08991;AM09052	0.557986	AM08991	FALSE	FALSE
3-2-1	37	AM05219;AM08185;AM09770;AM10123;AM00412;AM03311;AM01468;AM03922;AM06721;AM05010;AM06469;AM07152;AM08689;AM06171;AM06551;AM10969;AM04637;AM08864;AM08615;AM04628;AM08221;AM10937;AM08759;AM10272;AM01505;AM12039;AM04942;AM09329;AM06928;AM08529;AM09182;AM06628;AM11097;AM10267;AM10288;AM02722;AM04761;	0.192761	AM08185;AM01468;AM03922;AM08221;AM08759;AM12039;AM06928;AM10267;AM02722;AM04761	0.1919	AM04637;AM08615;AM08759;AM12039;AM02722;AM04761	0.922848	AM10288	1	NA	1	NA	0.888756	AM06928	0.133499	AM05219;AM08185;AM06171;AM08221;AM10937;AM09329;AM06928;AM06628;AM02722	0.0177083	AM08185;AM01468;AM04637;AM08864;AM08615;AM04628;AM10937;AM08759;AM01505;AM04942;AM09329;AM06928;AM09182;AM10267;AM10288	FALSE	FALSE
3-2-2	11	AM05620;AM07974;AM12740;AM12074;AM01917;AM01312;AM04385;AM09645;AM01793;AM12828R;AM06266;	0.679467	AM01917;AM01312	1	NA	1	NA	1	NA	1	NA	1	NA	0.0218681	AM07974;AM12074;AM01917;AM01312;AM04385	0.00566084	AM12074;AM01917;AM01312;AM09645;AM01793;AM12828R;AM06266	FALSE	FALSE
3-2-3	8	AM10074;AM05455;AM11634;AM02526;AM06642;AM10750;AM03241;AM07975;	0.0566866	AM11634;AM06642;AM03241;AM07975	0.204377	AM02526;AM10750	1	NA	1	NA	1	NA	1	NA	0.126454	AM10074;AM11634;AM02526	0.000274507	AM10074;AM05455;AM11634;AM02526;AM10750;AM03241;AM07975	FALSE	FALSE
3-2-4	3	AM06339;AM07926;AM10436;	0.488991	AM06339	0.285096	AM06339	0.187347	AM07926	1	NA	1	NA	1	NA	0.411887	AM06339	0.557986	AM06339	FALSE	FALSE
3-2-5	3	AM06877;AM11768;AM12003;	0.488991	AM12003	0.0312127	AM11768;AM12003	1	NA	1	NA	1	NA	0.162906	AM12003	0.0703402	AM06877;AM12003	1	NA	TRUE	TURE
3-3-1	11	AM04244;AM03525;AM07080;AM07322;AM05322;AM10778;AM02033;AM05103;AM03666;AM05057;AM07013;	0.679467	AM10778;AM07013	1	NA	0.53275	AM07322	1	NA	1	NA	0.479106	AM05322	0.857305	AM07080	0.777563	AM04244;AM07080	FALSE	FALSE
3-3-2	7	AM00429;AM00447;AM00793;AM05176;AM05877;AM05957;AM12667;	0.424683	AM00429;AM05877	0.543062	AM00447	1	NA	1	NA	1	NA	1	NA	0.710275	AM05877	0.851222	AM05877	FALSE	FALSE
3-3-3	3	AM12634;AM06333;AM05320;	1	NA	1	NA	0.187347	AM12634	1	NA	1	NA	1	NA	1	NA	0.143201	AM06333;AM05320	FALSE	FALSE
3-3-4	4	AM07721;AM01220;AM09398;AM09926;	0.591472	AM01220	1	NA	1	NA	1	NA	1	NA	0.211089	AM07721	1	NA	1	NA	FALSE	FALSE
3-4-1	16	AM03741;AM05211;AM11134;AM07657;AM09064;AM02924;AM11332;AM05847;AM11585;AM12520;AM05332;AM05566;AM11491;AM11702;AM03129;AM09379;	0.082392	AM03741;AM09064;AM02924;AM05847;AM11585;AM09379	0.51687	AM11702;AM03129	1	NA	1	NA	1	NA	0.234093	AM11585;AM05566	0.0333848	AM03741;AM07657;AM11332;AM11585;AM05332;AM03129	0.987179	AM07657	FALSE	FALSE
3-4-2	7	AM05915;AM07896;AM11827;AM07568;AM04677;AM08930;AM11264;	0.424683	AM11827;AM11264	0.543062	AM04677	1	NA	1	NA	1	NA	1	NA	0.317531	AM11827;AM04677	0.0601554	AM07896;AM07568;AM04677;AM11264	FALSE	FALSE
3-5-1	18	AM02446;AM00485;AM01725;AM02006;AM02408;AM08107;AM08763;AM00396;AM03623;AM01534;AM09822;AM02047;AM12159;AM01702;AM06178;AM08035;AM03957;AM11230;	0.133998	AM02446;AM08763;AM01534;AM02047;AM03957;AM11230	0.582181	AM08107;AM11230	1	NA	1	NA	1	NA	0.277708	AM08763;AM09822	0.154459	AM00485;AM08763;AM12159;AM08035;AM03957	1.93395e-05	AM02446;AM00485;AM01725;AM02006;AM08107;AM08763;AM03623;AM02047;AM12159;AM01702;AM06178;AM03957;AM11230	FALSE	FALSE
3-5-2	5	AM01273;AM06705;AM02032;AM09724;AM02264;	0.00677361	AM01273;AM06705;AM02032;AM02264	1	NA	1	NA	1	NA	1	NA	0.256502	AM01273	0.587203	AM02032	0.743546	AM09724	TRUE	TURE
3-5-3	5	AM00753;AM00758;AM09154;AM09048;AM10188;	0.0582705	AM00753;AM09048;AM10188	0.0100351	AM00753;AM09048;AM10188	1	NA	1	NA	1	NA	1	NA	0.187578	AM09048;AM10188	0.342374	AM00753;AM09048	TRUE	TURE
3-6-1	10	AM07624;AM09674;AM04968;AM05311;AM08353;AM12101;AM00626;AM05177;AM05397;AM06330;	0.625794	AM07624;AM05311	1	NA	1	NA	1	NA	1	NA	0.109535	AM05177;AM05397	1	NA	0.934271	AM06330	FALSE	FALSE
3-6-2	5	AM04246;AM04066;AM08252;AM06683;AM11647;	1	NA	1	NA	1	NA	1	NA	1	NA	0.256502	AM11647	1	NA	0.342374	AM08252;AM06683	FALSE	FALSE
3-6-3	3	AM00928R;AM02707;AM08236;	0.10446	AM02707;AM08236	0.285096	AM08236	1	NA	1	NA	1	NA	0.162906	AM08236	1	NA	0.557986	AM00928R	FALSE	FALSE
3-7-1	13	AM02044;AM09059;AM06686;AM04482;AM04531;AM02920;AM04035;AM09993;AM11651;AM12614;AM09358;AM03901;AM09958;	0.945551	AM09993	0.407046	AM11651;AM09958	1	NA	1	NA	1	NA	0.537381	AM09059	0.899866	AM04482	0.852792	AM04531;AM09358	FALSE	FALSE
3-7-2	3	AM06889;AM02311;AM12346;	1	NA	1	NA	0.187347	AM06889	1	NA	1	NA	1	NA	0.411887	AM12346	1	NA	FALSE	FALSE
3-8-1	6	AM01276;AM08740;AM02510;AM03320;AM08747;AM01408;	0.017091	AM08740;AM02510;AM03320;AM08747	0.488954	AM02510	1	NA	1	NA	1	NA	0.00332944	AM01276;AM08740;AM03320	0.0579814	AM08740;AM03320;AM01408	0.00368232	AM01276;AM08740;AM02510;AM03320;AM08747	TRUE	TURE
3-8-2	3	AM05839;AM03072;AM11864;	0.488991	AM05839	0.285096	AM03072	1	NA	1	NA	1	NA	1	NA	0.411887	AM03072	0.143201	AM03072;AM11864	FALSE	FALSE
3-9-1	5	AM00812;AM00550;AM05363;AM08664;AM11886;	1	NA	1	NA	1	NA	1	NA	1	NA	1	NA	0.587203	AM05363	0.743546	AM00550	FALSE	FALSE
3-9-2	3	AM02614;AM00734;AM01242;	0.488991	AM01242	1	NA	1	NA	1	NA	1	NA	0.162906	AM02614	1	NA	0.557986	AM00734	FALSE	FALSE
3-10-1	5	AM04598;AM07065;AM05615;AM03331;AM08007;	0.263731	AM04598;AM05615	0.428442	AM05615	0.29233	AM08007	1	NA	1	NA	1	NA	0.587203	AM05615	0.0914568	AM04598;AM07065;AM05615	FALSE	FALSE
3-10-2	3	AM11051;AM04713;AM07577;	0.488991	AM11051	0.285096	AM11051	0.187347	AM07577	1	NA	1	NA	0.162906	AM11051	0.411887	AM11051	0.143201	AM11051;AM07577	FALSE	FALSE
3-11-1	9	AM02761;AM05531;AM07427;AM09201;AM12274;AM07015;AM07864;AM11166;AM05127;	0.0197513	AM12274;AM07015;AM07864;AM11166;AM05127	0.0101649	AM09201;AM07015;AM07864;AM05127	1	NA	1	NA	1	NA	0.4135	AM02761	0.0438539	AM02761;AM12274;AM07015;AM07864	0.36636	AM05531;AM11166;AM05127	TRUE	TURE
3-12-1	8	AM00017;AM10623;AM04471;AM00720;AM02438;AM03353;AM06135;AM06855;	0.498199	AM00720;AM03353	0.591446	AM00720	0.0954244	AM00017;AM06855	1	NA	1	NA	0.377666	AM02438	0.757283	AM00720	0.292362	AM00017;AM02438;AM03353	FALSE	FALSE
3-13-1	5	AM07131;AM11497;AM05845;AM07948;AM01198;	0.0582705	AM07131;AM11497;AM01198	1	NA	0.29233	AM07948	1	NA	0.0990867	AM05845	0.256502	AM01198	0.187578	AM07131;AM11497	0.342374	AM07131;AM11497	FALSE	FALSE
3-14-1	9	AM03595;AM05138;AM05773;AM06899;AM11608;AM02948;AM10519;AM04106;AM11328;	0.866628	AM05773	0.63471	AM05138	1	NA	1	NA	1	NA	1	NA	0.796666	AM04106	0.670589	AM05773;AM11328	FALSE	FALSE
3-15-1	5	AM05695;AM07447;AM07584;AM11370;AM11542;	0.263731	AM07584;AM11542	0.0100351	AM07447;AM07584;AM11370	1	NA	1	NA	1	NA	0.256502	AM07447	0.0329148	AM07447;AM07584;AM11542	0.342374	AM07584;AM11542	TRUE	TURE
3-16-1	5	AM11221;AM06253;AM03105;AM09548;AM03505;	1	NA	1	NA	1	NA	1	NA	1	NA	1	NA	1	NA	0.743546	AM06253	FALSE	FALSE
3-16-2	4	AM06621;AM10457;AM02729;AM04401;	1	NA	1	NA	1	NA	1	NA	1	NA	1	NA	1	NA	1	NA	FALSE	FALSE
3-17-1	8	AM00533;AM01795;AM01938;AM04781;AM05780;AM05857;AM07134;AM08357;	0.498199	AM01795;AM05857	0.204377	AM00533;AM07134	1	NA	1	NA	1	NA	0.0734958	AM01795;AM01938	1	NA	0.602982	AM01795;AM01938	FALSE	FALSE
3-18-1	6	AM02097;AM00445R;AM02285;AM01442;AM08818;AM11983;	0.345872	AM00445R;AM02285	0.488954	AM11983	0.339627	AM08818	1	NA	1	NA	0.299304	AM08818	0.654169	AM02097	0.0316954	AM02097;AM02285;AM01442;AM11983	FALSE	FALSE
3-18-2	3	AM02062;AM03769;AM09670;	1	NA	0.285096	AM09670	1	NA	1	NA	1	NA	1	NA	0.0703402	AM02062;AM09670	0.143201	AM03769;AM09670	FALSE	FALSE
3-19-1	5	AM06332;AM09431;AM03179;AM10160;AM11802;	0.673407	AM06332	1	NA	0.29233	AM03179	1	NA	1	NA	1	NA	0.187578	AM06332;AM10160	1	NA	FALSE	FALSE
3-20-1	5	AM08591;AM00562;AM03780;AM07122;AM07341;	0.0582705	AM08591;AM03780;AM07122	0.428442	AM00562	1	NA	1	NA	1	NA	1	NA	0.187578	AM00562;AM07122	0.0914568	AM08591;AM00562;AM07341	FALSE	FALSE
3-21-1	3	AM04652;AM08312;AM02757;	0.488991	AM02757	0.285096	AM02757	1	NA	1	NA	1	NA	0.162906	AM04652	1	NA	1	NA	FALSE	FALSE
3-22-1	4	AM07460;AM09869;AM03342;AM05353;	0.181547	AM07460;AM09869	0.0580681	AM07460;AM03342	1	NA	1	NA	1	NA	1	NA	0.0149675	AM07460;AM09869;AM05353	0.242007	AM03342;AM05353	FALSE	FALSE
3-24-1	3	AM09084;AM09856;AM05315;	1	NA	1	NA	1	NA	1	NA	1	NA	1	NA	1	NA	0.557986	AM05315	FALSE	FALSE
3-25-1	5	AM12371;AM03279;AM05423;AM10981;AM11084;	0.263731	AM12371;AM10981	0.0900902	AM10981;AM11084	1	NA	1	NA	1	NA	1	NA	0.587203	AM03279	0.743546	AM12371	FALSE	FALSE
3-26-1	3	AM02239;AM05401;AM08514;	0.00805296	AM02239;AM05401;AM08514	0.0312127	AM02239;AM05401	0.187347	AM05401	1	NA	1	NA	0.162906	AM08514	0.411887	AM02239	0.557986	AM05401	TRUE	TURE
3-27-1	3	AM06491;AM11896;AM12230;	1	NA	1	NA	1	NA	1	NA	1	NA	1	NA	1	NA	0.557986	AM12230	FALSE	FALSE
4-1-1	12	AM00478;AM03149;AM08349;AM08836;AM04262;AM05562;AM08187;AM08299;AM09003;AM07941;AM09257;AM10092;	0.0195896	AM03149;AM04262;AM05562;AM09003;AM09257;AM10092	1	NA	1	NA	1	NA	1	NA	0.0282603	AM05562;AM08187;AM09003	0.602555	AM00478;AM09003	0.0437742	AM03149;AM08836;AM08299;AM09003;AM07941;AM09257	TRUE	TURE
4-1-2	3	AM09786;AM02752;AM09622;	0.10446	AM09786;AM09622	1	NA	1	NA	1	NA	1	NA	1	NA	0.411887	AM09786	1	NA	FALSE	FALSE
4-2-1	9	AM02846;AM10759;AM05879;AM11471;AM03187;AM04402;AM08301;AM09789;AM07161;	0.263088	AM02846;AM10759;AM09789	0.245336	AM02846;AM07161	0.463398	AM10759	1	NA	0.171263	AM09789	0.0909872	AM04402;AM08301	1	NA	0.144366	AM03187;AM08301;AM09789;AM07161	FALSE	FALSE
4-3-1	23	AM06376;AM10826;AM01980;AM02945;AM05029;AM05941;AM09141;AM09918;AM10584;AM11505;AM12435;AM04908;AM09677;AM10505;AM07462;AM12550;AM03064;AM03188;AM11715;AM02809;AM08833;AM09243;AM12013;	0.00253063	AM10826;AM01980;AM05941;AM09141;AM09918;AM11505;AM04908;AM09677;AM03064;AM08833;AM09243	0.445495	AM12435;AM10505;AM09243	0.796422	AM09243	1	NA	1	NA	0.00880509	AM10826;AM01980;AM10584;AM12435;AM04908	0.982976	AM09677	0.671365	AM10826;AM01980;AM05941;AM04908;AM09243	TRUE	TURE
4-3-2	3	AM04009;AM10055;AM12717;	1	NA	0.285096	AM04009	1	NA	1	NA	1	NA	1	NA	0.411887	AM04009	0.557986	AM12717	FALSE	FALSE
4-4-1	9	AM07071;AM12789;AM02188;AM05280;AM08041;AM10099;AM04748;AM07804;AM08062;	1	NA	0.63471	AM12789	0.463398	AM08041	1	NA	1	NA	1	NA	1	NA	0.36636	AM05280;AM04748;AM08062	FALSE	FALSE
4-4-2	4	AM08134;AM07687;AM11041;AM12152;	0.591472	AM08134	1	NA	0.241651	AM11041	1	NA	1	NA	1	NA	0.507278	AM08134	1	NA	FALSE	FALSE
4-5-1	12	AM04138;AM04312;AM08026;AM08224;AM08661;AM11127;AM06457;AM07384;AM08571;AM12420;AM08282;AM12352;	0.0039448	AM04138;AM04312;AM08224;AM08661;AM08571;AM12420;AM08282	0.738916	AM08661	1	NA	1	NA	1	NA	0.149099	AM04312;AM08661	0.115664	AM04138;AM08661;AM07384;AM08571	0.572126	AM04312;AM12420;AM08282	TRUE	TURE
4-6-1	9	AM00425;AM02786;AM02879;AM06460;AM07459;AM07546;AM09050;AM10485;AM12278;	0.866628	AM09050	0.245336	AM02786;AM02879	1	NA	1	NA	1	NA	0.0909872	AM02786;AM06460	0.167755	AM06460;AM07459;AM12278	0.913696	AM06460	FALSE	FALSE
4-7-1	8	AM02214;AM05236;AM07380;AM07448;AM08378;AM09086;AM11401;AM11982;	0.498199	AM02214;AM09086	0.204377	AM05236;AM09086	1	NA	1	NA	1	NA	0.0734958	AM08378;AM09086	0.0278819	AM05236;AM07448;AM09086;AM11401	0.292362	AM07380;AM08378;AM11982	FALSE	FALSE
4-8-1	6	AM06914;AM04586;AM09380;AM12602;AM06709;AM10168;	0.00161492	AM06914;AM04586;AM09380;AM12602;AM06709	0.488954	AM06914	1	NA	1	NA	0.117698	AM06914	0.0424926	AM06914;AM09380	0.00784828	AM06914;AM04586;AM09380;AM12602	0.437952	AM12602;AM10168	TRUE	TURE
4-9-1	8	AM04003;AM06805;AM07506;AM09268;AM10982;AM12096;AM06381;AM07566;	0.498199	AM04003;AM07506	0.591446	AM07566	0.424957	AM10982	1	NA	1	NA	1	NA	1	NA	0.602982	AM06805;AM12096	FALSE	FALSE
4-10-1	5	AM00495;AM05008;AM09555;AM03021;AM05954;	0.673407	AM00495	0.428442	AM03021	1	NA	1	NA	1	NA	1	NA	0.187578	AM00495;AM05954	0.743546	AM05954	FALSE	FALSE
4-11-1	7	AM04565;AM06267;AM07262;AM08347;AM09521;AM12050;AM04290;	0.0047146	AM04565;AM07262;AM08347;AM09521;AM04290	0.543062	AM04565	1	NA	1	NA	1	NA	1	NA	0.710275	AM08347	0.525327	AM07262;AM12050	TRUE	TURE
4-12-1	12	AM01206;AM02989;AM03006;AM03301;AM03420;AM05359;AM06486;AM09422;AM11253;AM12870R;AM07079;AM10730;	0.206684	AM01206;AM03420;AM07079;AM10730	0.738916	AM10730	1	NA	1	NA	0.221587	AM03420	0.0282603	AM01206;AM02989;AM06486	0.306588	AM03420;AM12870R;AM07079	0.315068	AM03006;AM03301;AM03420;AM12870R	FALSE	FALSE
4-13-1	3	AM04083;AM08600;AM08435;	0.488991	AM08435	0.0312127	AM04083;AM08435	1	NA	1	NA	1	NA	1	NA	1	NA	0.557986	AM04083	TRUE	TURE
4-14-1	5	AM07573;AM08477;AM03383;AM07619;AM03715;	0.263731	AM07573;AM08477	1	NA	1	NA	1	NA	1	NA	1	NA	0.187578	AM07573;AM03383	0.743546	AM08477	FALSE	FALSE
4-14-2	3	AM10874;AM12528;AM12649;	0.488991	AM10874	1	NA	1	NA	1	NA	1	NA	1	NA	1	NA	1	NA	FALSE	FALSE
4-15-1	6	AM02980;AM05947;AM10373;AM03137;AM02912;AM03495;	1	NA	0.488954	AM03137	0.339627	AM10373	1	NA	1	NA	1	NA	0.654169	AM10373	0.151218	AM02980;AM05947;AM03495	FALSE	FALSE
4-16-1	5	AM12083;AM12136;AM02309;AM04562;AM01774;	0.263731	AM12083;AM12136	1	NA	1	NA	1	NA	1	NA	0.256502	AM12136	0.587203	AM04562	0.743546	AM01774	FALSE	FALSE
4-17-1	8	AM02616;AM06468;AM07437;AM10032;AM10754;AM11048;AM12297;AM05800;	0.498199	AM02616;AM05800	0.591446	AM07437	0.424957	AM10754	1	NA	1	NA	1	NA	0.757283	AM10032	0.886684	AM06468	FALSE	FALSE
4-18-1	5	AM03157;AM06283;AM10278;AM11093;AM04747;	1	NA	0.0900902	AM11093;AM04747	1	NA	1	NA	1	NA	1	NA	1	NA	0.342374	AM03157;AM11093	FALSE	FALSE
4-19-1	5	AM04287;AM05013;AM10437;AM11512;AM12205;	0.263731	AM04287;AM11512	1	NA	1	NA	1	NA	1	NA	1	NA	1	NA	1	NA	FALSE	FALSE
4-20-1	6	AM07962;AM11325;AM01565;AM05064;AM09863;AM10865;	0.345872	AM05064;AM10865	1	NA	0.339627	AM09863	1	NA	1	NA	1	NA	0.654169	AM10865	0.151218	AM11325;AM09863;AM10865	FALSE	FALSE
4-21-1	5	AM10428;AM01597;AM06029;AM10127;AM11840;	0.673407	AM11840	1	NA	1	NA	1	NA	1	NA	1	NA	0.0329148	AM01597;AM06029;AM10127	0.342374	AM01597;AM06029	FALSE	FALSE
4-22-1	7	AM05712;AM07483;AM07649;AM11288;AM03323;AM04640;AM07544;	0.791286	AM03323	0.543062	AM03323	1	NA	1	NA	1	NA	1	NA	0.710275	AM11288	0.0601554	AM05712;AM07483;AM07649;AM03323	FALSE	FALSE
4-23-1	4	AM04123;AM12564;AM04977;AM12615;	0.181547	AM04123;AM12615	0.360772	AM04977	0.241651	AM04123	1	NA	1	NA	1	NA	0.507278	AM04123	0.663312	AM04123	FALSE	FALSE
4-24-1	6	AM12366;AM02816;AM03664;AM04234;AM06235;AM07979;	0.738914	AM04234	1	NA	1	NA	1	NA	1	NA	1	NA	1	NA	0.804665	AM04234	FALSE	FALSE
4-25-1	5	AM04552;AM10365;AM04940;AM08149;AM12910;	0.0582705	AM04552;AM10365;AM08149	0.428442	AM04940	1	NA	1	NA	1	NA	1	NA	0.187578	AM10365;AM12910	0.0914568	AM04552;AM10365;AM08149	FALSE	FALSE
4-26-1	6	AM05558;AM09165;AM11206;AM04020;AM09382;AM10215;	0.738914	AM09382	1	NA	1	NA	1	NA	1	NA	1	NA	1	NA	0.804665	AM09382	FALSE	FALSE
4-27-1	5	AM03476;AM06176;AM05165;AM06848;AM05602;	0.673407	AM03476	0.428442	AM05165	0.29233	AM06848	1	NA	1	NA	1	NA	1	NA	0.0914568	AM03476;AM06176;AM05165	FALSE	FALSE
4-27-2	3	AM04148;AM06825;AM07575;	0.488991	AM06825	1	NA	1	NA	1	NA	1	NA	1	NA	1	NA	1	NA	FALSE	FALSE
4-28-1	5	AM03237;AM04818;AM05003;AM06903;AM09716;	0.673407	AM04818	1	NA	1	NA	1	NA	0.0990867	AM04818	0.256502	AM06903	0.187578	AM04818;AM05003	0.0914568	AM04818;AM06903;AM09716	FALSE	FALSE
4-29-1	4	AM02905;AM09798;AM12336;AM10352;	0.0273724	AM02905;AM12336;AM10352	0.360772	AM02905	1	NA	1	NA	1	NA	1	NA	1	NA	0.242007	AM02905;AM10352	TRUE	TURE
4-30-1	4	AM05114;AM08882;AM10195;AM02805;	0.591472	AM05114	1	NA	1	NA	1	NA	1	NA	1	NA	0.125713	AM05114;AM02805	0.663312	AM02805	FALSE	FALSE
4-31-1	4	AM09559;AM06297;AM09030;AM09888;	0.181547	AM06297;AM09888	1	NA	1	NA	1	NA	1	NA	1	NA	1	NA	0.663312	AM06297	FALSE	FALSE
5-1-1	64	AM01510;AM02553;AM03139;AM03869;AM04360;AM04409;AM07530;AM07931;AM08273;AM08907;AM09861;AM12207;AM03577;AM04130;AM04895;AM05063;AM05392;AM10221;AM11510;AM02632;AM03590;AM07733;AM08875;AM04188;AM09494;AM10569;AM10656;AM11719;AM01465;AM04286;AM08766;AM04515;AM04829;AM05338;AM05797;AM06887;AM09142;AM10083;AM11208;AM11299;AM12387;AM04593;AM07825;AM08728;AM04596;AM05488;AM08408;AM05249;AM06740;AM08023…	0.0224445	AM01510;AM04409;AM07530;AM07931;AM03577;AM04895;AM11510;AM02632;AM03590;AM07733;AM04829;AM09142;AM11299;AM12387;AM05249;AM07344;AM07791;AM10980;AM03048;AM08275	0.0152377	AM04409;AM07530;AM07931;AM03577;AM05063;AM10221;AM07733;AM09494;AM05797;AM05488;AM08023;AM08275;AM10397	0.627027	AM03139;AM12207;AM08408;AM07791	1	NA	1	NA	0.506854	AM02553;AM09861;AM12387;AM10980	3.15038e-05	AM02553;AM07530;AM07931;AM12207;AM05392;AM11510;AM03590;AM07733;AM04188;AM09494;AM10569;AM11719;AM01465;AM04515;AM11208;AM12387;AM08408;AM06740;AM08023;AM11053;AM12024;AM07791;AM06921;AM10576	4.55248e-05	AM01510;AM02553;AM04409;AM08273;AM03577;AM04130;AM10221;AM08875;AM09494;AM01465;AM04515;AM05797;AM06887;AM09142;AM10083;AM11299;AM04593;AM07825;AM08728;AM05488;AM06740;AM08023;AM09946;AM11053;AM12024;AM12530;AM07791;AM10980;AM06921;AM08275	TRUE	TURE
5-1-2	8	AM11979;AM07939;AM08391;AM12628;AM01325;AM10330;AM05898;AM09196;	0.833156	AM10330	0.591446	AM07939	1	NA	1	NA	1	NA	0.377666	AM07939	0.381223	AM12628;AM05898	0.0222068	AM07939;AM12628;AM01325;AM10330;AM09196	FALSE	FALSE
5-1-3	8	AM01329;AM06362;AM11540;AM11743;AM08372;AM02880;AM11676;AM11685;	0.010499	AM06362;AM11743;AM08372;AM02880;AM11676	0.591446	AM11676	0.424957	AM02880	1	NA	1	NA	1	NA	0.126454	AM01329;AM11540;AM08372	0.000274507	AM01329;AM06362;AM11540;AM11743;AM08372;AM02880;AM11676	TRUE	TURE
5-2-1	13	AM01815;AM00743R;AM08593;AM00020R;AM03915;AM05851;AM03943;AM07955;AM09046;AM11277;AM09108;AM01724;AM03587;	1	NA	1	NA	0.593148	AM09108	1	NA	1	NA	0.169808	AM08593;AM01724	0.0460365	AM08593;AM03943;AM09046;AM09108;AM01724	1	NA	FALSE	FALSE
5-2-2	10	AM06447;AM10081;AM02760;AM03537;AM05228;AM02270;AM11921;AM07449;AM03575;AM01660;	0.893388	AM03575	0.286542	AM03575;AM01660	0.499272	AM03575	1	NA	1	NA	1	NA	0.499706	AM03537;AM07449	0.197238	AM06447;AM05228;AM11921;AM01660	FALSE	FALSE
5-2-3	5	AM04425;AM01298;AM05030;AM01883;AM09186;	1	NA	1	NA	1	NA	1	NA	1	NA	1	NA	0.587203	AM01298	0.743546	AM05030	FALSE	FALSE
5-2-4	4	AM04798;AM06755;AM07116;AM06830;	1	NA	0.360772	AM06830	1	NA	1	NA	1	NA	0.211089	AM06830	1	NA	1	NA	FALSE	FALSE
5-2-5	3	AM09637;AM03232;AM10825;	1	NA	0.285096	AM10825	1	NA	1	NA	1	NA	1	NA	1	NA	1	NA	FALSE	FALSE
5-3-1	30	AM09663;AM10329;AM02744;AM09459;AM10163;AM00101;AM05589;AM01618;AM07778;AM08126;AM08213;AM08868;AM10337;AM10712;AM12259;AM05262;AM05690;AM06426;AM10102;AM10411;AM10602;AM11415;AM02801;AM05878;AM07489;AM09707;AM10944;AM07663;AM11059;AM11678;	0.0259208	AM09663;AM09459;AM05589;AM01618;AM10337;AM10712;AM05690;AM10411;AM02801;AM07489;AM07663	0.393933	AM09459;AM08213;AM10102;AM11415	0.874658	AM02744	1	NA	1	NA	0.831374	AM08213	0.0432517	AM09459;AM01618;AM07778;AM08868;AM10337;AM05262;AM06426;AM10411;AM02801	0.00514272	AM09663;AM09459;AM00101;AM05589;AM08213;AM10712;AM05262;AM05690;AM06426;AM10602;AM02801;AM09707;AM07663;AM11059	TRUE	TURE
5-3-2	6	AM08684;AM01176;AM06822;AM06290;AM12017;AM10033;	0.345872	AM06290;AM12017	0.125886	AM08684;AM06290	1	NA	1	NA	1	NA	1	NA	0.0579814	AM08684;AM06822;AM12017	0.151218	AM06822;AM06290;AM12017	FALSE	FALSE
5-3-3	3	AM07535;AM04891;AM10704;	1	NA	0.285096	AM10704	1	NA	1	NA	0.0606837	AM04891	1	NA	0.411887	AM04891	0.557986	AM07535	FALSE	FALSE
5-4-1	13	AM02674;AM02797;AM03907;AM04979;AM05913;AM05983;AM06109;AM06375;AM06427;AM09390;AM10524;AM11063;AM11099;	0.0998932	AM05913;AM05983;AM06109;AM10524;AM11063	0.766572	AM09390	1	NA	1	NA	0.237676	AM06109	0.537381	AM05983	0.146609	AM04979;AM06427;AM09390;AM10524	0.0653057	AM02674;AM02797;AM05913;AM05983;AM06427;AM10524	FALSE	FALSE
5-5-1	14	AM01607;AM03551;AM03919;AM04674;AM04976;AM08466;AM12119;AM11721;AM12415;AM12746;AM02360;AM02790;AM06009;AM07366;	0.303483	AM03551;AM03919;AM12415;AM02360	0.178691	AM12119;AM11721;AM07366	1	NA	1	NA	1	NA	1	NA	0.0034818	AM01607;AM03919;AM04976;AM08466;AM12746;AM02360;AM06009	0.00148337	AM01607;AM03551;AM03919;AM04674;AM04976;AM08466;AM12119;AM11721;AM12415	FALSE	FALSE
5-6-1	8	AM05337;AM12487;AM08013;AM11457;AM12176;AM07078;AM04689;AM10455;	1	NA	1	NA	1	NA	1	NA	1	NA	1	NA	1	NA	0.886684	AM07078	FALSE	FALSE
5-7-1	9	AM03214;AM03294;AM08554;AM09233;AM00093;AM03257;AM06449;AM11932;AM12288;	0.866628	AM12288	0.63471	AM00093	1	NA	1	NA	1	NA	0.4135	AM06449	0.442215	AM08554;AM12288	0.670589	AM00093;AM12288	FALSE	FALSE
5-8-1	7	AM02916;AM11758;AM01521;AM00287;AM00482R;AM00474R;AM00834;	1	NA	1	NA	1	NA	1	NA	1	NA	1	NA	1	NA	1	NA	FALSE	FALSE
5-8-2	3	AM00915;AM00990;AM02432;	1	NA	0.285096	AM02432	1	NA	1	NA	1	NA	1	NA	0.411887	AM02432	1	NA	FALSE	FALSE
5-9-1	8	AM05016;AM06804;AM07340;AM10938;AM11054;AM05004;AM06843;AM07007;	0.498199	AM11054;AM07007	0.204377	AM06804;AM07007	0.424957	AM05004	1	NA	1	NA	1	NA	0.126454	AM06804;AM07340;AM07007	0.0981039	AM06804;AM07340;AM10938;AM11054	FALSE	FALSE
5-9-2	3	AM06553;AM11766;AM10119;	0.10446	AM11766;AM10119	0.285096	AM10119	1	NA	1	NA	1	NA	1	NA	0.411887	AM11766	0.143201	AM06553;AM11766	FALSE	FALSE
5-10-1	5	AM08935;AM00807R;AM08646;AM02384;AM09935;	1	NA	1	NA	0.0389331	AM08935;AM09935	1	NA	1	NA	1	NA	0.187578	AM08935;AM08646	1	NA	FALSE	FALSE
5-11-1	8	AM04180;AM07169;AM02656;AM03479;AM04706;AM04851;AM06938;AM10085;	0.00124395	AM04180;AM02656;AM03479;AM04706;AM06938;AM10085	1	NA	0.424957	AM04851	1	NA	1	NA	0.377666	AM03479	0.126454	AM03479;AM04706;AM04851	0.0981039	AM07169;AM03479;AM04851;AM10085	TRUE	TURE
5-12-1	3	AM01407;AM01657;AM01932;	0.488991	AM01657	1	NA	1	NA	1	NA	1	NA	1	NA	0.411887	AM01657	0.143201	AM01657;AM01932	FALSE	FALSE
5-12-2	3	AM03806;AM07918;AM06423;	1	NA	1	NA	1	NA	1	NA	1	NA	1	NA	1	NA	0.557986	AM07918	FALSE	FALSE
5-13-1	9	AM00998;AM05206;AM05818;AM05834;AM06463;AM07552;AM08999;AM09324;AM09826;	0.0862348	AM05818;AM05834;AM07552;AM09826	0.245336	AM07552;AM09826	1	NA	1	NA	1	NA	1	NA	0.0438539	AM05206;AM05818;AM07552;AM08999	0.000979276	AM05206;AM05818;AM06463;AM07552;AM08999;AM09324;AM09826	FALSE	FALSE
5-14-1	3	AM03506;AM03208;AM07880;	0.488991	AM03208	1	NA	1	NA	1	NA	1	NA	1	NA	1	NA	0.143201	AM03208;AM07880	FALSE	FALSE
5-15-1	6	AM02434;AM02601;AM03636;AM06265;AM11937;AM01859;	0.345872	AM03636;AM11937	0.125886	AM06265;AM11937	1	NA	1	NA	1	NA	0.299304	AM01859	0.654169	AM02434	0.151218	AM02434;AM02601;AM01859	FALSE	FALSE
5-16-1	5	AM02850;AM04650;AM07255;AM10585;AM02982;	0.263731	AM04650;AM07255	0.428442	AM02850	1	NA	1	NA	0.0990867	AM04650	1	NA	0.187578	AM04650;AM10585	0.743546	AM02850	FALSE	FALSE
5-17-1	3	AM02678;AM04266;AM01911;	1	NA	1	NA	1	NA	1	NA	1	NA	1	NA	1	NA	1	NA	FALSE	FALSE
5-18-1	3	AM04081;AM10325;AM11215;	1	NA	1	NA	1	NA	1	NA	1	NA	1	NA	0.411887	AM04081	1	NA	FALSE	FALSE
5-19-1	5	AM04592;AM05095;AM11256;AM08385;AM11928;	1	NA	0.428442	AM11256	1	NA	1	NA	1	NA	1	NA	0.187578	AM11256;AM08385	0.743546	AM11928	FALSE	FALSE
5-20-1	3	AM07305;AM09581;AM10124;	0.10446	AM07305;AM09581	0.285096	AM09581	1	NA	1	NA	1	NA	1	NA	0.411887	AM07305	1	NA	FALSE	FALSE
5-21-1	4	AM00119;AM03462;AM08683;AM00433;	0.591472	AM00433	1	NA	0.0244332	AM03462;AM08683	1	NA	1	NA	0.211089	AM08683	1	NA	1	NA	FALSE	FALSE
6-1-1	38	AM03744;AM04260;AM05927;AM05932;AM06199;AM06542;AM06568;AM07464;AM10047;AM11026;AM11462;AM11603;AM02551;AM03162;AM05537;AM08291;AM09522;AM12454;AM02892;AM03680;AM03968;AM08081;AM10051;AM03768;AM04743;AM06146;AM06183;AM07622;AM08861;AM08866;AM03884;AM07493;AM08777;AM09024;AM05000;AM07775;AM07607;AM11448;	0.0630456	AM03744;AM07464;AM10047;AM03162;AM03680;AM10051;AM06146;AM08866;AM03884;AM07493;AM07607;AM11448	0.921929	AM06542;AM07607	0.928017	AM07775	1	NA	1	NA	0.375221	AM10047;AM10051;AM11448	0.760559	AM06542;AM07464;AM11603;AM09522;AM07607	0.419718	AM06568;AM10047;AM11026;AM02551;AM08291;AM03680;AM08081;AM10051;AM07493;AM08777	FALSE	FALSE
6-1-2	7	AM10471;AM09045;AM03850;AM07150;AM08952;AM09214;AM11036;	0.0335928	AM10471;AM09045;AM07150;AM09214	0.543062	AM11036	1	NA	1	NA	1	NA	1	NA	1	NA	0.0103505	AM10471;AM09045;AM08952;AM09214;AM11036	TRUE	TURE
6-1-3	3	AM10901;AM05785;AM06693;	1	NA	0.285096	AM05785	1	NA	1	NA	1	NA	0.162906	AM05785	1	NA	0.143201	AM05785;AM06693	FALSE	FALSE
6-2-1	17	AM03394;AM04077;AM06036;AM07754;AM03375;AM05869;AM05376;AM07074;AM08159;AM09541;AM09823;AM03584;AM09420;AM10967;AM05386;AM10454;AM11711;	0.692336	AM04077;AM05386;AM10454	0.850856	AM05386	1	NA	1	NA	1	NA	0.635123	AM04077	0.78825	AM04077;AM10454	0.0863007	AM03394;AM06036;AM07074;AM09823;AM10967;AM05386;AM11711	FALSE	FALSE
6-2-2	4	AM05891;AM07596;AM10121;AM05946;	1	NA	1	NA	1	NA	1	NA	1	NA	1	NA	1	NA	0.663312	AM07596	FALSE	FALSE
6-3-1	11	AM01825;AM04363;AM05682;AM06445;AM06898;AM10206;AM11137;AM12853;AM07111;AM10678;AM11792;	0.0508227	AM04363;AM06898;AM10206;AM11137;AM07111	0.707986	AM12853	1	NA	1	NA	1	NA	1	NA	0.857305	AM01825	0.0272913	AM01825;AM04363;AM06445;AM06898;AM12853;AM10678	FALSE	FALSE
6-4-1	11	AM02203;AM04512;AM04936;AM05306;AM06530;AM08885;AM09270;AM10266;AM11554;AM01284;AM04306;	0.679467	AM02203;AM05306	0.707986	AM05306	1	NA	1	NA	1	NA	1	NA	1	NA	0.0965321	AM02203;AM09270;AM11554;AM01284;AM04306	FALSE	FALSE
6-5-1	7	AM11113;AM12369;AM01782;AM02815;AM11725;AM04739;AM09192;	0.148843	AM12369;AM02815;AM11725	0.543062	AM02815	1	NA	1	NA	1	NA	0.339644	AM11725	0.710275	AM02815	0.0601554	AM01782;AM02815;AM11725;AM09192	FALSE	FALSE
6-5-2	3	AM11771;AM04494;AM07670;	0.00805296	AM11771;AM04494;AM07670	0.285096	AM11771	1	NA	1	NA	1	NA	1	NA	0.00425929	AM11771;AM04494;AM07670	0.557986	AM07670	TRUE	TURE
6-6-1	9	AM00646;AM08835;AM10854;AM00216;AM00713R;AM11748;AM00588;AM10217;AM10327;	1	NA	0.63471	AM00646	0.463398	AM11748	1	NA	1	NA	1	NA	1	NA	1	NA	FALSE	FALSE
6-6-2	7	AM03809;AM05661;AM01751;AM00847;AM03847;AM06837;AM11519;	0.791286	AM05661	0.543062	AM00847	0.383765	AM03809	1	NA	0.135925	AM05661	1	NA	1	NA	1	NA	FALSE	FALSE
6-6-3	5	AM01063;AM12456;AM02613;AM03054;AM10509;	0.673407	AM10509	1	NA	1	NA	1	NA	1	NA	1	NA	1	NA	0.342374	AM01063;AM02613	FALSE	FALSE
6-6-4	4	AM01754;AM00461;AM02651;AM11828;	0.591472	AM02651	0.360772	AM02651	1	NA	1	NA	1	NA	1	NA	1	NA	1	NA	FALSE	FALSE
6-6-5	3	AM06927;AM02319;AM11620;	1	NA	0.285096	AM11620	1	NA	1	NA	1	NA	1	NA	1	NA	0.143201	AM06927;AM02319	FALSE	FALSE
6-7-1	6	AM02758;AM03828;AM05235;AM05715;AM02350;AM09164;	1	NA	1	NA	1	NA	1	NA	1	NA	0.299304	AM05235	1	NA	0.437952	AM05715;AM02350	FALSE	FALSE
6-8-1	6	AM03906;AM05709;AM06282;AM09671;AM10044;AM11244;	0.738914	AM11244	1	NA	1	NA	1	NA	1	NA	0.299304	AM03906	0.0579814	AM09671;AM10044;AM11244	0.151218	AM03906;AM09671;AM10044	FALSE	FALSE
6-9-1	7	AM03923;AM06798;AM07984;AM09728;AM10024;AM11384;AM11680;	1	NA	0.543062	AM10024	0.383765	AM11384	1	NA	1	NA	0.0572583	AM03923;AM10024	1	NA	0.525327	AM09728;AM11384	FALSE	FALSE
6-10-1	7	AM03159;AM03984;AM08404;AM09028;AM12695;AM07302;AM09736;	0.0335928	AM03159;AM12695;AM07302;AM09736	0.543062	AM07302	0.383765	AM09736	1	NA	1	NA	1	NA	0.0894898	AM03984;AM09028;AM09736	0.0601554	AM03984;AM08404;AM07302;AM09736	TRUE	TURE
6-11-1	9	AM03310;AM06466;AM07181;AM08034;AM08257;AM09104;AM09250;AM10528;AM11762;	0.565373	AM06466;AM09250	1	NA	1	NA	1	NA	1	NA	0.012276	AM07181;AM08257;AM11762	1	NA	0.36636	AM03310;AM06466;AM08257	FALSE	FALSE
6-12-1	6	AM01358;AM00497;AM00717;AM02114;AM12845;AM00543;	0.09945	AM00717;AM12845;AM00543	0.125886	AM00497;AM00717	1	NA	1	NA	1	NA	1	NA	0.654169	AM12845	0.00368232	AM01358;AM00717;AM02114;AM12845;AM00543	FALSE	FALSE
6-13-1	7	AM06641;AM08973;AM09049;AM10920;AM01790;AM05243;AM06485;	1	NA	1	NA	1	NA	1	NA	1	NA	1	NA	1	NA	0.525327	AM10920;AM01790	FALSE	FALSE
6-14-1	4	AM01987;AM04434;AM06074;AM02561;	0.0273724	AM04434;AM06074;AM02561	0.0580681	AM04434;AM06074	1	NA	1	NA	1	NA	0.211089	AM01987	0.0149675	AM04434;AM06074;AM02561	0.663312	AM02561	TRUE	TURE
6-15-1	7	AM03116;AM05296;AM06745;AM08513;AM09427;AM12187;AM12804;	0.791286	AM03116	0.543062	AM05296	1	NA	1	NA	1	NA	0.339644	AM03116	0.0159703	AM03116;AM05296;AM08513;AM12187	0.851222	AM06745	FALSE	FALSE
6-16-1	4	AM03497;AM04995;AM09536;AM04795;	0.591472	AM09536	0.360772	AM09536	1	NA	1	NA	1	NA	1	NA	0.507278	AM04795	1	NA	FALSE	FALSE
6-17-1	3	AM07751;AM07928;AM10023;	1	NA	1	NA	1	NA	1	NA	1	NA	1	NA	1	NA	0.143201	AM07751;AM07928	FALSE	FALSE
6-18-1	5	AM01767;AM04772;AM04883;AM11442;AM07031;	1	NA	1	NA	0.29233	AM11442	1	NA	1	NA	1	NA	1	NA	0.0914568	AM01767;AM04772;AM11442	FALSE	FALSE
6-19-1	6	AM05580;AM08154;AM08705;AM10983;AM12238;AM12651;	1	NA	0.488954	AM12651	1	NA	1	NA	1	NA	0.299304	AM05580	1	NA	0.437952	AM05580;AM12651	FALSE	FALSE
6-20-1	5	AM03195;AM05563;AM10573;AM12183;AM09655;	0.0582705	AM03195;AM05563;AM10573	1	NA	1	NA	1	NA	1	NA	1	NA	0.587203	AM03195	0.342374	AM05563;AM10573	FALSE	FALSE
6-21-1	5	AM02769;AM03401;AM04839;AM06019;AM10995;	1	NA	0.428442	AM02769	1	NA	1	NA	1	NA	1	NA	0.587203	AM02769	0.743546	AM02769	FALSE	FALSE
6-22-1	5	AM03837;AM03865;AM04866;AM06558;AM11734;	1	NA	1	NA	1	NA	1	NA	1	NA	1	NA	1	NA	1	NA	FALSE	FALSE
7-1-1	53	AM01485;AM00660;AM00307;AM01268;AM01719;AM00767R;AM00818;AM00582;AM00624R;AM01681;AM02094;AM05813;AM06486R;AM12800;AM00295;AM11915;AM12250;AM00367R;AM00525R;AM00643;AM00711R;AM00723R;AM00806;AM00935R;AM02349;AM02787;AM05506;AM09087;AM09198;AM00181;AM03677;AM00381;AM00790R;AM00811R;AM01626;AM01269;AM01533;AM07001;AM01912;AM06488R;AM05077;AM06489;AM07107;AM00301;AM02116;AM03206;AM03704;AM11665;AM12…	1	NA	0.980803	AM00582;AM11655	0.476366	AM00307;AM12800;AM05506;AM09198	1	NA	1	NA	1	NA	0.980483	AM01485;AM05813;AM00367R;AM03704	0.957321	AM01485;AM01681;AM05813;AM00295;AM09087;AM09198;AM07001;AM02116	FALSE	FALSE
7-1-2	10	AM00788;AM00819;AM01640;AM07315;AM01906;AM02743;AM02470;AM06383;AM00681R;AM04679;	1	NA	0.286542	AM00788;AM01906	1	NA	1	NA	1	NA	0.447274	AM02470	1	NA	0.197238	AM01906;AM02743;AM02470;AM04679	FALSE	FALSE
7-1-3	9	AM02212;AM02399;AM00600;AM01470;AM07212;AM01598;AM01620;AM02145;AM02509;	1	NA	0.63471	AM02509	1	NA	1	NA	1	NA	0.4135	AM02399	0.796666	AM02399	0.144366	AM02399;AM07212;AM01598;AM01620	FALSE	FALSE
7-1-4	4	AM00417R;AM05581;AM03936;AM06547;	0.591472	AM00417R	1	NA	1	NA	1	NA	1	NA	1	NA	1	NA	0.242007	AM03936;AM06547	FALSE	FALSE
7-1-5	4	AM00938;AM10830;AM06851;AM12787;	1	NA	1	NA	0.241651	AM10830	1	NA	1	NA	1	NA	1	NA	0.663312	AM10830	FALSE	FALSE
7-1-6	4	AM12206;AM06559;AM01885;AM12171;	1	NA	0.0580681	AM06559;AM12171	1	NA	1	NA	1	NA	1	NA	1	NA	0.242007	AM12206;AM01885	FALSE	FALSE
7-2-1	19	AM02135;AM04034;AM05662;AM06129;AM00715R;AM00900R;AM01267;AM02423;AM05961;AM07507;AM00586;AM12690;AM04460;AM05216;AM03313;AM00312;AM06063;AM09515;AM09526;	0.918054	AM05662;AM06063	0.612307	AM02423;AM09526	0.034264	AM12690;AM04460;AM00312;AM09515	1	NA	1	NA	0.675962	AM02135	0.372023	AM05662;AM06129;AM01267;AM09515	0.0603963	AM04034;AM02423;AM05961;AM04460;AM05216;AM03313;AM06063;AM09526	FALSE	FALSE
7-2-2	7	AM02396;AM03501;AM04558;AM07473;AM03128;AM01212;AM01870;	0.791286	AM04558	0.543062	AM07473	1	NA	1	NA	1	NA	0.339644	AM03501	0.317531	AM03128;AM01212	0.525327	AM02396;AM01870	FALSE	FALSE
7-2-3	3	AM11942;AM01226;AM02002;	0.488991	AM01226	1	NA	1	NA	1	NA	1	NA	1	NA	1	NA	1	NA	FALSE	FALSE
7-3-1	32	AM01854;AM02289;AM03539;AM04505;AM01094;AM03296;AM04926;AM07287;AM12298;AM03117;AM10259;AM12501;AM03601;AM04415;AM05330;AM05590;AM12499;AM04614;AM11623;AM06440;AM07820;AM08207;AM07945;AM11066;AM03107;AM04609;AM12301;AM10264;AM09014;AM10949;AM05106;AM02385;	0.968913	AM05330;AM11623;AM12301	0.972235	AM11623	1	NA	1	NA	1	NA	0.850266	AM08207	0.610185	AM12501;AM05330;AM11623;AM06440;AM07945	0.668721	AM02289;AM01094;AM10259;AM04415;AM12499;AM12301;AM02385	FALSE	FALSE
7-3-2	7	AM07389;AM08989;AM12108;AM02535;AM01252;AM02456;AM03391;	0.0335928	AM08989;AM02535;AM01252;AM03391	1	NA	1	NA	1	NA	1	NA	1	NA	1	NA	0.219515	AM01252;AM02456;AM03391	TRUE	TURE
7-3-3	3	AM06663;AM06879;AM00633;	0.488991	AM00633	1	NA	1	NA	1	NA	1	NA	0.162906	AM06663	1	NA	0.143201	AM06663;AM00633	FALSE	FALSE
7-4-1	9	AM00657R;AM03360;AM06337;AM11829;AM00632R;AM07256;AM00189;AM04114;AM09944;	0.866628	AM07256	1	NA	0.463398	AM06337	1	NA	1	NA	1	NA	1	NA	0.913696	AM04114	FALSE	FALSE
7-4-2	4	AM02715;AM00024;AM00697;AM02606;	0.591472	AM02715	1	NA	1	NA	1	NA	1	NA	1	NA	0.507278	AM02606	0.663312	AM00024	FALSE	FALSE
7-5-1	5	AM07661;AM09889;AM11691;AM00468;AM01222;	0.673407	AM11691	1	NA	0.29233	AM09889	1	NA	1	NA	1	NA	0.587203	AM01222	0.743546	AM07661	FALSE	FALSE
7-6-1	11	AM00262;AM01158;AM01271;AM01908;AM00647;AM02750;AM01258;AM10851;AM00932R;AM00836;AM01492;	0.679467	AM02750;AM00836	1	NA	1	NA	1	NA	1	NA	1	NA	0.553227	AM01908;AM02750	0.507861	AM00647;AM02750;AM00836	FALSE	FALSE
7-6-2	3	AM00049R;AM11010;AM12885;	1	NA	1	NA	1	NA	1	NA	1	NA	1	NA	0.411887	AM12885	1	NA	FALSE	FALSE
7-7-1	8	AM00943R;AM01948;AM02527;AM03795;AM05883;AM10153;AM01256;AM00897;	0.833156	AM01948	1	NA	1	NA	1	NA	1	NA	1	NA	0.381223	AM02527;AM01256	0.292362	AM02527;AM05883;AM10153	FALSE	FALSE
7-8-1	11	AM03488;AM03644;AM10990;AM02957;AM04664;AM07409;AM04185;AM04750;AM10812;AM00542;AM02937;	0.162167	AM03488;AM02957;AM04664;AM00542	0.707986	AM03488	1	NA	1	NA	1	NA	1	NA	0.553227	AM02957;AM02937	0.777563	AM04664;AM02937	FALSE	FALSE
7-8-2	5	AM08440;AM11490;AM05365;AM08209;AM04826;	0.263731	AM08209;AM04826	1	NA	1	NA	0.0180909	AM04826	1	NA	1	NA	0.587203	AM04826	0.342374	AM11490;AM04826	FALSE	FALSE
7-9-1	7	AM01791;AM00642;AM01084;AM02069;AM07046;AM12723;AM12849;	1	NA	0.543062	AM12723	1	NA	1	NA	1	NA	1	NA	0.0017568	AM00642;AM01084;AM02069;AM07046;AM12723	0.851222	AM02069	FALSE	FALSE
7-10-1	4	AM00535R;AM08284;AM00436;AM09287;	1	NA	1	NA	1	NA	1	NA	1	NA	1	NA	1	NA	1	NA	FALSE	FALSE
7-11-1	5	AM00330;AM08908;AM00924R;AM02564;AM11533;	1	NA	1	NA	1	NA	1	NA	1	NA	1	NA	0.587203	AM00330	1	NA	FALSE	FALSE
7-12-1	3	AM01401;AM04017;AM01834;	1	NA	1	NA	1	NA	1	NA	1	NA	0.162906	AM01401	1	NA	0.557986	AM01834	FALSE	FALSE
7-13-1	3	AM00749R;AM03095;AM01700;	1	NA	1	NA	1	NA	1	NA	1	NA	1	NA	1	NA	0.557986	AM00749R	FALSE	FALSE
7-14-1	4	AM00524;AM03913;AM04756;AM07998;	0.181547	AM03913;AM07998	1	NA	1	NA	1	NA	1	NA	0.211089	AM07998	0.125713	AM03913;AM04756	0.663312	AM03913	FALSE	FALSE
7-16-1	5	AM00796R;AM03174;AM05687;AM09940;AM11219;	1	NA	1	NA	1	NA	1	NA	1	NA	1	NA	0.587203	AM11219	0.743546	AM00796R	FALSE	FALSE
8-1-1	13	AM01197;AM01548;AM01584;AM01800;AM01804;AM02102;AM01161;AM01785;AM02500;AM01047;AM01763;AM01946;AM01416;	0.254146	AM01548;AM01584;AM02102;AM01161	0.407046	AM01548;AM01785	1	NA	1	NA	1	NA	0.537381	AM01946	0.899866	AM01416	6.6095e-06	AM01197;AM01548;AM01584;AM01800;AM01804;AM02102;AM01161;AM01785;AM02500;AM01047;AM01416	FALSE	FALSE
8-1-2	4	AM01371;AM12902;AM01251;AM02176;	0.181547	AM12902;AM02176	1	NA	1	NA	1	NA	1	NA	0.211089	AM01251	1	NA	0.00321641	AM01371;AM12902;AM01251;AM02176	FALSE	FALSE
8-2-1	23	AM00395;AM00453;AM00603;AM00831;AM01348;AM01373;AM01758;AM01821;AM01895;AM02008;AM02146;AM02433;AM02455;AM02541;AM05614;AM07744;AM08176;AM10364;AM10513;AM10700;AM11305;AM12359;AM06399;	0.161198	AM00453;AM01821;AM02008;AM02146;AM02541;AM05614;AM07744	0.00176053	AM00395;AM01373;AM01758;AM02146;AM02541;AM10513;AM10700;AM11305	1	NA	1	NA	1	NA	0.384931	AM01821;AM01895	0.000400384	AM00395;AM00603;AM00831;AM01348;AM01758;AM01821;AM01895;AM02433;AM07744;AM08176;AM10364	2.90922e-05	AM00395;AM00453;AM00831;AM01348;AM01373;AM01758;AM01821;AM01895;AM02008;AM02146;AM02433;AM02455;AM05614;AM10513;AM06399	TRUE	TURE
8-3-1	8	AM00799;AM01031;AM01954;AM02099;AM03986;AM02152;AM05345;AM06890;	0.498199	AM03986;AM05345	0.591446	AM03986	0.424957	AM03986	1	NA	1	NA	1	NA	0.757283	AM01031	0.0222068	AM00799;AM02099;AM03986;AM02152;AM05345	FALSE	FALSE
8-4-1	9	AM00065;AM01369;AM01770;AM01865;AM02517;AM04295;AM07812;AM09801;AM02232;	0.0862348	AM00065;AM01770;AM01865;AM09801	0.0610195	AM01770;AM01865;AM07812	1	NA	1	NA	1	NA	0.0909872	AM01369;AM01770	0.442215	AM01770;AM07812	0.00775154	AM00065;AM01369;AM01770;AM01865;AM09801;AM02232	FALSE	FALSE
8-5-1	13	AM00452;AM01070;AM01290;AM01604;AM02425;AM02485;AM02586;AM02812;AM03330;AM06025;AM07144;AM12043;AM02216;	0.254146	AM00452;AM02485;AM02586;AM02216	0.766572	AM00452	1	NA	1	NA	1	NA	1	NA	0.146609	AM00452;AM02586;AM03330;AM02216	0.000671879	AM00452;AM01070;AM01290;AM01604;AM02425;AM02485;AM02586;AM12043;AM02216	FALSE	FALSE
8-6-1	6	AM01167;AM01411;AM01746;AM01753;AM02025;AM07932;	0.09945	AM01746;AM01753;AM07932	0.488954	AM01167	0.339627	AM07932	1	NA	1	NA	1	NA	1	NA	0.00368232	AM01411;AM01746;AM01753;AM02025;AM07932	FALSE	FALSE
8-7-1	4	AM01306;AM11487;AM01150;AM08841;	0.181547	AM01306;AM01150	1	NA	0.241651	AM11487	1	NA	1	NA	0.211089	AM11487	0.125713	AM01150;AM08841	0.0443947	AM01306;AM11487;AM08841	FALSE	FALSE
8-8-1	5	AM00382;AM01029;AM01313;AM10447;AM02301;	0.00677361	AM01029;AM01313;AM10447;AM02301	0.428442	AM00382	1	NA	1	NA	1	NA	0.0294382	AM01029;AM02301	0.0329148	AM01029;AM10447;AM02301	0.01302	AM01029;AM01313;AM10447;AM02301	TRUE	TURE
8-9-1	6	AM12833;AM12884;AM00837;AM01301;AM01539;AM06187;	0.00161492	AM12833;AM12884;AM00837;AM01301;AM01539	0.00157174	AM12833;AM12884;AM00837;AM06187	1	NA	1	NA	1	NA	0.0424926	AM01539;AM06187	0.252377	AM00837;AM06187	0.0316954	AM12833;AM12884;AM01301;AM01539	TRUE	TURE
8-10-1	6	AM01573;AM04267;AM05472;AM05884;AM12066;AM12580;	0.345872	AM01573;AM12066	0.125886	AM01573;AM12066	1	NA	1	NA	1	NA	1	NA	0.654169	AM01573	0.0316954	AM01573;AM04267;AM05884;AM12066	FALSE	FALSE
8-11-1	6	AM05592;AM06379;AM06498;AM08382;AM01332;AM08152;	1	NA	0.488954	AM08382	0.339627	AM05592	1	NA	1	NA	0.0424926	AM06379;AM01332	0.654169	AM05592	0.00368232	AM05592;AM06379;AM08382;AM01332;AM08152	FALSE	FALSE
8-12-1	7	AM05116;AM06894;AM08796;AM10374;AM11024;AM11117;AM12063;	0.424683	AM08796;AM12063	1	NA	0.383765	AM12063	1	NA	1	NA	0.0572583	AM10374;AM11117	1	NA	0.525327	AM06894;AM11117	FALSE	FALSE
8-13-1	4	AM01204;AM01631;AM02313;AM01755;	0.181547	AM02313;AM01755	1	NA	1	NA	1	NA	1	NA	1	NA	1	NA	0.242007	AM01631;AM02313	FALSE	FALSE
9-1-1	21	AM09855;AM03432;AM04103;AM05795;AM06675;AM02906;AM12661;AM05024;AM12088;AM05672;AM06809;AM03912;AM08174;AM03324;AM08589;AM06976;AM08470;AM12361;AM08476;AM09441;AM03944;	0.0145773	AM09855;AM02906;AM12661;AM12088;AM05672;AM08589;AM08476;AM09441;AM03944	0.386493	AM03432;AM04103;AM12088	1	NA	1	NA	1	NA	1	NA	0.450534	AM04103;AM02906;AM12661;AM03944	0.907478	AM03912;AM08174;AM03944	TRUE	TURE
9-1-2	9	AM07163;AM11068;AM04728;AM12455;AM05209;AM11209;AM06306;AM06263;AM11326;	0.263088	AM07163;AM04728;AM06306	0.0101649	AM04728;AM12455;AM11209;AM06306	1	NA	1	NA	1	NA	0.4135	AM11068	0.796666	AM07163	0.913696	AM05209	TRUE	TURE
9-1-3	3	AM03407;AM01958;AM02654;	0.10446	AM01958;AM02654	0.285096	AM01958	1	NA	1	NA	1	NA	1	NA	0.411887	AM03407	0.557986	AM03407	FALSE	FALSE
9-2-1	14	AM03558;AM03930;AM07844;AM09508;AM11499;AM11962;AM02831;AM12112;AM02754;AM03339;AM03118;AM08776;AM03737;AM05290;	0.0442523	AM09508;AM12112;AM02754;AM03118;AM08776;AM03737	0.0526273	AM03930;AM07844;AM11499;AM12112	0.620356	AM03339	1	NA	1	NA	1	NA	0.18032	AM03930;AM07844;AM03737;AM05290	0.224685	AM03558;AM07844;AM02831;AM12112;AM02754	TRUE	TURE
9-3-1	7	AM01067;AM04370;AM05948;AM07717;AM03942;AM04794;AM06717;	0.791286	AM07717	0.1643	AM05948;AM07717	1	NA	1	NA	1	NA	1	NA	1	NA	1	NA	FALSE	FALSE
9-4-1	9	AM05774;AM06730;AM12117;AM06586;AM08997;AM09076;AM12758;AM02711;AM10593;	0.0862348	AM05774;AM09076;AM12758;AM02711	0.0610195	AM05774;AM02711;AM10593	1	NA	1	NA	1	NA	0.4135	AM09076	0.442215	AM05774;AM12758	0.144366	AM05774;AM12117;AM12758;AM10593	FALSE	FALSE
9-4-2	3	AM01833;AM04366;AM12110;	0.488991	AM12110	1	NA	1	NA	1	NA	1	NA	1	NA	0.411887	AM04366	1	NA	FALSE	FALSE
9-5-1	7	AM04566;AM07898;AM07940;AM11171;AM06456;AM07726;AM01729;	1	NA	0.543062	AM06456	1	NA	1	NA	1	NA	1	NA	1	NA	1	NA	FALSE	FALSE
9-5-2	3	AM02976;AM02607;AM09996;	1	NA	1	NA	1	NA	1	NA	1	NA	1	NA	1	NA	0.557986	AM02607	FALSE	FALSE
9-6-1	8	AM05561;AM06114;AM07876;AM10131;AM04300;AM05824;AM07861;AM09630;	0.0566866	AM10131;AM04300;AM05824;AM09630	0.591446	AM06114	0.424957	AM07876	1	NA	1	NA	0.377666	AM05561	0.757283	AM07861	0.0981039	AM05561;AM10131;AM04300;AM07861	FALSE	FALSE
9-7-1	7	AM03165;AM04320;AM09556;AM06562;AM08449;AM08725;AM09685;	0.424683	AM04320;AM09685	0.1643	AM03165;AM09685	1	NA	1	NA	1	NA	1	NA	0.710275	AM06562	0.525327	AM09556;AM06562	FALSE	FALSE
9-8-1	10	AM00492;AM02468;AM01140;AM03579;AM02218;AM02636;AM09237;AM09308;AM01188;AM08812;	0.893388	AM01188	0.286542	AM01140;AM09308	1	NA	1	NA	1	NA	0.447274	AM02636	0.499706	AM03579;AM09237	0.0154929	AM00492;AM02468;AM02218;AM02636;AM09308;AM01188	FALSE	FALSE
9-8-2	4	AM11578;AM00517R;AM03281;AM03762;	1	NA	1	NA	0.241651	AM03762	1	NA	1	NA	1	NA	1	NA	1	NA	FALSE	FALSE
9-8-3	3	AM09213;AM07702;AM09558;	1	NA	0.0312127	AM09213;AM09558	1	NA	1	NA	1	NA	1	NA	1	NA	0.143201	AM07702;AM09558	TRUE	TURE
9-9-1	7	AM04175;AM04723;AM09412;AM03034;AM03039;AM08398;AM11509;	0.148843	AM09412;AM03039;AM11509	0.0298522	AM04723;AM03034;AM11509	1	NA	1	NA	1	NA	0.0572583	AM03039;AM08398	0.0894898	AM03034;AM03039;AM11509	0.219515	AM04723;AM03039;AM11509	TRUE	TURE
9-10-1	5	AM06037;AM07285;AM07549;AM04177;AM07220;	1	NA	0.0900902	AM07285;AM07220	1	NA	1	NA	0.0990867	AM06037	1	NA	1	NA	0.342374	AM07285;AM07220	FALSE	FALSE
9-11-1	5	AM04304;AM07705;AM02988;AM04040;AM07971;	0.673407	AM04040	0.428442	AM07971	0.29233	AM02988	1	NA	1	NA	1	NA	1	NA	1	NA	FALSE	FALSE
9-12-1	5	AM09985;AM10507;AM10775;AM02763;AM03566;	0.673407	AM09985	0.0900902	AM10775;AM03566	1	NA	1	NA	1	NA	1	NA	1	NA	0.743546	AM02763	FALSE	FALSE
9-13-1	3	AM03365;AM07742;AM11163;	0.488991	AM11163	0.285096	AM11163	1	NA	1	NA	1	NA	1	NA	1	NA	1	NA	FALSE	FALSE
9-14-1	3	AM04803;AM05648;AM06612;	0.10446	AM04803;AM06612	0.0312127	AM04803;AM05648	0.187347	AM06612	1	NA	1	NA	0.162906	AM06612	0.411887	AM04803	0.013511	AM04803;AM05648;AM06612	TRUE	TURE
9-15-1	5	AM07327;AM07510;AM05428;AM07479;AM11530;	1	NA	0.428442	AM07510	1	NA	1	NA	1	NA	1	NA	1	NA	0.743546	AM11530	FALSE	FALSE
9-16-1	5	AM04962;AM03671;AM08623;AM10738;AM10816;	0.0582705	AM04962;AM08623;AM10816	0.428442	AM04962	0.29233	AM10816	1	NA	1	NA	1	NA	0.187578	AM04962;AM10738	0.342374	AM04962;AM10738	FALSE	FALSE
10-1-1	13	AM00002;AM01059;AM01491;AM01710;AM01722;AM02373;AM03115;AM04392;AM00611;AM05761;AM12848R;AM01418;AM00733;	0.50025	AM01722;AM04392;AM05761	0.151677	AM01059;AM03115;AM04392	1	NA	1	NA	1	NA	0.537381	AM05761	0.899866	AM04392	0.018654	AM01059;AM01491;AM01710;AM02373;AM12848R;AM01418;AM00733	FALSE	FALSE
10-2-1	6	AM04516;AM02972;AM05403;AM09445;AM09681;AM07030;	1	NA	1	NA	1	NA	1	NA	1	NA	1	NA	0.654169	AM09681	0.804665	AM09681	FALSE	FALSE
10-3-1	5	AM01896;AM04002;AM00976;AM01381;AM01984;	0.263731	AM01896;AM00976	0.428442	AM00976	1	NA	1	NA	1	NA	1	NA	0.587203	AM01381	0.000765511	AM01896;AM04002;AM00976;AM01381;AM01984	FALSE	FALSE
10-4-1	7	AM02725;AM03978;AM04612;AM06699;AM09345;AM10426;AM10709;	0.791286	AM10426	0.543062	AM10426	1	NA	1	NA	1	NA	1	NA	1	NA	1	NA	FALSE	FALSE
10-5-1	5	AM02068;AM01464;AM02251;AM02496;AM12565;	0.673407	AM02068	0.428442	AM02251	1	NA	1	NA	1	NA	1	NA	0.187578	AM01464;AM02251	0.0914568	AM02068;AM02251;AM02496	FALSE	FALSE
10-6-1	5	AM04207;AM10682;AM12061;AM12228;AM12426;	0.673407	AM12228	0.428442	AM12228	0.29233	AM12426	1	NA	1	NA	0.256502	AM04207	0.187578	AM04207;AM12061	0.0914568	AM10682;AM12228;AM12426	FALSE	FALSE
10-7-1	4	AM12581;AM02508;AM04624;AM04882;	0.591472	AM02508	0.0580681	AM02508;AM04882	1	NA	1	NA	1	NA	1	NA	0.507278	AM02508	0.663312	AM02508	FALSE	FALSE
10-8-1	4	AM04448;AM08912;AM09578;AM12622;	0.591472	AM04448	0.0580681	AM04448;AM12622	1	NA	1	NA	1	NA	1	NA	1	NA	0.242007	AM04448;AM08912	FALSE	FALSE
10-9-1	6	AM00722;AM04313;AM09428;AM10926;AM11619;AM12281;	1	NA	1	NA	0.339627	AM11619	1	NA	1	NA	1	NA	0.0579814	AM00722;AM04313;AM12281	0.437952	AM00722;AM10926	FALSE	FALSE
10-10-1	4	AM00802;AM10705;AM00699;AM09767;	0.591472	AM09767	1	NA	1	NA	1	NA	1	NA	0.211089	AM09767	1	NA	0.663312	AM10705	FALSE	FALSE
10-11-1	4	AM01005;AM01773;AM10120;AM02968;	1	NA	0.0580681	AM01005;AM01773	1	NA	1	NA	1	NA	1	NA	0.507278	AM01005	0.242007	AM01005;AM01773	FALSE	FALSE
10-12-1	4	AM01243;AM07617;AM08710;AM00766;	0.591472	AM01243	0.360772	AM01243	1	NA	1	NA	1	NA	1	NA	1	NA	0.663312	AM01243	FALSE	FALSE
10-13-1	6	AM01699;AM01740;AM01801;AM11061;AM12624;AM08647;	0.345872	AM01699;AM01740	0.0184984	AM01801;AM11061;AM08647	1	NA	1	NA	1	NA	0.299304	AM01740	0.0579814	AM01801;AM11061;AM12624	0.00368232	AM01699;AM01740;AM01801;AM12624;AM08647	TRUE	TURE
11-1-1	8	AM01379;AM08290;AM07916;AM00234;AM00364;AM04853;AM11357;AM00225;	1	NA	1	NA	0.0954244	AM07916;AM04853	1	NA	1	NA	1	NA	0.126454	AM07916;AM00234;AM11357	0.602982	AM01379;AM00234	FALSE	FALSE
11-1-2	3	AM09945;AM01046;AM03881;	1	NA	1	NA	1	NA	1	NA	1	NA	1	NA	0.411887	AM01046	0.557986	AM01046	FALSE	FALSE
11-2-1	7	AM00669R;AM00670;AM01142;AM04535;AM10298;AM12322;AM09929;	0.791286	AM04535	1	NA	1	NA	1	NA	1	NA	1	NA	0.710275	AM00669R	0.219515	AM00670;AM01142;AM12322	FALSE	FALSE
11-3-1	9	AM00934;AM04930;AM00779R;AM00828;AM00981;AM01732;AM05739;AM08781;AM09537;	0.866628	AM01732	1	NA	0.463398	AM05739	1	NA	1	NA	1	NA	0.442215	AM00981;AM01732	0.670589	AM01732;AM09537	FALSE	FALSE
11-4-1	6	AM08332;AM12753R;AM12905;AM02873;AM07978;AM09062;	1	NA	1	NA	1	NA	1	NA	1	NA	1	NA	0.654169	AM08332	0.804665	AM12905	FALSE	FALSE
11-5-1	6	AM01549;AM02295;AM12779;AM06049;AM09628;AM11296;	1	NA	0.488954	AM06049	0.339627	AM06049	0.0216704	AM11296	1	NA	0.299304	AM06049	1	NA	0.804665	AM06049	FALSE	FALSE
11-6-1	5	AM00687R;AM11738;AM11888;AM02439;AM11650;	0.673407	AM00687R	0.428442	AM11888	1	NA	1	NA	1	NA	1	NA	0.587203	AM00687R	1	NA	FALSE	FALSE
11-6-2	3	AM05381;AM10170;AM11106;	0.10446	AM05381;AM10170	0.285096	AM05381	0.0127814	AM05381;AM11106	1	NA	1	NA	1	NA	0.00425929	AM05381;AM10170;AM11106	0.557986	AM05381	FALSE	FALSE
11-7-1	5	AM00334;AM01071;AM09875;AM10945;AM11135;	0.673407	AM11135	1	NA	1	NA	1	NA	1	NA	1	NA	1	NA	0.743546	AM00334	FALSE	FALSE
11-8-1	4	AM00411;AM02067;AM04604;AM10959;	0.591472	AM10959	0.360772	AM00411	1	NA	1	NA	1	NA	1	NA	0.507278	AM00411	1	NA	FALSE	FALSE
11-9-1	7	AM03332;AM07595;AM11123;AM00268;AM00318;AM00871;AM10155;	1	NA	1	NA	0.383765	AM00268	1	NA	1	NA	1	NA	1	NA	0.851222	AM10155	FALSE	FALSE
11-10-1	5	AM09170;AM00794;AM01900;AM02495;AM12706R;	0.673407	AM02495	1	NA	1	NA	1	NA	1	NA	1	NA	0.587203	AM02495	0.342374	AM09170;AM02495	FALSE	FALSE
11-11-1	4	AM02612;AM12266;AM00344;AM03526;	0.591472	AM00344	1	NA	1	NA	1	NA	1	NA	0.211089	AM02612	1	NA	1	NA	FALSE	FALSE
12-1-1	7	AM12685;AM11658;AM05109;AM06108;AM00769R;AM07247;AM08261;	1	NA	0.543062	AM07247	1	NA	1	NA	1	NA	0.339644	AM07247	1	NA	1	NA	FALSE	FALSE
12-1-2	4	AM06883;AM06906;AM00627;AM09365;	0.591472	AM09365	1	NA	1	NA	1	NA	1	NA	1	NA	0.507278	AM06883	0.242007	AM06883;AM00627	FALSE	FALSE
12-1-3	4	AM01143;AM04259;AM01021R;AM01483;	0.181547	AM04259;AM01483	1	NA	1	NA	1	NA	1	NA	0.211089	AM04259	0.507278	AM04259	1	NA	FALSE	FALSE
12-2-1	5	AM07002;AM03194;AM06930;AM03309;AM08703;	1	NA	1	NA	0.29233	AM08703	1	NA	1	NA	1	NA	1	NA	0.743546	AM03309	FALSE	FALSE
12-2-2	3	AM08650;AM03783;AM03857;	0.488991	AM03857	1	NA	1	NA	1	NA	1	NA	1	NA	1	NA	0.557986	AM08650	FALSE	FALSE
12-3-1	4	AM05930;AM01020;AM01395;AM00606R;	1	NA	1	NA	1	NA	1	NA	1	NA	1	NA	1	NA	0.663312	AM01395	FALSE	FALSE
12-4-1	5	AM10594;AM00850R;AM09828;AM00942;AM04877;	1	NA	1	NA	1	NA	1	NA	1	NA	1	NA	1	NA	1	NA	FALSE	FALSE
12-5-1	4	AM04036;AM01040;AM00639R;AM02826;	1	NA	0.360772	AM01040	1	NA	1	NA	1	NA	1	NA	1	NA	1	NA	FALSE	FALSE
12-5-2	3	AM05639;AM07197;AM07481;	1	NA	1	NA	1	NA	1	NA	1	NA	1	NA	1	NA	1	NA	FALSE	FALSE
12-6-1	5	AM00679;AM08194;AM02714;AM03229;AM05229;	1	NA	1	NA	1	NA	1	NA	0.0990867	AM03229	0.256502	AM03229	1	NA	0.743546	AM03229	FALSE	FALSE
12-6-2	4	AM09824;AM00651;AM00718;AM04745;	1	NA	1	NA	1	NA	1	NA	1	NA	1	NA	1	NA	0.663312	AM00718	FALSE	FALSE
12-7-1	4	AM02569;AM02598;AM08171;AM08814;	1	NA	1	NA	0.241651	AM08814	1	NA	1	NA	0.211089	AM02598	1	NA	1	NA	FALSE	FALSE
12-12-1	3	AM00261;AM00385;AM03471;	1	NA	1	NA	1	NA	1	NA	1	NA	1	NA	1	NA	0.557986	AM03471	FALSE	FALSE
12-13-1	3	AM05302;AM08855;AM09205;	1	NA	1	NA	0.187347	AM05302	1	NA	0.0606837	AM08855	1	NA	1	NA	1	NA	FALSE	FALSE
13-1-1	5	AM03903;AM09981;AM04879;AM06390;AM08778;	0.263731	AM03903;AM06390	0.428442	AM04879	1	NA	1	NA	1	NA	1	NA	1	NA	0.743546	AM04879	FALSE	FALSE
13-1-2	4	AM04971;AM02157;AM03764;AM05259;	0.00161316	AM04971;AM02157;AM03764;AM05259	0.360772	AM04971	1	NA	1	NA	1	NA	0.211089	AM05259	0.125713	AM04971;AM05259	0.663312	AM04971	TRUE	TURE
13-2-1	4	AM08040;AM11654;AM12806;AM11521;	0.591472	AM08040	1	NA	1	NA	1	NA	1	NA	1	NA	1	NA	1	NA	FALSE	FALSE
13-3-1	3	AM07706;AM09029;AM11816;	1	NA	1	NA	1	NA	1	NA	1	NA	1	NA	1	NA	1	NA	FALSE	FALSE
13-4-1	3	AM09416;AM02709;AM12367;	0.488991	AM12367	1	NA	1	NA	1	NA	1	NA	0.00954266	AM09416;AM12367	0.0703402	AM02709;AM12367	0.143201	AM09416;AM12367	FALSE	FALSE
14-1-1	6	AM00987;AM07716;AM08401;AM03020;AM11260;AM12282;	0.345872	AM11260;AM12282	1	NA	1	NA	1	NA	0.117698	AM12282	0.299304	AM11260	0.654169	AM11260	0.437952	AM03020;AM12282	FALSE	FALSE
14-1-2	5	AM02085;AM09564;AM12638;AM04023;AM12354;	1	NA	0.0900902	AM09564;AM12638	0.29233	AM04023	1	NA	1	NA	1	NA	1	NA	1	NA	FALSE	FALSE
14-1-3	3	AM05078;AM08433;AM08769;	0.488991	AM05078	1	NA	1	NA	1	NA	1	NA	1	NA	1	NA	0.557986	AM08433	FALSE	FALSE
14-2-1	7	AM05447;AM03969;AM08743;AM09966;AM11380;AM04589;AM08765;	0.791286	AM04589	1	NA	1	NA	1	NA	0.135925	AM08743	1	NA	0.710275	AM08743	0.851222	AM04589	FALSE	FALSE
14-3-1	3	AM12841R;AM07414;AM10836;	0.00805296	AM12841R;AM07414;AM10836	1	NA	1	NA	1	NA	1	NA	1	NA	1	NA	0.557986	AM12841R	TRUE	TURE
14-4-1	4	AM04642;AM06046;AM07569;AM01282;	1	NA	1	NA	1	NA	1	NA	1	NA	1	NA	0.125713	AM06046;AM01282	0.242007	AM07569;AM01282	FALSE	FALSE
14-5-1	4	AM04613;AM00086;AM03742;AM06521;	0.591472	AM06521	1	NA	1	NA	1	NA	1	NA	1	NA	1	NA	1	NA	FALSE	FALSE
14-6-1	4	AM08767;AM10162;AM02549;AM01559;	1	NA	0.360772	AM01559	1	NA	1	NA	1	NA	1	NA	1	NA	0.242007	AM02549;AM01559	FALSE	FALSE
14-6-2	3	AM05382;AM07004;AM10932;	1	NA	1	NA	1	NA	1	NA	1	NA	1	NA	1	NA	0.557986	AM07004	FALSE	FALSE
14-7-1	7	AM09056;AM01441;AM07678;AM12627;AM03395;AM04169;AM07106;	0.791286	AM07106	1	NA	0.383765	AM12627	1	NA	1	NA	1	NA	0.710275	AM12627	0.525327	AM01441;AM12627	FALSE	FALSE
14-8-1	5	AM05642;AM04978;AM06026;AM08130;AM05150;	1	NA	0.428442	AM08130	1	NA	1	NA	1	NA	1	NA	1	NA	1	NA	FALSE	FALSE
14-9-1	4	AM07991;AM02901;AM01756;AM08087;	0.591472	AM08087	1	NA	1	NA	1	NA	1	NA	1	NA	1	NA	0.663312	AM08087	FALSE	FALSE
14-10-1	4	AM01370;AM06068;AM03812;AM05553;	0.181547	AM01370;AM03812	1	NA	1	NA	1	NA	1	NA	1	NA	0.507278	AM01370	0.242007	AM01370;AM06068	FALSE	FALSE
14-12-1	3	AM05335;AM07710;AM09930;	1	NA	1	NA	1	NA	1	NA	1	NA	1	NA	1	NA	1	NA	FALSE	FALSE
14-13-1	3	AM08863;AM09252;AM01486;	1	NA	1	NA	1	NA	1	NA	1	NA	1	NA	1	NA	0.143201	AM08863;AM01486	FALSE	FALSE
14-14-1	5	AM00517;AM01965;AM10588;AM11604;AM03908;	1	NA	1	NA	1	NA	1	NA	1	NA	1	NA	1	NA	0.743546	AM10588	FALSE	FALSE
15-1-1	21	AM03770;AM04203;AM11210;AM04915;AM06314;AM03364;AM02531;AM03173;AM04166;AM09121;AM10900;AM11335;AM00523;AM07337;AM12323;AM04429;AM12048;AM05112;AM08981;AM03333;AM12871;	2.07374e-15	AM03770;AM04203;AM11210;AM04915;AM06314;AM03364;AM02531;AM03173;AM04166;AM09121;AM10900;AM11335;AM00523;AM07337;AM12323;AM04429;AM12048;AM05112;AM08981;AM03333;AM12871	0.386493	AM11210;AM02531;AM09121	0.766175	AM12323	1	NA	1	NA	0.116934	AM07337;AM05112;AM03333	2.60913e-15	AM03770;AM04203;AM11210;AM04915;AM06314;AM03364;AM02531;AM03173;AM04166;AM09121;AM10900;AM11335;AM00523;AM07337;AM04429;AM12048;AM05112;AM08981;AM03333;AM12871	5.39066e-08	AM03770;AM04203;AM11210;AM04915;AM06314;AM03364;AM02531;AM03173;AM09121;AM10900;AM11335;AM00523;AM07337;AM04429;AM05112;AM03333;AM12871	TRUE	TURE
15-1-2	8	AM09051;AM11668;AM02737;AM10657;AM11549;AM04759;AM07491;AM12292;	2.58969e-06	AM09051;AM11668;AM02737;AM10657;AM11549;AM04759;AM07491;AM12292	0.00615919	AM09051;AM11668;AM11549;AM12292	0.424957	AM07491	1	NA	1	NA	1	NA	2.0086e-05	AM09051;AM11668;AM02737;AM11549;AM04759;AM07491;AM12292	0.0981039	AM09051;AM02737;AM10657;AM12292	TRUE	TURE
15-1-3	8	AM10294;AM01191;AM00099;AM04615;AM08324;AM08726;AM09027;AM11850;	2.58969e-06	AM10294;AM01191;AM00099;AM04615;AM08324;AM08726;AM09027;AM11850	0.204377	AM10294;AM08726	0.424957	AM11850	1	NA	0.153778	AM00099	0.377666	AM09027	2.0086e-05	AM10294;AM01191;AM00099;AM04615;AM08726;AM09027;AM11850	0.0981039	AM10294;AM04615;AM08324;AM11850	TRUE	TURE
15-1-4	6	AM08344;AM02339;AM05992;AM08279;AM12908;AM06842;	6.46735e-05	AM08344;AM02339;AM05992;AM08279;AM12908;AM06842	1	NA	0.339627	AM08279	1	NA	1	NA	1	NA	0.000579796	AM08344;AM02339;AM05992;AM08279;AM06842	0.804665	AM02339	TRUE	TURE
15-1-5	5	AM05512;AM07470;AM03745;AM11945;AM02211;	0.000323049	AM05512;AM07470;AM03745;AM11945;AM02211	1	NA	0.29233	AM03745	1	NA	1	NA	0.256502	AM05512	0.00300263	AM05512;AM03745;AM11945;AM02211	0.743546	AM03745	TRUE	TURE
15-1-6	4	AM11056;AM07729;AM09591;AM09923;	0.00161316	AM11056;AM07729;AM09591;AM09923	0.0580681	AM11056;AM09591	1	NA	1	NA	0.0800848	AM09591	0.0183585	AM11056;AM09591	0.000689883	AM11056;AM07729;AM09591;AM09923	0.0443947	AM07729;AM09591;AM09923	TRUE	TURE
15-1-7	4	AM10500;AM11293;AM08102;AM12508;	0.00161316	AM10500;AM11293;AM08102;AM12508	1	NA	1	NA	1	NA	1	NA	1	NA	0.000689883	AM10500;AM11293;AM08102;AM12508	1	NA	TRUE	TURE
15-2-1	7	AM02860;AM04033;AM00556;AM08328;AM05844;AM06653;AM09039;	0.000375053	AM02860;AM04033;AM00556;AM08328;AM06653;AM09039	0.0298522	AM04033;AM00556;AM06653	1	NA	0.000269916	AM04033;AM09039	0.00833115	AM04033;AM09039	0.0572583	AM06653;AM09039	0.0159703	AM04033;AM00556;AM06653;AM09039	0.525327	AM04033;AM09039	TRUE	TURE
15-2-2	6	AM02325;AM05294;AM12231;AM03615;AM02855;AM06528;	0.00161492	AM02325;AM05294;AM12231;AM03615;AM06528	0.488954	AM02855	1	NA	1	NA	2.58275e-06	AM05294;AM12231;AM02855;AM06528	0.299304	AM06528	0.0579814	AM05294;AM12231;AM02855	1	NA	TRUE	TURE
15-2-3	5	AM05968;AM03147;AM05366;AM04136;AM09953;	0.000323049	AM05968;AM03147;AM05366;AM04136;AM09953	0.428442	AM04136	0.29233	AM09953	1	NA	0.00407726	AM05968;AM05366	0.256502	AM09953	0.587203	AM04136	0.743546	AM04136	TRUE	TURE
15-2-4	4	AM09289;AM03480;AM04959;AM10631;	0.0273724	AM09289;AM04959;AM10631	0.0580681	AM09289;AM10631	1	NA	1	NA	0.0800848	AM10631	1	NA	0.000689883	AM09289;AM03480;AM04959;AM10631	0.242007	AM03480;AM10631	TRUE	TURE
15-2-5	3	AM02540;AM02167;AM02635;	0.00805296	AM02540;AM02167;AM02635	0.0312127	AM02540;AM02167	1	NA	1	NA	0.0606837	AM02635	0.000189859	AM02540;AM02167;AM02635	0.0703402	AM02540;AM02635	0.013511	AM02540;AM02167;AM02635	TRUE	TURE
15-3-1	3	AM12887;AM04168;AM05380;	0.10446	AM12887;AM04168	1	NA	0.187347	AM04168	1	NA	1	NA	0.162906	AM05380	0.0703402	AM12887;AM04168	0.143201	AM12887;AM04168	FALSE	FALSE
15-3-2	3	AM10862;AM01231;AM07286;	0.10446	AM10862;AM01231	0.285096	AM10862	1	NA	1	NA	1	NA	1	NA	0.00425929	AM10862;AM01231;AM07286	1	NA	FALSE	FALSE
15-4-1	5	AM03958;AM04639;AM04830;AM05638;AM09885;	0.000323049	AM03958;AM04639;AM04830;AM05638;AM09885	0.428442	AM04639	1	NA	1	NA	0.00407726	AM05638;AM09885	1	NA	0.00300263	AM04639;AM04830;AM05638;AM09885	0.0914568	AM03958;AM04830;AM05638	TRUE	TURE
15-5-1	3	AM04546;AM04439;AM10770;	0.10446	AM04546;AM10770	0.285096	AM04546	1	NA	1	NA	0.00125722	AM04546;AM04439	0.162906	AM04546	0.0703402	AM04546;AM10770	0.557986	AM04546	FALSE	FALSE
15-6-1	3	AM00513;AM08251;AM10460;	0.00805296	AM00513;AM08251;AM10460	1	NA	1	NA	1	NA	1	NA	1	NA	0.0703402	AM08251;AM10460	0.143201	AM00513;AM08251	TRUE	TURE
15-7-1	3	AM06202;AM06519;AM11377;	0.00805296	AM06202;AM06519;AM11377	0.0312127	AM06519;AM11377	1	NA	1	NA	0.0606837	AM06519	0.162906	AM11377	0.00425929	AM06202;AM06519;AM11377	1	NA	TRUE	TURE
15-8-1	4	AM10829;AM00719;AM08751;AM09255;	0.00161316	AM10829;AM00719;AM08751;AM09255	1	NA	1	NA	1	NA	1	NA	1	NA	0.507278	AM09255	0.663312	AM09255	TRUE	TURE
16-1-1	29	AM02293;AM02451;AM10677;AM05006;AM05371;AM07886;AM10512;AM11812;AM06302;AM04157;AM12151;AM04263;AM04656;AM07611;AM08232;AM10036;AM01362;AM02497;AM03346;AM03774;AM07731;AM09079;AM09839;AM03289;AM07532;AM11331;AM04903;AM11191;AM01480;	0.0070258	AM02451;AM10677;AM12151;AM04263;AM08232;AM01362;AM07731;AM09079;AM09839;AM11331;AM04903;AM11191	0.368894	AM04263;AM01362;AM09079;AM04903	1	NA	1	NA	1	NA	0.50347	AM10677;AM08232	1	NA	0.0273299	AM02451;AM05371;AM10512;AM11812;AM12151;AM08232;AM01362;AM07731;AM09079;AM07532;AM04903;AM01480	TRUE	TURE
16-1-2	5	AM06926;AM03369;AM04601;AM03197;AM01563;	1	NA	0.428442	AM04601	1	NA	1	NA	1	NA	1	NA	1	NA	0.342374	AM04601;AM01563	FALSE	FALSE
16-1-3	4	AM12826;AM06149;AM10115;AM09609;	0.591472	AM09609	1	NA	1	NA	1	NA	1	NA	1	NA	1	NA	0.663312	AM12826	FALSE	FALSE
16-1-4	3	AM06573;AM10737;AM04707;	0.488991	AM06573	1	NA	1	NA	1	NA	1	NA	1	NA	1	NA	0.143201	AM06573;AM10737	FALSE	FALSE
16-2-1	10	AM01450;AM09892;AM05727;AM06442;AM03103;AM04308;AM06714;AM01599;AM05071;AM05396;	0.323692	AM06714;AM05071;AM05396	0.673395	AM05396	0.499272	AM05071	1	NA	0.188388	AM05396	1	NA	0.0137376	AM01450;AM03103;AM01599;AM05071;AM05396	0.43884	AM01450;AM05727;AM05071	FALSE	FALSE
16-2-2	5	AM04468;AM12163;AM04549;AM05597;AM08318;	0.673407	AM05597	1	NA	1	NA	1	NA	1	NA	1	NA	0.587203	AM08318	0.0914568	AM04468;AM04549;AM08318	FALSE	FALSE
16-3-1	3	AM00884;AM06066;AM03084;	1	NA	1	NA	1	NA	0.0108933	AM06066	1	NA	1	NA	1	NA	0.557986	AM06066	FALSE	FALSE
16-4-1	4	AM01123;AM07735;AM10897;AM04837;	0.591472	AM04837	0.360772	AM04837	0.241651	AM04837	1	NA	1	NA	1	NA	0.507278	AM01123	0.0443947	AM01123;AM07735;AM10897	FALSE	FALSE
16-5-1	6	AM05255;AM08038;AM04427;AM11581;AM09078;AM10150;	0.738914	AM10150	0.488954	AM04427	0.339627	AM10150	1	NA	0.117698	AM04427	0.299304	AM11581	1	NA	1	NA	FALSE	FALSE
16-6-1	6	AM03040;AM04442;AM06414;AM09596;AM12064;AM07920;	0.738914	AM03040	1	NA	0.339627	AM06414	1	NA	1	NA	1	NA	1	NA	1	NA	FALSE	FALSE
16-7-1	3	AM05995;AM08217;AM03403;	1	NA	1	NA	1	NA	1	NA	1	NA	1	NA	1	NA	0.557986	AM08217	FALSE	FALSE
16-8-1	7	AM04251;AM04862;AM05796;AM06226;AM08132;AM10801;AM11161;	0.424683	AM05796;AM11161	0.1643	AM06226;AM11161	1	NA	1	NA	1	NA	0.339644	AM10801	1	NA	0.219515	AM04862;AM06226;AM10801	FALSE	FALSE
16-10-1	5	AM11737;AM06555;AM07037;AM12869;AM04213;	0.673407	AM12869	0.428442	AM07037	0.29233	AM11737	1	NA	1	NA	1	NA	1	NA	1	NA	FALSE	FALSE
17-1-1	17	AM00759;AM00963R;AM01146;AM01566;AM02262;AM02862;AM03743;AM04975;AM05367;AM07553;AM08136;AM10110;AM10366;AM11936;AM12700;AM12756;AM12878;	8.67285e-07	AM00759;AM00963R;AM01146;AM01566;AM02262;AM03743;AM05367;AM07553;AM08136;AM10366;AM11936;AM12700;AM12878	0.850856	AM01566	0.315664	AM03743;AM08136	1	NA	1	NA	1	NA	1.3261e-10	AM00759;AM00963R;AM01146;AM01566;AM02262;AM03743;AM04975;AM05367;AM08136;AM10110;AM10366;AM11936;AM12700;AM12756;AM12878	0.990237	AM02262	TRUE	TURE
17-2-1	5	AM02701;AM01893;AM02372;AM02670;AM03691;	0.263731	AM01893;AM03691	0.428442	AM01893	1	NA	1	NA	1	NA	0.0294382	AM01893;AM02372	0.587203	AM03691	0.743546	AM02372	FALSE	FALSE
17-2-2	4	AM00457;AM00410;AM00556R;AM01042;	1	NA	0.0580681	AM00410;AM01042	1	NA	1	NA	1	NA	1	NA	1	NA	0.242007	AM00410;AM01042	FALSE	FALSE
17-2-3	3	AM04574;AM01928;AM00681;	0.10446	AM04574;AM01928	1	NA	1	NA	1	NA	1	NA	0.162906	AM01928	0.0703402	AM01928;AM00681	0.013511	AM04574;AM01928;AM00681	FALSE	FALSE
17-3-1	5	AM12135;AM06846;AM08779;AM06451;AM02795;	0.0582705	AM12135;AM06846;AM08779	0.428442	AM06451	1	NA	1	NA	0.0990867	AM02795	1	NA	0.00300263	AM06846;AM08779;AM06451;AM02795	0.0914568	AM12135;AM06846;AM02795	FALSE	FALSE
17-3-2	4	AM00464;AM03494;AM05971;AM08079;	0.0273724	AM00464;AM05971;AM08079	1	NA	1	NA	1	NA	1	NA	0.211089	AM08079	0.0149675	AM00464;AM05971;AM08079	0.0443947	AM03494;AM05971;AM08079	TRUE	TURE
17-4-1	9	AM00244;AM00361;AM04740;AM11854;AM00360;AM02738;AM10109;AM09386;AM09554;	0.00309721	AM00244;AM04740;AM11854;AM00360;AM10109;AM09386	1	NA	1	NA	1	NA	1	NA	0.4135	AM02738	7.64546e-08	AM00244;AM00361;AM04740;AM11854;AM00360;AM02738;AM10109;AM09386;AM09554	0.36636	AM00361;AM11854;AM02738	TRUE	TURE
17-5-1	9	AM12798;AM00352;AM00353;AM00354;AM00355;AM00356;AM00357;AM00358;AM00359;	0.565373	AM12798;AM00358	1	NA	1	NA	1	NA	1	NA	1	NA	7.64546e-08	AM12798;AM00352;AM00353;AM00354;AM00355;AM00356;AM00357;AM00358;AM00359	1	NA	FALSE	FALSE
17-6-1	5	AM03437;AM02499;AM03632;AM10029;AM11481;	0.263731	AM02499;AM03632	0.0900902	AM03437;AM02499	0.29233	AM03632	1	NA	1	NA	0.256502	AM02499	0.000111697	AM03437;AM02499;AM03632;AM10029;AM11481	0.743546	AM03437	FALSE	FALSE
17-7-1	3	AM06214;AM00438;AM12887R;	0.00805296	AM06214;AM00438;AM12887R	0.0312127	AM06214;AM00438	1	NA	1	NA	1	NA	1	NA	0.00425929	AM06214;AM00438;AM12887R	0.557986	AM00438	TRUE	TURE
18-2-1	5	AM08862;AM12218;AM05749;AM07531;AM09557;	0.263731	AM12218;AM09557	1	NA	1	NA	1	NA	1	NA	0.0294382	AM12218;AM05749	0.0329148	AM12218;AM05749;AM07531	0.0914568	AM12218;AM05749;AM07531	FALSE	FALSE
18-3-1	6	AM11194;AM05769;AM07444;AM10679;AM05393;AM08071;	0.00161492	AM11194;AM05769;AM07444;AM10679;AM05393	0.125886	AM11194;AM10679	0.00510059	AM05769;AM07444;AM05393	1	NA	1	NA	1	NA	0.000579796	AM11194;AM05769;AM07444;AM10679;AM05393	0.804665	AM10679	TRUE	TURE
18-5-1	6	AM02476;AM11251;AM10935;AM03209;AM02296;AM08153;	0.345872	AM02476;AM08153	0.488954	AM02476	0.339627	AM03209	1	NA	1	NA	1	NA	0.654169	AM02296	0.151218	AM02476;AM03209;AM02296	FALSE	FALSE
18-5-2	3	AM03348;AM01009;AM03204;	0.488991	AM01009	0.285096	AM03348	1	NA	1	NA	1	NA	1	NA	0.411887	AM01009	0.557986	AM03348	FALSE	FALSE
18-5-3	3	AM02049;AM02076;AM02562;	0.488991	AM02562	1	NA	1	NA	1	NA	1	NA	1	NA	1	NA	0.013511	AM02049;AM02076;AM02562	FALSE	FALSE
18-6-1	3	AM05468;AM03909;AM07688;	0.488991	AM03909	0.285096	AM07688	1	NA	1	NA	0.0606837	AM05468	0.162906	AM07688	0.00425929	AM05468;AM03909;AM07688	1	NA	FALSE	FALSE
19-1-1	11	AM02927;AM05253;AM05349;AM06484;AM06738;AM08263;AM09387;AM09615;AM11570;AM11616;AM12536;	0.000237919	AM05253;AM06484;AM06738;AM08263;AM09387;AM09615;AM11616;AM12536	0.707986	AM12536	1	NA	1	NA	1	NA	1	NA	0.553227	AM06738;AM09387	0.507861	AM05349;AM06484;AM08263	TRUE	TURE
19-2-1	11	AM06744;AM09031;AM09109;AM11801;AM06715;AM06350;AM07576;AM07757;AM08416;AM11722;AM12184;	0.384264	AM07757;AM08416;AM12184	0.707986	AM11801	0.53275	AM07576	1	NA	1	NA	0.12896	AM11801;AM12184	0.0879677	AM09031;AM11801;AM06350;AM08416	0.000836281	AM06744;AM09031;AM09109;AM11801;AM06350;AM08416;AM11722;AM12184	FALSE	FALSE
19-3-1	8	AM01004;AM03238;AM03872;AM04087;AM06904;AM08025;AM11844;AM11874;	0.0566866	AM03238;AM03872;AM04087;AM08025	1	NA	1	NA	1	NA	1	NA	1	NA	0.000375723	AM01004;AM03238;AM03872;AM04087;AM08025;AM11844	0.292362	AM01004;AM03238;AM08025	FALSE	FALSE
19-4-1	8	AM12893;AM00235;AM01653;AM03802;AM01187;AM08715;AM09096;AM10348;	0.833156	AM03802	1	NA	1	NA	1	NA	1	NA	0.377666	AM00235	1	NA	1	NA	FALSE	FALSE
19-4-2	4	AM01931;AM05976;AM07252;AM04703;	0.591472	AM07252	1	NA	1	NA	1	NA	1	NA	1	NA	1	NA	0.242007	AM01931;AM07252	FALSE	FALSE
19-5-1	8	AM01506;AM03182;AM06649;AM07422;AM09496;AM10048;AM12021;AM12882;	0.498199	AM06649;AM12021	1	NA	0.424957	AM06649	1	NA	1	NA	0.377666	AM01506	0.0278819	AM01506;AM03182;AM07422;AM12021	0.0222068	AM03182;AM06649;AM09496;AM12021;AM12882	FALSE	FALSE
19-6-1	5	AM01172;AM03207;AM05244;AM05348;AM06076;	0.263731	AM03207;AM05244	1	NA	1	NA	1	NA	1	NA	1	NA	1	NA	0.0914568	AM01172;AM03207;AM05348	FALSE	FALSE
20-1-1	4	AM03694;AM03827;AM09756;AM00496;	0.591472	AM00496	0.360772	AM00496	1	NA	1	NA	0.0800848	AM03827	1	NA	0.507278	AM03827	1	NA	FALSE	FALSE
21-1-1	8	AM07799;AM08914;AM09017;AM09072;AM10136;AM10340;AM11242;AM11329;	0.204137	AM10136;AM11242;AM11329	0.044068	AM08914;AM10136;AM11329	0.424957	AM07799	1	NA	1	NA	1	NA	1	NA	0.292362	AM09017;AM09072;AM11329	TRUE	TURE
21-2-1	5	AM03785;AM05981;AM06110;AM06590;AM03711;	0.263731	AM05981;AM03711	0.428442	AM03785	1	NA	1	NA	1	NA	1	NA	0.587203	AM06110	0.342374	AM05981;AM06110	FALSE	FALSE
21-3-1	3	AM04338;AM08672;AM05951;	0.488991	AM08672	1	NA	1	NA	1	NA	1	NA	1	NA	1	NA	0.557986	AM05951	FALSE	FALSE
21-4-1	3	AM09879;AM00923;AM03203;	0.488991	AM03203	1	NA	0.187347	AM03203	1	NA	1	NA	1	NA	0.411887	AM03203	0.557986	AM00923	FALSE	FALSE
22-1-1	7	AM03874;AM05356;AM06861;AM07274;AM08085;AM06884;AM11160;	0.000375053	AM03874;AM05356;AM06861;AM07274;AM08085;AM06884	0.0298522	AM03874;AM05356;AM07274	1	NA	1	NA	0.135925	AM03874	0.339644	AM03874	0.0017568	AM03874;AM05356;AM07274;AM08085;AM06884	0.851222	AM07274	TRUE	TURE
22-1-2	3	AM01100;AM08274;AM09132;	0.00805296	AM01100;AM08274;AM09132	1	NA	1	NA	1	NA	1	NA	1	NA	0.00425929	AM01100;AM08274;AM09132	0.557986	AM08274	TRUE	TURE
22-2-1	3	AM11900;AM03163;AM12781;	0.00805296	AM11900;AM03163;AM12781	0.285096	AM12781	1	NA	1	NA	0.0606837	AM03163	1	NA	0.411887	AM03163	1	NA	TRUE	TURE
22-3-1	5	AM00092;AM09871;AM06484R;AM09057;AM04793;	0.0582705	AM09871;AM06484R;AM04793	1	NA	0.29233	AM09057	1	NA	1	NA	1	NA	0.00300263	AM00092;AM09871;AM06484R;AM04793	0.743546	AM06484R	FALSE	FALSE
22-3-2	4	AM02314;AM01403;AM01201;AM02204;	0.181547	AM02314;AM02204	0.360772	AM01201	1	NA	1	NA	1	NA	1	NA	0.125713	AM02314;AM02204	0.00321641	AM02314;AM01403;AM01201;AM02204	FALSE	FALSE
22-3-3	4	AM01055;AM01734;AM06596;AM12129;	0.0273724	AM01055;AM01734;AM12129	1	NA	1	NA	1	NA	1	NA	1	NA	0.0149675	AM01055;AM01734;AM06596	1	NA	TRUE	TURE
22-4-1	3	AM05514;AM09326;AM11525;	0.10446	AM05514;AM09326	0.285096	AM11525	1	NA	1	NA	1	NA	0.162906	AM09326	0.411887	AM11525	0.557986	AM11525	FALSE	FALSE
23-1-1	5	AM08825;AM10332;AM03514;AM04405;AM05675;	0.0582705	AM08825;AM03514;AM04405	0.428442	AM08825	1	NA	1	NA	0.0990867	AM05675	0.0294382	AM10332;AM05675	0.0329148	AM08825;AM03514;AM05675	0.342374	AM08825;AM05675	FALSE	FALSE
23-2-1	6	AM03679;AM05777;AM08177;AM10689;AM11754;AM06733;	0.738914	AM06733	0.488954	AM06733	1	NA	1	NA	1	NA	1	NA	0.252377	AM05777;AM08177	0.0316954	AM05777;AM08177;AM10689;AM06733	FALSE	FALSE
23-3-1	5	AM03396;AM05593;AM09105;AM10434;AM12914;	0.0582705	AM03396;AM05593;AM10434	0.0900902	AM03396;AM10434	1	NA	1	NA	1	NA	1	NA	0.0329148	AM03396;AM10434;AM12914	0.342374	AM03396;AM12914	FALSE	FALSE
23-4-1	5	AM02942;AM03434;AM04395;AM09986;AM10433;	0.263731	AM02942;AM03434	0.428442	AM10433	1	NA	1	NA	1	NA	1	NA	0.587203	AM04395	0.743546	AM02942	FALSE	FALSE
24-1-1	7	AM00658R;AM05085;AM02328;AM02342;AM12855R;AM00659R;AM01502;	0.424683	AM00658R;AM00659R	1	NA	1	NA	1	NA	1	NA	1	NA	0.0894898	AM00658R;AM12855R;AM00659R	0.851222	AM01502	FALSE	FALSE
24-1-2	3	AM00371R;AM01863;AM01892;	1	NA	1	NA	1	NA	1	NA	1	NA	0.162906	AM01892	1	NA	1	NA	FALSE	FALSE
24-2-1	3	AM00745R;AM01614;AM07752;	0.488991	AM01614	1	NA	1	NA	1	NA	1	NA	1	NA	1	NA	1	NA	FALSE	FALSE
25-1-1	5	AM02825;AM04647;AM07850;AM10375;AM07679;	0.263731	AM07850;AM07679	0.428442	AM07850	1	NA	1	NA	1	NA	0.256502	AM07679	0.587203	AM07679	0.0914568	AM07850;AM10375;AM07679	FALSE	FALSE
25-2-1	7	AM03428;AM05184;AM05347;AM09175;AM10038;AM10425;AM11699;	0.148843	AM05184;AM09175;AM10425	0.543062	AM10425	1	NA	1	NA	1	NA	1	NA	0.710275	AM10425	0.525327	AM05347;AM10038	FALSE	FALSE
25-3-1	7	AM01097;AM03089;AM05072;AM06195;AM07988;AM11839;AM12153;	0.791286	AM11839	1	NA	0.383765	AM11839	1	NA	1	NA	1	NA	0.710275	AM07988	0.0601554	AM01097;AM03089;AM06195;AM07988	FALSE	FALSE
25-4-1	6	AM04719;AM07266;AM07642;AM07722;AM11055;AM11197;	1	NA	1	NA	1	NA	1	NA	1	NA	1	NA	0.654169	AM11055	0.804665	AM07722	FALSE	FALSE
25-5-1	6	AM00077;AM00958;AM01489;AM05611;AM05924;AM12559;	0.345872	AM00077;AM05924	0.488954	AM12559	1	NA	1	NA	1	NA	1	NA	0.252377	AM00958;AM05924	0.0316954	AM00077;AM00958;AM05611;AM05924	FALSE	FALSE
25-6-1	3	AM02803;AM03240;AM04153;	1	NA	1	NA	1	NA	1	NA	1	NA	1	NA	1	NA	0.143201	AM02803;AM03240	FALSE	FALSE
25-8-1	3	AM05738;AM00531R;AM00773R;	1	NA	1	NA	1	NA	1	NA	1	NA	1	NA	0.411887	AM05738	1	NA	FALSE	FALSE
25-8-2	3	AM00128;AM05424;AM07291;	0.488991	AM00128	1	NA	1	NA	1	NA	1	NA	1	NA	0.0703402	AM00128;AM05424	1	NA	FALSE	FALSE
26-1-1	10	AM00021;AM00645;AM03091;AM05426;AM05655;AM06657;AM07541;AM09829;AM11248;AM11315;	0.121678	AM00021;AM00645;AM03091;AM05426	0.673395	AM00021	1	NA	1	NA	1	NA	1	NA	0.499706	AM00645;AM05426	0.728526	AM00645;AM09829	FALSE	FALSE
26-2-1	6	AM01760;AM04423;AM05467;AM08227;AM11202;AM12899;	1	NA	1	NA	0.0558493	AM05467;AM08227	1	NA	1	NA	1	NA	1	NA	0.804665	AM04423	FALSE	FALSE
26-3-1	5	AM01340;AM06878;AM07346;AM07451;AM11865;	0.673407	AM11865	1	NA	1	NA	1	NA	1	NA	1	NA	1	NA	1	NA	FALSE	FALSE
26-4-1	5	AM00937;AM02174;AM02079;AM09197;AM11782;	0.0582705	AM02174;AM09197;AM11782	0.428442	AM09197	1	NA	1	NA	0.0990867	AM09197	0.256502	AM02174	0.187578	AM02174;AM09197	0.0914568	AM00937;AM02174;AM09197	FALSE	FALSE
27-1-1	4	AM05582;AM03932;AM10488;AM09116;	0.0273724	AM05582;AM03932;AM10488	1	NA	1	NA	1	NA	1	NA	1	NA	0.125713	AM10488;AM09116	0.00321641	AM05582;AM03932;AM10488;AM09116	TRUE	TURE
27-2-1	5	AM03570;AM04957;AM08267;AM11003;AM12012;	0.0582705	AM04957;AM11003;AM12012	0.428442	AM04957	1	NA	1	NA	1	NA	1	NA	0.0329148	AM08267;AM11003;AM12012	0.342374	AM08267;AM12012	FALSE	FALSE
28-1-1	3	AM02730;AM03860;AM07787;	0.10446	AM03860;AM07787	0.285096	AM03860	1	NA	1	NA	1	NA	1	NA	0.0703402	AM03860;AM07787	0.013511	AM02730;AM03860;AM07787	FALSE	FALSE
28-2-1	5	AM02886;AM01799;AM02378;AM07221;AM09660;	1	NA	1	NA	1	NA	1	NA	1	NA	1	NA	0.587203	AM07221	0.342374	AM02886;AM01799	FALSE	FALSE
28-3-1	5	AM03826;AM04140;AM08977;AM11830;AM12603;	0.0582705	AM03826;AM04140;AM12603	1	NA	1	NA	1	NA	1	NA	1	NA	0.587203	AM03826	0.01302	AM03826;AM08977;AM11830;AM12603	FALSE	FALSE
29-1-1	9	AM02488;AM04665;AM05528;AM06038;AM07771;AM09155;AM09163;AM10501;AM11948;	0.866628	AM09155	0.0610195	AM02488;AM07771;AM10501	1	NA	1	NA	1	NA	1	NA	0.442215	AM07771;AM09163	0.670589	AM02488;AM06038	FALSE	FALSE
29-2-1	4	AM07222;AM07229;AM07780;AM02954;	1	NA	1	NA	0.241651	AM07780	1	NA	1	NA	1	NA	1	NA	0.663312	AM02954	FALSE	FALSE
29-3-1	4	AM03524;AM07364;AM12229;AM12506;	0.591472	AM03524	1	NA	1	NA	1	NA	1	NA	1	NA	0.125713	AM03524;AM12506	0.663312	AM12506	FALSE	FALSE
29-4-1	4	AM04591;AM08206;AM10361;AM02683;	1	NA	0.360772	AM10361	0.241651	AM10361	1	NA	1	NA	1	NA	0.125713	AM08206;AM10361	0.00321641	AM04591;AM08206;AM10361;AM02683	FALSE	FALSE
30-1-1	7	AM04342;AM04817;AM08677;AM02691;AM05203;AM05577;AM11537;	0.0047146	AM04342;AM08677;AM02691;AM05203;AM05577	1	NA	0.383765	AM04817	1	NA	1	NA	1	NA	2.92459e-06	AM04342;AM04817;AM08677;AM02691;AM05203;AM05577;AM11537	0.525327	AM04342;AM04817	TRUE	TURE
30-2-1	4	AM08975;AM12090;AM12547;AM07888;	0.0273724	AM08975;AM12547;AM07888	1	NA	1	NA	1	NA	1	NA	1	NA	0.0149675	AM12090;AM12547;AM07888	1	NA	TRUE	TURE
30-3-1	6	AM02966;AM04249;AM08057;AM10644;AM12224;AM12600;	6.46735e-05	AM02966;AM04249;AM08057;AM10644;AM12224;AM12600	1	NA	1	NA	1	NA	1	NA	1	NA	1.80775e-05	AM02966;AM04249;AM08057;AM10644;AM12224;AM12600	0.151218	AM02966;AM10644;AM12224	TRUE	TURE
30-4-1	4	AM02755;AM07829;AM10612;AM05770;	0.181547	AM02755;AM05770	1	NA	0.241651	AM05770	1	NA	1	NA	1	NA	0.0149675	AM02755;AM10612;AM05770	0.663312	AM05770	FALSE	FALSE
31-1-1	8	AM03538;AM04316;AM04466;AM05678;AM06691;AM07914;AM08709;AM09830;	0.204137	AM03538;AM06691;AM08709	0.204377	AM03538;AM06691	1	NA	1	NA	1	NA	1	NA	0.00405859	AM03538;AM05678;AM06691;AM08709;AM09830	0.0032367	AM03538;AM04316;AM05678;AM06691;AM07914;AM08709	FALSE	FALSE
31-2-1	4	AM06058;AM07987;AM08044;AM06467;	0.591472	AM07987	1	NA	1	NA	1	NA	1	NA	0.211089	AM08044	0.507278	AM07987	1	NA	FALSE	FALSE
32-1-1	3	AM02588;AM10929;AM12271;	0.10446	AM10929;AM12271	1	NA	0.187347	AM12271	1	NA	1	NA	1	NA	0.0703402	AM10929;AM12271	0.143201	AM02588;AM12271	FALSE	FALSE
32-2-1	5	AM02639;AM04161;AM06346;AM10191;AM10234;	1	NA	0.428442	AM10191	0.29233	AM10191	1	NA	1	NA	1	NA	0.00300263	AM02639;AM04161;AM06346;AM10191	0.0914568	AM06346;AM10191;AM10234	FALSE	FALSE
35-1-1	4	AM06002;AM02897;AM02899;AM08793;	0.181547	AM06002;AM02899	0.0580681	AM06002;AM08793	1	NA	1	NA	1	NA	1	NA	0.000689883	AM06002;AM02897;AM02899;AM08793	0.663312	AM08793	FALSE	FALSE
35-2-1	4	AM03143;AM03600;AM04323;AM10788;	0.181547	AM03143;AM03600	1	NA	0.241651	AM10788	1	NA	1	NA	0.211089	AM03600	0.000689883	AM03143;AM03600;AM04323;AM10788	0.242007	AM03143;AM03600	FALSE	FALSE
35-3-1	3	AM00751R;AM06681;AM07008;	0.488991	AM06681	1	NA	1	NA	1	NA	1	NA	1	NA	0.00425929	AM00751R;AM06681;AM07008	1	NA	FALSE	FALSE
